# Supplementary material for: SRSF1 regulates primordial follicle formation and number determination during meiotic prophase I
Source: PubMed Central journal article supplement (PMC9993595; doi:10.1186/s12915-023-01549-7), 2023-03-08
Supplement: 12915_2023_1549_MOESM2_ESM.pdf [file 12915_2023_1549_MOESM2_ESM.pdf]

**Additional file 2: Table 1. Differential genes are analyzed in this study.**

| gene_id            | cKO1    | cKO2    | cKO3    | Control4 | Control5 | Control6 | cKO     | Ctrl1   | log2Fold<br>Change | pvalue   | padj     | gene_name                 | gene_chr |
|--------------------|---------|---------|---------|----------|----------|----------|---------|---------|--------------------|----------|----------|---------------------------|----------|
| ENSMUSG00000021032 | 141.618 | 46.1415 | 95.0332 | 14.6803  | 9.70494  | 9.87139  | 94.2642 | 11.4189 | 3.04988            | 2.72E-09 | 5.64E-05 | <i>Ngb</i>                | 12       |
| ENSMUSG00000018379 | 2914.88 | 3339.14 | 3295.98 | 7204.88  | 6292.68  | 5650.03  | 3183.33 | 6382.53 | -1.00353           | 3.48E-08 | 0.00032  | <i>Srsf1</i>              | 11       |
| ENSMUSG00000052187 | 993.363 | 239.183 | 264.975 | 95.422   | 61.1411  | 104.098  | 499.174 | 86.8871 | 2.52212            | 4.59E-08 | 0.00032  | <i>Hbb-y</i>              | 7        |
| ENSMUSG00000085601 | 6188.4  | 2500.12 | 4700.23 | 664.808  | 1241.26  | 1697.88  | 4462.92 | 1201.32 | 1.89303            | 8.43E-08 | 0.00044  | <i>Gm4969</i>             | 7        |
| ENSMUSG00000021182 | 253.69  | 297.566 | 242.614 | 524.297  | 614.323  | 571.643  | 264.623 | 570.088 | -1.10642           | 1.15E-07 | 0.00048  | <i>Ccdc88c</i>            | 12       |
| ENSMUSG00000044303 | 199.691 | 171.383 | 297.398 | 59.7698  | 44.6427  | 95.1243  | 222.824 | 66.5123 | 1.73986            | 7.36E-07 | 0.00254  | <i>Cdkn2a</i>             | 4        |
| ENSMUSG00000095478 | 511.455 | 604.548 | 408.084 | 169.872  | 267.856  | 155.25   | 508.029 | 197.659 | 1.3627             | 9.00E-07 | 0.00267  | <i>Gm9824</i>             | 10       |
| ENSMUSG00000108315 | 10.1883 | 0.94166 | 5.59019 | 45.0895  | 307.647  | 373.318  | 5.5734  | 242.018 | -5.44639           | 1.14E-06 | 0.00295  | <i>Gm44601</i>            | 7        |
| ENSMUSG00000041828 | 17.3202 | 7.53331 | 14.5345 | 38.7979  | 71.8165  | 109.483  | 13.1293 | 73.3657 | -2.49206           | 2.55E-06 | 0.00588  | <i>Abca8a</i>             | 11       |
| ENSMUSG00000056753 | 269.991 | 150.666 | 286.218 | 61.867   | 87.3444  | 96.9191  | 235.625 | 82.0435 | 1.51833            | 3.57E-06 | 0.0074   | <i>C330011M1<br/>8Rik</i> | 8        |
| ENSMUSG00000050994 | 3.0565  | 2.82499 | 2.23608 | 15.7289  | 39.7902  | 46.6648  | 2.70586 | 34.0613 | -3.65184           | 4.08E-06 | 0.00769  | <i>Adgb</i>               | 10       |
| ENSMUSG00000083773 | 14.2637 | 16.9499 | 7.82627 | 16.7775  | 1583.85  | 1703.26  | 13.0133 | 1101.3  | -6.40151           | 5.05E-06 | 0.00872  | <i>Gm13394</i>            | 2        |
| ENSMUSG00000112206 | 31.5839 | 16.9499 | 70.4364 | 3.14578  | 0.97049  | 5.3844   | 39.6567 | 3.16689 | 3.62843            | 5.67E-06 | 0.0089   | <i>Gm30228</i>            | 10       |
| ENSMUSG00000029503 | 118.185 | 39.5499 | 110.686 | 10.4859  | 21.3509  | 22.435   | 89.4735 | 18.0906 | 2.29764            | 6.01E-06 | 0.0089   | <i>P2rx2</i>              | 5        |
| ENSMUSG00000107880 | 0       | 0       | 0       | 4.19437  | 16.4984  | 43.0752  | 0       | 21.256  | -6.82332           | 6.75E-06 | 0.00933  | <i>Gm44113</i>            | 6        |
| ENSMUSG00000073627 | 424.854 | 122.416 | 288.454 | 66.0614  | 77.6395  | 101.406  | 278.575 | 81.7023 | 1.76728            | 1.00E-05 | 0.01297  | <i>C130036L2<br/>4Rik</i> | 1        |

|                     |         |         |         |         |         |         |         |         |          |          |         |                           |    |
|---------------------|---------|---------|---------|---------|---------|---------|---------|---------|----------|----------|---------|---------------------------|----|
| ENSMUSG00000067702  | 731.523 | 635.623 | 1640.16 | 248.517 | 184.394 | 480.109 | 1002.44 | 304.34  | 1.71855  | 1.14E-05 | 0.01391 | <i>Tuba3a</i>             | 6  |
| ENSMUSG00000090256  | 67.243  | 7.53331 | 44.7215 | 3.14578 | 3.88198 | 1.7948  | 39.8326 | 2.94085 | 3.76561  | 1.21E-05 | 0.01395 | <i>Alms1-ps1</i>          | 6  |
| ENSMUSG00000025241  | 3136.99 | 1683.69 | 2246.14 | 1005.6  | 1148.09 | 1205.21 | 2355.61 | 1119.63 | 1.07286  | 1.33E-05 | 0.01453 | <i>Fyco1</i>              | 9  |
| ENSMUSG00000094004  | 1.01883 | 0.94166 | 8.9443  | 17.8261 | 35.9083 | 78.9712 | 3.63493 | 44.2352 | -3.65092 | 1.42E-05 | 0.01469 | <i>Gm5128</i>             | X  |
| ENSMUSG00000039629  | 897.593 | 341.824 | 972.693 | 139.463 | 237.771 | 331.14  | 737.37  | 236.125 | 1.64122  | 1.92E-05 | 0.01898 | <i>Strip2</i>             | 6  |
| ENSMUSG00000056300  | 314.82  | 82.8664 | 320.877 | 29.3606 | 72.787  | 73.5868 | 239.521 | 58.5781 | 2.02786  | 2.06E-05 | 0.01917 | <i>Zfp981</i>             | 4  |
| ENSMUSG00000002108  | 138.561 | 91.3414 | 207.955 | 49.2839 | 49.4952 | 51.1518 | 145.953 | 49.9769 | 1.54326  | 2.13E-05 | 0.01917 | <i>Nr1h3</i>              | 2  |
| ENSMUSG00000022838  | 311.763 | 164.791 | 447.215 | 56.624  | 98.9904 | 138.2   | 307.923 | 97.938  | 1.64881  | 2.99E-05 | 0.02447 | <i>Eaf2</i>               | 16 |
| ENSMUSG00000097667  | 47.8852 | 20.7166 | 59.256  | 10.4859 | 3.88198 | 5.3844  | 42.6193 | 6.5841  | 2.7026   | 3.13E-05 | 0.02447 | <i>Gm26764</i>            | 12 |
| ENSMUSG00000037747  | 627.602 | 205.283 | 673.059 | 101.714 | 107.725 | 234.221 | 501.981 | 147.887 | 1.76088  | 3.15E-05 | 0.02447 | <i>Phyhipl</i>            | 10 |
| ENSMUSG00000029564  | 5.09417 | 0       | 1.11804 | 8.38875 | 41.7312 | 52.9466 | 2.07074 | 34.3555 | -4.06479 | 3.27E-05 | 0.02447 | <i>4930519G0<br/>4Rik</i> | 5  |
| ENSMUSG00000020469  | 62.1489 | 40.4915 | 64.8462 | 14.6803 | 10.6754 | 17.0506 | 55.8289 | 14.1354 | 1.97711  | 3.37E-05 | 0.02447 | <i>Myl7</i>               | 11 |
| ENSMUSG00000093675  | 0       | 0       | 0       | 1.04859 | 15.5279 | 42.1778 | 0       | 19.5848 | -6.70485 | 3.42E-05 | 0.02447 | <i>Gm20618</i>            | 6  |
| ENSMUSG000000116124 | 0       | 1.88333 | 1.11804 | 7.34015 | 26.2033 | 46.6648 | 1.00046 | 26.7361 | -4.72424 | 3.86E-05 | 0.02671 | <i>Gm49420</i>            | 15 |
| ENSMUSG00000032484  | 233.313 | 106.408 | 115.158 | 1011.89 | 293.089 | 302.424 | 151.626 | 535.802 | -1.82053 | 5.08E-05 | 0.03397 | <i>Ngp</i>                | 9  |
| ENSMUSG00000040570  | 853.783 | 597.956 | 1175.06 | 348.133 | 346.466 | 501.646 | 875.599 | 398.749 | 1.13362  | 5.59E-05 | 0.03597 | <i>Rundc3b</i>            | 5  |
| ENSMUSG00000064225  | 63.1677 | 46.1415 | 43.6035 | 224.399 | 255.24  | 62.818  | 50.9709 | 180.819 | -1.82514 | 5.91E-05 | 0.03597 | <i>Paqr9</i>              | 9  |
| ENSMUSG00000098703  | 81.5067 | 16.9499 | 42.4854 | 8.38875 | 3.88198 | 8.97399 | 46.9807 | 7.08157 | 2.72737  | 5.96E-05 | 0.03597 | <i>Gm27527</i>            | 5  |

|                    |         |         |         |         |         |         |         |         |          |          |         |                |    |
|--------------------|---------|---------|---------|---------|---------|---------|---------|---------|----------|----------|---------|----------------|----|
| ENSMUSG00000026173 | 128.373 | 41.4332 | 115.158 | 7.34015 | 23.2919 | 31.409  | 94.9881 | 20.6803 | 2.18909  | 6.07E-05 | 0.03597 | <i>Plcd4</i>   | 1  |
| ENSMUSG00000052861 | 97.8081 | 20.7166 | 58.138  | 11.5345 | 7.76395 | 13.461  | 58.8875 | 10.9198 | 2.42736  | 6.51E-05 | 0.0375  | <i>Dnah6</i>   | 6  |
| ENSMUSG00000051159 | 636.771 | 409.624 | 922.381 | 133.171 | 248.446 | 346.396 | 656.259 | 242.671 | 1.43332  | 6.74E-05 | 0.0378  | <i>Cited1</i>  | X  |
| ENSMUSG00000032591 | 17.3202 | 17.8916 | 30.187  | 116.394 | 95.1084 | 39.4856 | 21.7996 | 83.6626 | -1.94371 | 7.10E-05 | 0.03833 | <i>Mst1</i>    | 9  |
| ENSMUSG00000020461 | 177.277 | 50.8498 | 174.414 | 22.0205 | 30.0853 | 52.0492 | 134.18  | 34.7183 | 1.94379  | 7.28E-05 | 0.03833 | <i>Clhc1</i>   | 11 |
| ENSMUSG00000032496 | 151.806 | 112.058 | 52.5478 | 635.447 | 312.499 | 159.737 | 105.471 | 369.228 | -1.80519 | 7.65E-05 | 0.03833 | <i>Ltf</i>     | 9  |
| ENSMUSG00000026643 | 5233.75 | 2972.83 | 6466.73 | 2188.41 | 2054.54 | 2685.02 | 4891.1  | 2309.32 | 1.08252  | 7.76E-05 | 0.03833 | <i>Nmt2</i>    | 2  |
| ENSMUSG00000109032 | 2896.54 | 1208.15 | 2414.96 | 486.547 | 763.779 | 1224.05 | 2173.22 | 824.793 | 1.39718  | 7.76E-05 | 0.03833 | <i>Gm7972</i>  | 9  |
| ENSMUSG00000105034 | 0       | 0       | 0       | 4.19437 | 14.5574 | 21.5376 | 0       | 13.4298 | -6.1607  | 8.02E-05 | 0.03869 | <i>Gm43348</i> | 3  |
| ENSMUSG00000105873 | 140.599 | 46.1415 | 190.066 | 16.7775 | 40.7607 | 36.7934 | 125.602 | 31.4439 | 1.99204  | 8.40E-05 | 0.0396  | <i>Gm43708</i> | 5  |
| ENSMUSG00000071424 | 4.07534 | 4.70832 | 5.59019 | 23.069  | 18.4394 | 61.9206 | 4.79128 | 34.4763 | -2.85481 | 9.15E-05 | 0.04218 | <i>Grid2</i>   | 6  |
| ENSMUSG00000023826 | 176.258 | 133.716 | 155.407 | 63.9642 | 74.728  | 76.279  | 155.127 | 71.6571 | 1.11225  | 9.60E-05 | 0.0433  | <i>Prkn</i>    | 17 |
| ENSMUSG00000073421 | 406.515 | 266.491 | 458.396 | 67.11   | 104.813 | 223.452 | 377.134 | 131.792 | 1.51337  | 0.0001   | 0.04365 | <i>H2-Ab1</i>  | 17 |
| ENSMUSG00000023045 | 21.3955 | 37.6665 | 49.1937 | 242.225 | 120.341 | 55.6388 | 36.0852 | 139.402 | -1.94995 | 0.0001   | 0.04365 | <i>Soat2</i>   | 15 |
| ENSMUSG00000041992 | 1270.49 | 514.148 | 1009.59 | 358.619 | 345.496 | 498.954 | 931.408 | 401.023 | 1.21498  | 0.00011  | 0.04606 | <i>Rapgef5</i> | 12 |
| ENSMUSG00000039956 | 64.1865 | 77.2164 | 68.2003 | 301.995 | 255.24  | 82.5607 | 69.8678 | 213.265 | -1.60794 | 0.00011  | 0.04633 | <i>Mrap</i>    | 16 |
| ENSMUSG00000031383 | 380.025 | 371.015 | 566.845 | 156.24  | 175.659 | 273.707 | 439.295 | 201.869 | 1.11934  | 0.00011  | 0.04633 | <i>Dusp9</i>   | X  |
| ENSMUSG00000037139 | 19.3578 | 15.0666 | 10.0623 | 10.4859 | 104.813 | 166.019 | 14.8289 | 93.7727 | -2.65997 | 0.00012  | 0.04941 | <i>Myom3</i>   | 4  |

|                    |         |         |         |         |         |         |         |         |          |         |         |                           |    |
|--------------------|---------|---------|---------|---------|---------|---------|---------|---------|----------|---------|---------|---------------------------|----|
| ENSMUSG00000068048 | 78.4502 | 95.108  | 152.053 | 11.5345 | 29.1148 | 49.357  | 108.537 | 30.0021 | 1.84518  | 0.00013 | 0.05019 | <i>Rhox9</i>              | X  |
| ENSMUSG00000102596 | 0       | 0       | 0       | 1.04859 | 19.4099 | 23.3324 | 0       | 14.597  | -6.28042 | 0.00013 | 0.05062 | <i>Gm20203</i>            | 1  |
| ENSMUSG00000022026 | 41.7722 | 21.6583 | 8.9443  | 156.24  | 83.4625 | 58.331  | 24.1249 | 99.3446 | -2.0352  | 0.00013 | 0.05062 | <i>Olfm4</i>              | 14 |
| ENSMUSG00000115548 | 0       | 0.94166 | 2.23608 | 2.09719 | 38.8198 | 38.5882 | 1.05925 | 26.5017 | -4.68193 | 0.00015 | 0.05487 | <i>5430440P1<br/>ORik</i> | 14 |
| ENSMUSG00000035439 | 1233.81 | 830.547 | 920.145 | 533.734 | 604.618 | 542.029 | 994.834 | 560.127 | 0.82859  | 0.00015 | 0.05503 | <i>Haus8</i>              | 8  |
| ENSMUSG00000021640 | 98.8269 | 19.7749 | 83.8529 | 4.19437 | 6.79346 | 22.435  | 67.4849 | 11.1409 | 2.58271  | 0.00016 | 0.05555 | <i>Naip1</i>              | 13 |
| ENSMUSG00000054994 | 6.113   | 1.88333 | 7.82627 | 6.29156 | 72.787  | 55.6388 | 5.2742  | 44.9058 | -3.1078  | 0.00016 | 0.05776 | <i>AV320801</i>           | X  |
| ENSMUSG00000102133 | 48.904  | 7.53331 | 40.2494 | 3.14578 | 3.88198 | 4.487   | 32.2289 | 3.83825 | 3.0608   | 0.00017 | 0.05799 | <i>Gm37106</i>            | 1  |
| ENSMUSG00000116950 | 70.2995 | 16.9499 | 43.6035 | 2.09719 | 6.79346 | 11.6662 | 43.6177 | 6.85228 | 2.65118  | 0.00018 | 0.06106 | <i>AC154378.<br/>3</i>    | 17 |
| ENSMUSG00000072944 | 57.0547 | 30.1332 | 72.6725 | 54.5268 | 232.919 | 317.679 | 53.2868 | 201.708 | -1.92488 | 0.00019 | 0.0623  | <i>Nup62cl</i>            | X  |
| ENSMUSG00000032056 | 71.3184 | 29.1916 | 72.6725 | 10.4859 | 9.70494 | 21.5376 | 57.7275 | 13.9095 | 2.04189  | 0.00019 | 0.0623  | <i>Bitg4</i>              | 9  |
| ENSMUSG00000068417 | 12.226  | 17.8916 | 6.70823 | 56.624  | 72.787  | 28.7168 | 12.2753 | 52.7093 | -2.08845 | 0.00019 | 0.0623  | <i>Pnp2</i>               | 14 |
| ENSMUSG00000024053 | 82.5255 | 135.6   | 128.574 | 446.701 | 358.112 | 139.994 | 115.566 | 314.936 | -1.44519 | 0.0002  | 0.0623  | <i>Emilin2</i>            | 17 |
| ENSMUSG00000079184 | 3955.11 | 1895.57 | 4206.06 | 1253.07 | 1321.81 | 2011.07 | 3352.25 | 1528.65 | 1.13257  | 0.0002  | 0.0623  | <i>Mphosph8</i>           | 14 |
| ENSMUSG00000030760 | 1485.46 | 729.789 | 1758.67 | 555.754 | 469.719 | 750.226 | 1324.64 | 591.9   | 1.16155  | 0.00021 | 0.06281 | <i>Acer3</i>              | 7  |
| ENSMUSG00000035910 | 10.1883 | 5.64998 | 7.82627 | 17.8261 | 37.8493 | 70.8946 | 7.8882  | 42.19   | -2.42705 | 0.00021 | 0.06281 | <i>Dcdc2a</i>             | 13 |
| ENSMUSG00000091144 | 266.934 | 138.425 | 279.51  | 71.3043 | 106.754 | 110.38  | 228.29  | 96.1463 | 1.2443   | 0.00021 | 0.06281 | <i>Phf11c</i>             | 14 |
| ENSMUSG00000067203 | 32.6027 | 15.0666 | 38.0133 | 3.14578 | 5.82296 | 4.487   | 28.5609 | 4.48525 | 2.66147  | 0.00022 | 0.06481 | <i>H2-K2</i>              | 17 |

|                    |         |         |         |         |         |         |         |         |          |         |         |                |    |
|--------------------|---------|---------|---------|---------|---------|---------|---------|---------|----------|---------|---------|----------------|----|
| ENSMUSG00000046634 | 5.09417 | 16.0083 | 14.5345 | 26.2148 | 23.2919 | 188.454 | 11.879  | 79.3202 | -2.74133 | 0.00023 | 0.06567 | <i>Pkd11l1</i> | 11 |
| ENSMUSG00000106457 | 210.899 | 64.0331 | 247.086 | 22.0205 | 32.9968 | 81.6633 | 174.006 | 45.5602 | 1.92692  | 0.00023 | 0.06567 | <i>Gm42585</i> | 5  |
| ENSMUSG00000109186 | 76.4125 | 14.125  | 48.0756 | 8.38875 | 10.6754 | 6.2818  | 46.2044 | 8.44866 | 2.45193  | 0.00023 | 0.06567 | <i>Gm34821</i> | 7  |
| ENSMUSG00000030054 | 18.339  | 16.9499 | 26.8329 | 104.859 | 88.3149 | 32.3064 | 20.7073 | 75.1602 | -1.86198 | 0.00023 | 0.06582 | <i>Gp9</i>     | 6  |
| ENSMUSG00000103685 | 115.128 | 54.6165 | 83.8529 | 30.4092 | 32.0263 | 27.8194 | 84.5325 | 30.085  | 1.48986  | 0.00024 | 0.0677  | <i>Gm37074</i> | 1  |
| ENSMUSG00000016200 | 1864.47 | 733.556 | 2223.78 | 745.55  | 520.185 | 760.097 | 1607.27 | 675.277 | 1.25076  | 0.00026 | 0.07079 | <i>Syt14</i>   | 1  |
| ENSMUSG00000030443 | 665.299 | 309.807 | 569.081 | 240.128 | 178.571 | 287.168 | 514.729 | 235.289 | 1.12839  | 0.00027 | 0.07347 | <i>Zfp583</i>  | 7  |
| ENSMUSG00000004347 | 84.5632 | 74.3914 | 125.22  | 18.8747 | 23.2919 | 50.2544 | 94.725  | 30.807  | 1.61082  | 0.00028 | 0.07487 | <i>Pdelc</i>   | 6  |
| ENSMUSG00000056071 | 194.597 | 204.341 | 139.755 | 1046.5  | 316.381 | 250.374 | 179.564 | 537.75  | -1.58106 | 0.00029 | 0.07487 | <i>S100a9</i>  | 3  |
| ENSMUSG00000075359 | 3.0565  | 5.64998 | 5.59019 | 4.19437 | 56.2886 | 59.2284 | 4.76556 | 39.9038 | -3.06911 | 0.00029 | 0.07624 | <i>Gm20775</i> | Y  |
| ENSMUSG00000022034 | 4166.01 | 1329.63 | 5073.66 | 1196.44 | 1217    | 1738.26 | 3523.1  | 1383.9  | 1.34788  | 0.0003  | 0.07673 | <i>Esco2</i>   | 14 |
| ENSMUSG00000105703 | 188.484 | 249.541 | 252.677 | 291.509 | 494.952 | 832.787 | 230.234 | 539.749 | -1.23008 | 0.0003  | 0.07673 | <i>Gm43305</i> | 14 |
| ENSMUSG00000057215 | 23.4332 | 6.59165 | 31.3051 | 3.14578 | 0       | 0       | 20.4433 | 1.04859 | 4.35461  | 0.00031 | 0.07673 | <i>Platr28</i> | 7  |
| ENSMUSG00000087512 | 7.13184 | 0.94166 | 6.70823 | 13.6317 | 25.2328 | 72.6894 | 4.92724 | 37.1846 | -2.93713 | 0.00031 | 0.07673 | <i>Gm11985</i> | 11 |
| ENSMUSG00000046727 | 186.447 | 97.933  | 169.942 | 40.8951 | 57.2591 | 81.6633 | 151.44  | 59.9392 | 1.33188  | 0.00032 | 0.07786 | <i>Cystm1</i>  | 18 |
| ENSMUSG00000026822 | 70.2995 | 59.3248 | 41.3674 | 355.473 | 109.666 | 93.3295 | 56.9973 | 186.156 | -1.70425 | 0.00032 | 0.07786 | <i>Lcn2</i>    | 2  |
| ENSMUSG00000031518 | 0       | 0       | 0       | 2.09719 | 11.6459 | 20.6402 | 0       | 11.4611 | -5.93266 | 0.00034 | 0.07996 | <i>Spata4</i>  | 8  |
| ENSMUSG00000062007 | 27.5085 | 10.3583 | 44.7215 | 1.04859 | 6.79346 | 0.8974  | 27.5294 | 2.91315 | 3.23689  | 0.00035 | 0.08319 | <i>Hsh2d</i>   | 8  |

|                    |         |         |         |         |         |         |         |         |          |         |         |                 |    |
|--------------------|---------|---------|---------|---------|---------|---------|---------|---------|----------|---------|---------|-----------------|----|
| ENSMUSG00000034312 | 2693.8  | 1745.84 | 2843.17 | 1258.31 | 1184.97 | 1593.78 | 2427.6  | 1345.69 | 0.85084  | 0.00036 | 0.08322 | <i>Iqsec1</i>   | 6  |
| ENSMUSG00000070427 | 394.289 | 338.057 | 335.411 | 235.933 | 146.545 | 191.146 | 355.919 | 191.208 | 0.89744  | 0.00036 | 0.08322 | <i>Ill18bp</i>  | 7  |
| ENSMUSG00000063652 | 988.269 | 489.665 | 1107.98 | 354.424 | 295.03  | 521.389 | 861.97  | 390.281 | 1.14213  | 0.00037 | 0.08322 | <i>Slc22a21</i> | 11 |
| ENSMUSG00000020097 | 5767.62 | 4323.18 | 5802.62 | 3113.27 | 3371.5  | 3425.37 | 5297.8  | 3303.38 | 0.68133  | 0.00037 | 0.08322 | <i>Sgpl1</i>    | 10 |
| ENSMUSG00000015085 | 89.6574 | 64.0331 | 84.9709 | 31.4578 | 32.0263 | 33.2038 | 79.5538 | 32.2293 | 1.30147  | 0.00038 | 0.08497 | <i>Entpd2</i>   | 2  |
| ENSMUSG00000089854 | 0       | 0       | 0       | 4.19437 | 8.73444 | 17.948  | 0       | 10.2923 | -5.77728 | 0.0004  | 0.08832 | <i>Gm16133</i>  | 13 |
| ENSMUSG00000042770 | 302.594 | 581.006 | 367.835 | 1694.53 | 1267.46 | 411.009 | 417.145 | 1124.33 | -1.42973 | 0.00041 | 0.08845 | <i>Hebp1</i>    | 6  |
| ENSMUSG00000032854 | 2136.49 | 731.673 | 2336.7  | 364.91  | 664.788 | 942.269 | 1734.96 | 657.323 | 1.3996   | 0.00041 | 0.08845 | <i>Ugt8a</i>    | 3  |
| ENSMUSG00000028037 | 181.352 | 73.4498 | 121.866 | 24.1176 | 39.7902 | 63.7154 | 125.556 | 42.5411 | 1.55519  | 0.00041 | 0.08845 | <i>Ifi44</i>    | 3  |
| ENSMUSG00000021930 | 1155.36 | 588.54  | 1237.67 | 381.688 | 468.749 | 595.873 | 993.855 | 482.103 | 1.04274  | 0.00045 | 0.0948  | <i>Spryd7</i>   | 14 |
| ENSMUSG00000096768 | 222.106 | 177.974 | 292.926 | 1007.7  | 354.23  | 376.01  | 231.002 | 579.313 | -1.32664 | 0.00046 | 0.09535 | <i>Gm47283</i>  | Y  |
| ENSMUSG00000035504 | 113.091 | 97.933  | 150.935 | 367.008 | 248.446 | 176.788 | 120.653 | 264.081 | -1.13077 | 0.00046 | 0.09568 | <i>Reep6</i>    | 10 |
| ENSMUSG00000030471 | 1204.26 | 542.398 | 1120.27 | 443.555 | 428.958 | 535.747 | 955.645 | 469.42  | 1.02494  | 0.00047 | 0.09568 | <i>Zdhhc13</i>  | 7  |
| ENSMUSG00000023908 | 228.219 | 302.274 | 336.529 | 592.455 | 473.601 | 469.34  | 289.007 | 511.799 | -0.82454 | 0.00048 | 0.09623 | <i>Pkmyt1</i>   | 17 |
| ENSMUSG00000027048 | 0       | 0       | 0       | 3.14578 | 12.6164 | 14.3584 | 0       | 10.0402 | -5.74071 | 0.00049 | 0.09623 | <i>Abcb11</i>   | 2  |
| ENSMUSG00000026601 | 63.1677 | 42.3749 | 51.4298 | 60.8184 | 152.368 | 257.554 | 52.3241 | 156.913 | -1.58723 | 0.00049 | 0.09623 | <i>Axdnd1</i>   | 1  |
| ENSMUSG00000095248 | 2.03767 | 0       | 0       | 1.04859 | 21.3509 | 46.6648 | 0.67922 | 23.0214 | -5.08306 | 0.0005  | 0.09623 | <i>Olfir681</i> | 7  |
| ENSMUSG00000061322 | 29.5462 | 11.3    | 16.7706 | 32.5064 | 65.0231 | 121.149 | 19.2056 | 72.8928 | -1.92932 | 0.0005  | 0.09623 | <i>Dnaic1</i>   | 4  |

|                    |         |         |         |         |         |         |         |         |          |         |         |                                 |                |
|--------------------|---------|---------|---------|---------|---------|---------|---------|---------|----------|---------|---------|---------------------------------|----------------|
| ENSMUSG00000050334 | 8.15067 | 1.88333 | 3.35411 | 15.7289 | 35.9083 | 31.409  | 4.4627  | 27.682  | -2.64011 | 0.00051 | 0.09623 | <i>C130071C0</i><br><i>3Rik</i> | 13             |
| ENSMUSG00000024878 | 952.61  | 526.39  | 885.486 | 369.105 | 342.584 | 507.031 | 788.162 | 406.24  | 0.95518  | 0.00051 | 0.09623 | <i>Cbwd1</i>                    | 19             |
| ENSMUSG00000051378 | 441.155 | 372.899 | 433.799 | 984.629 | 672.552 | 591.386 | 415.951 | 749.522 | -0.84928 | 0.00051 | 0.09623 | <i>Kif18b</i>                   | 11             |
| ENSMUSG00000024317 | 1965.33 | 1122.46 | 3107.03 | 800.077 | 816.185 | 1207.9  | 2064.94 | 941.387 | 1.13276  | 0.00051 | 0.09623 | <i>Rnf138</i>                   | 18             |
| ENSMUSG00000022902 | 13.2448 | 42.3749 | 6.70823 | 181.407 | 65.9936 | 43.9726 | 20.776  | 97.1243 | -2.21213 | 0.00052 | 0.09623 | <i>Stfa2</i>                    | 16             |
| ENSMUSG00000055609 | 282.217 | 121.475 | 32.4231 | 42.9923 | 20.3804 | 43.9726 | 145.372 | 35.7818 | 2.02328  | 0.00052 | 0.09623 | <i>Hba-x</i>                    | 11             |
| ENSMUSG00000030699 | 8.15067 | 12.2416 | 13.4165 | 65.0128 | 33.9673 | 30.5116 | 11.2696 | 43.1639 | -1.93572 | 0.00053 | 0.09623 | <i>Tbx6</i>                     | 7              |
| ENSMUSG00000020275 | 990.307 | 384.199 | 1039.78 | 288.363 | 381.404 | 406.522 | 804.76  | 358.763 | 1.1646   | 0.00053 | 0.09623 | <i>Rel</i>                      | 11             |
| ENSMUSG00000108379 | 0       | 0       | 0       | 3.14578 | 7.76395 | 19.7428 | 0       | 10.2175 | -5.76739 | 0.00053 | 0.09623 | <i>A730082K2</i><br><i>4Rik</i> | 7              |
| ENSMUSG00000042708 | 76.4125 | 28.2499 | 95.0332 | 73.4015 | 257.181 | 341.909 | 66.5652 | 224.164 | -1.75609 | 0.00054 | 0.09689 | <i>Shcbp11</i>                  | 1              |
| ENSMUSG00000005686 | 200.71  | 210.933 | 277.273 | 806.368 | 593.942 | 244.093 | 229.639 | 548.134 | -1.25502 | 0.00055 | 0.09741 | <i>Ampd3</i>                    | 7              |
| ENSMUSG00000095320 | 1.01883 | 0       | 2.23608 | 4.19437 | 11.6459 | 46.6648 | 1.08497 | 20.835  | -4.32169 | 0.00056 | 0.09745 | <i>Ccl21a</i>                   | JH584294.<br>1 |
| ENSMUSG00000029561 | 603.15  | 341.824 | 458.396 | 193.99  | 178.571 | 313.192 | 467.79  | 228.584 | 1.03158  | 0.00056 | 0.09745 | <i>Oasl2</i>                    | 5              |
| ENSMUSG00000028456 | 3741.16 | 1745.84 | 3168.52 | 1093.68 | 1460.59 | 1773.26 | 2885.17 | 1442.51 | 0.99977  | 0.00056 | 0.09745 | <i>Unc13b</i>                   | 4              |
| ENSMUSG00000031710 | 114.109 | 179.858 | 197.893 | 79.6931 | 17.4689 | 68.2024 | 163.953 | 55.1214 | 1.57329  | 0.00058 | 0.09889 | <i>Ucp1</i>                     | 8              |
| ENSMUSG00000100084 | 74.3749 | 48.0248 | 55.9019 | 19.9233 | 12.6164 | 26.922  | 59.4339 | 19.8206 | 1.57996  | 0.00059 | 0.09983 | <i>2310068J16</i><br><i>Rik</i> | 15             |
| ENSMUSG00000035671 | 2729.46 | 1436.04 | 1991.23 | 847.263 | 956.907 | 1382.89 | 2052.24 | 1062.35 | 0.94954  | 0.00059 | 0.09983 | <i>Zswim4</i>                   | 8              |
| ENSMUSG00000046179 | 231.275 | 313.574 | 386.841 | 1352.69 | 691.962 | 338.32  | 310.563 | 794.322 | -1.35463 | 0.0006  | 0.09983 | <i>E2f8</i>                     | 7              |

|                    |         |         |         |         |         |         |         |         |          |         |         |                   |    |
|--------------------|---------|---------|---------|---------|---------|---------|---------|---------|----------|---------|---------|-------------------|----|
| ENSMUSG00000026894 | 11.2072 | 2.82499 | 4.47215 | 9.43734 | 52.4067 | 53.844  | 6.16811 | 38.5627 | -2.64992 | 0.0006  | 0.0999  | <i>Morn5</i>      | 2  |
| ENSMUSG00000024521 | 22.4143 | 3.76665 | 15.6525 | 14.6803 | 91.2264 | 113.97  | 13.9445 | 73.2922 | -2.40229 | 0.00061 | 0.101   | <i>Pmaip1</i>     | 18 |
| ENSMUSG00000062519 | 1351.99 | 781.581 | 1387.49 | 614.476 | 671.582 | 666.768 | 1173.69 | 650.942 | 0.84994  | 0.00063 | 0.10303 | <i>Zfp398</i>     | 6  |
| ENSMUSG00000047220 | 1012.72 | 442.582 | 980.519 | 180.358 | 256.21  | 532.158 | 811.941 | 322.909 | 1.32884  | 0.00064 | 0.10355 | <i>Ccdc36</i>     | 9  |
| ENSMUSG00000104401 | 41.7722 | 15.0666 | 17.8886 | 6.29156 | 0       | 2.6922  | 24.9091 | 2.99459 | 3.07644  | 0.00065 | 0.10523 | <i>Gm20750</i>    | 3  |
| ENSMUSG00000072423 | 1.01883 | 1.88333 | 5.59019 | 4.19437 | 33.9673 | 43.0752 | 2.83078 | 27.0789 | -3.2866  | 0.00068 | 0.108   | <i>Psmb11</i>     | 14 |
| ENSMUSG00000026049 | 1631.15 | 746.739 | 2256.2  | 403.708 | 589.09  | 935.09  | 1544.7  | 642.629 | 1.26453  | 0.0007  | 0.10897 | <i>Tex30</i>      | 1  |
| ENSMUSG00000043289 | 49.9229 | 40.4915 | 152.053 | 20.9719 | 14.5574 | 30.5116 | 80.8225 | 22.0136 | 1.86968  | 0.0007  | 0.10897 | <i>Mei4</i>       | 9  |
| ENSMUSG00000028132 | 297.5   | 134.658 | 235.906 | 865.089 | 677.405 | 226.145 | 222.688 | 589.546 | -1.40467 | 0.0007  | 0.10897 | <i>Tmem56</i>     | 3  |
| ENSMUSG00000023443 | 8.15067 | 0.94166 | 0       | 8.38875 | 59.2001 | 26.0246 | 3.03078 | 31.2045 | -3.35774 | 0.00071 | 0.10928 | <i>Esx1</i>       | X  |
| ENSMUSG00000024491 | 2898.58 | 1206.27 | 2774.97 | 995.115 | 1085.01 | 1307.51 | 2293.27 | 1129.21 | 1.02177  | 0.00073 | 0.11189 | <i>Rbm27</i>      | 18 |
| ENSMUSG00000021573 | 170.145 | 85.6914 | 235.906 | 51.3811 | 45.6132 | 89.7399 | 163.914 | 62.2447 | 1.39212  | 0.00074 | 0.11233 | <i>Tppp</i>       | 13 |
| ENSMUSG00000029055 | 75.3937 | 26.3666 | 48.0756 | 16.7775 | 12.6164 | 13.461  | 49.9453 | 14.285  | 1.80669  | 0.00075 | 0.11407 | <i>Plch2</i>      | 4  |
| ENSMUSG00000038637 | 319.914 | 228.824 | 292.926 | 380.639 | 594.913 | 540.234 | 280.555 | 505.262 | -0.84994 | 0.00077 | 0.11607 | <i>Lrrc56</i>     | 7  |
| ENSMUSG00000024905 | 873.141 | 435.049 | 881.014 | 183.504 | 260.092 | 492.672 | 729.734 | 312.089 | 1.22386  | 0.00078 | 0.11607 | <i>Tesmin</i>     | 19 |
| ENSMUSG00000116655 | 27.5085 | 11.3    | 38.0133 | 1.04859 | 3.88198 | 6.2818  | 25.6073 | 3.73745 | 2.74935  | 0.00079 | 0.11633 | <i>AC154507.2</i> | 17 |
| ENSMUSG00000044471 | 0       | 0.94166 | 0       | 4.19437 | 12.6164 | 22.435  | 0.31389 | 13.0819 | -5.16178 | 0.00082 | 0.1207  | <i>Lncpint</i>    | 6  |
| ENSMUSG00000023935 | 113.091 | 105.466 | 112.922 | 54.5268 | 48.5247 | 60.1258 | 110.493 | 54.3924 | 1.02114  | 0.00086 | 0.12462 | <i>Spats1</i>     | 17 |



|                    |         |         |         |         |         |         |         |         |          |         |         |                 |    |
|--------------------|---------|---------|---------|---------|---------|---------|---------|---------|----------|---------|---------|-----------------|----|
| ENSMUSG00000051705 | 788.577 | 419.04  | 877.66  | 278.926 | 348.407 | 422.675 | 695.093 | 350.003 | 0.98855  | 0.00086 | 0.12462 | <i>Senp8</i>    | 9  |
| ENSMUSG00000041235 | 266.934 | 280.616 | 324.231 | 709.898 | 563.857 | 362.549 | 290.594 | 545.435 | -0.90803 | 0.00087 | 0.12499 | <i>Chd7</i>     | 4  |
| ENSMUSG00000037254 | 6.113   | 4.70832 | 6.70823 | 7.34015 | 37.8493 | 58.331  | 5.84318 | 34.5068 | -2.57128 | 0.00088 | 0.125   | <i>Itih2</i>    | 2  |
| ENSMUSG00000024269 | 1652.55 | 1096.1  | 1905.14 | 699.412 | 721.077 | 1093.03 | 1551.26 | 837.84  | 0.88803  | 0.00088 | 0.125   | <i>Tpgs2</i>    | 18 |
| ENSMUSG00000070291 | 580.735 | 191.158 | 613.803 | 106.957 | 163.043 | 262.938 | 461.899 | 177.646 | 1.37648  | 0.00089 | 0.12522 | <i>Ddx43</i>    | 9  |
| ENSMUSG00000109234 | 0       | 0       | 0       | 8.38875 | 10.6754 | 6.2818  | 0       | 8.44866 | -5.48665 | 0.00089 | 0.12522 | <i>Gm44561</i>  | 7  |
| ENSMUSG00000054905 | 29.5462 | 45.1999 | 21.2427 | 202.378 | 69.8756 | 50.2544 | 31.9963 | 107.503 | -1.74118 | 0.00091 | 0.12673 | <i>Stfa3</i>    | 16 |
| ENSMUSG00000071037 | 287.311 | 130.891 | 296.28  | 79.6931 | 97.0494 | 137.302 | 238.161 | 104.682 | 1.18258  | 0.00093 | 0.12869 | <i>Camkmt</i>   | 17 |
| ENSMUSG00000070814 | 989.288 | 677.998 | 783.745 | 361.765 | 465.837 | 568.054 | 817.01  | 465.219 | 0.81153  | 0.00094 | 0.12869 | <i>Zswim9</i>   | 7  |
| ENSMUSG00000056054 | 138.561 | 148.783 | 176.65  | 816.854 | 259.122 | 187.556 | 154.665 | 421.177 | -1.4447  | 0.00095 | 0.12941 | <i>S100a8</i>   | 3  |
| ENSMUSG00000114230 | 7.13184 | 0.94166 | 22.3608 | 0       | 0       | 0       | 10.1448 | 0       | 5.82205  | 0.00099 | 0.13438 | <i>Gm48239</i>  | 14 |
| ENSMUSG00000028617 | 4674.41 | 3402.23 | 4987.57 | 2109.77 | 2272.9  | 3232.43 | 4354.74 | 2538.37 | 0.77844  | 0.001   | 0.13522 | <i>Lrrc42</i>   | 4  |
| ENSMUSG00000019814 | 2023.4  | 1013.23 | 2165.64 | 670.051 | 812.303 | 1135.21 | 1734.09 | 872.522 | 0.99034  | 0.00106 | 0.1416  | <i>Ltv1</i>     | 10 |
| ENSMUSG00000045942 | 209.88  | 107.35  | 243.732 | 37.7494 | 56.2886 | 116.662 | 186.987 | 70.2333 | 1.40728  | 0.00109 | 0.14492 | <i>BC049762</i> | 11 |
| ENSMUSG00000079553 | 356.592 | 505.673 | 400.258 | 917.519 | 805.51  | 537.542 | 420.841 | 753.524 | -0.83938 | 0.00112 | 0.14792 | <i>Kifc1</i>    | 17 |
| ENSMUSG00000032065 | 977.062 | 525.448 | 1383.01 | 210.767 | 362.965 | 627.282 | 961.841 | 400.338 | 1.26335  | 0.00113 | 0.14792 | <i>Tex12</i>    | 9  |
| ENSMUSG00000086741 | 5.09417 | 9.41664 | 4.47215 | 63.9642 | 24.2623 | 13.461  | 6.32765 | 33.8958 | -2.40554 | 0.00116 | 0.15163 | <i>Gm15816</i>  | 8  |
| ENSMUSG00000071561 | 57.0547 | 93.2247 | 70.4364 | 398.465 | 109.666 | 116.662 | 73.5719 | 208.264 | -1.49856 | 0.0012  | 0.15463 | <i>BC100530</i> | 16 |

|                    |         |         |         |         |         |         |         |         |          |         |         |                           |    |
|--------------------|---------|---------|---------|---------|---------|---------|---------|---------|----------|---------|---------|---------------------------|----|
| ENSMUSG00000038203 | 2.03767 | 3.76665 | 2.23608 | 8.38875 | 19.4099 | 33.2038 | 2.68013 | 20.3341 | -2.91726 | 0.0012  | 0.15463 | <i>Hoxa13</i>             | 6  |
| ENSMUSG00000005952 | 29.5462 | 12.2416 | 23.4788 | 1.04859 | 1.94099 | 6.2818  | 21.7555 | 3.09046 | 2.78413  | 0.00122 | 0.15631 | <i>Trpv1</i>              | 11 |
| ENSMUSG00000031352 | 2087.59 | 995.338 | 2778.32 | 575.678 | 865.68  | 1223.16 | 1953.75 | 888.171 | 1.13678  | 0.00123 | 0.15631 | <i>Hccs</i>               | X  |
| ENSMUSG00000020089 | 1273.54 | 907.764 | 1352.83 | 590.358 | 701.667 | 815.736 | 1178.04 | 702.587 | 0.74487  | 0.00124 | 0.15631 | <i>Ppa1</i>               | 10 |
| ENSMUSG00000053897 | 176.258 | 250.483 | 305.224 | 974.143 | 659.936 | 217.171 | 243.988 | 617.083 | -1.33842 | 0.00124 | 0.15631 | <i>Slc39a8</i>            | 3  |
| ENSMUSG00000108419 | 6.113   | 4.70832 | 0       | 10.4859 | 26.2033 | 41.2804 | 3.60711 | 25.9899 | -2.8297  | 0.00126 | 0.15768 | <i>Gm45020</i>            | 7  |
| ENSMUSG00000015619 | 36.678  | 32.9582 | 52.5478 | 91.2276 | 74.728  | 108.585 | 40.728  | 91.5137 | -1.17377 | 0.00129 | 0.15968 | <i>Gata3</i>              | 2  |
| ENSMUSG00000098358 | 2.03767 | 0       | 0       | 2.09719 | 71.8165 | 113.072 | 0.67922 | 62.3287 | -6.51728 | 0.0013  | 0.1603  | <i>Gm27164</i>            | 9  |
| ENSMUSG00000032649 | 59.0924 | 53.6748 | 58.138  | 70.2557 | 205.745 | 136.405 | 56.9684 | 137.468 | -1.27254 | 0.00132 | 0.16248 | <i>Colgalt2</i>           | 1  |
| ENSMUSG00000005045 | 211.917 | 123.358 | 172.178 | 28.312  | 87.3444 | 87.9451 | 169.151 | 67.8672 | 1.31319  | 0.00135 | 0.16473 | <i>Chd5</i>               | 4  |
| ENSMUSG00000083505 | 28.5274 | 8.47497 | 8.9443  | 1.04859 | 0.97049 | 1.7948  | 15.3155 | 1.2713  | 3.57765  | 0.0014  | 0.1703  | <i>Gm7541</i>             | 16 |
| ENSMUSG00000042282 | 22.4143 | 16.0083 | 14.5345 | 18.8747 | 72.787  | 99.6113 | 17.6524 | 63.7577 | -1.85497 | 0.00143 | 0.17259 | <i>Gucy2f</i>             | X  |
| ENSMUSG00000023832 | 1071.81 | 797.589 | 1097.91 | 626.01  | 637.614 | 624.59  | 989.105 | 629.405 | 0.65172  | 0.00144 | 0.17294 | <i>Acat2</i>              | 17 |
| ENSMUSG00000030029 | 992.344 | 692.123 | 1029.71 | 480.256 | 567.739 | 599.463 | 904.727 | 549.152 | 0.71943  | 0.00152 | 0.18157 | <i>Lrig1</i>              | 6  |
| ENSMUSG00000096992 | 61.13   | 19.7749 | 49.1937 | 3.14578 | 11.6459 | 16.1532 | 43.3662 | 10.315  | 2.05667  | 0.00159 | 0.18833 | <i>Gm26788</i>            | 1  |
| ENSMUSG00000109870 | 2.03767 | 0       | 0       | 2.09719 | 19.4099 | 26.922  | 0.67922 | 16.143  | -4.57148 | 0.00161 | 0.19005 | <i>Gm35850</i>            | 8  |
| ENSMUSG00000035898 | 4161.94 | 1671.45 | 4382.71 | 1264.6  | 1607.14 | 2109.79 | 3405.37 | 1660.51 | 1.03592  | 0.00163 | 0.19129 | <i>Uba6</i>               | 5  |
| ENSMUSG00000031118 | 0       | 1.88333 | 0       | 3.14578 | 13.5869 | 29.6142 | 0.62778 | 15.449  | -4.54565 | 0.00166 | 0.19384 | <i>1700080O1<br/>6Rik</i> | X  |

|                    |         |         |         |         |         |         |         |         |          |         |         |                           |    |
|--------------------|---------|---------|---------|---------|---------|---------|---------|---------|----------|---------|---------|---------------------------|----|
| ENSMUSG00000027722 | 5852.18 | 2119.68 | 5132.91 | 1109.41 | 1718.74 | 2947.96 | 4368.26 | 1925.37 | 1.18168  | 0.0017  | 0.19724 | <i>Spata5</i>             | 3  |
| ENSMUSG00000107756 | 102.902 | 45.1999 | 84.9709 | 11.5345 | 34.9378 | 33.2038 | 77.691  | 26.5587 | 1.54098  | 0.00175 | 0.20117 | <i>Gm44164</i>            | 6  |
| ENSMUSG00000042303 | 2327.02 | 1067.85 | 2108.62 | 636.496 | 943.32  | 1210.59 | 1834.49 | 930.136 | 0.97935  | 0.00176 | 0.20192 | <i>Sgsm3</i>              | 15 |
| ENSMUSG00000046323 | 37.6969 | 23.5416 | 114.04  | 12.5831 | 1.94099 | 21.5376 | 58.4261 | 12.0206 | 2.27249  | 0.0018  | 0.20313 | <i>Dppa3</i>              | 6  |
| ENSMUSG00000087207 | 89.6574 | 18.8333 | 101.741 | 3.14578 | 14.5574 | 28.7168 | 70.0774 | 15.4733 | 2.16667  | 0.0018  | 0.20313 | <i>Gm13147</i>            | 4  |
| ENSMUSG00000067360 | 1.01883 | 0       | 6.70823 | 3.14578 | 39.7902 | 35.896  | 2.57569 | 26.2773 | -3.39728 | 0.00181 | 0.20313 | <i>Pramel3</i>            | X  |
| ENSMUSG00000019303 | 163.013 | 165.733 | 106.214 | 193.99  | 296.971 | 343.704 | 144.987 | 278.222 | -0.93958 | 0.00181 | 0.20313 | <i>Psmc3ip</i>            | 11 |
| ENSMUSG00000026389 | 512.473 | 563.115 | 543.367 | 1093.68 | 1021.93 | 629.974 | 539.652 | 915.196 | -0.76153 | 0.00184 | 0.20539 | <i>Steap3</i>             | 1  |
| ENSMUSG00000032690 | 275.085 | 155.374 | 150.935 | 115.345 | 83.4625 | 90.6373 | 193.798 | 96.4817 | 1.0077   | 0.00186 | 0.20646 | <i>Oas2</i>               | 5  |
| ENSMUSG00000083327 | 2275.06 | 2189.37 | 3702.94 | 1624.27 | 1641.11 | 1644.04 | 2722.46 | 1636.47 | 0.73409  | 0.00189 | 0.2073  | <i>Vcp-rs</i>             | X  |
| ENSMUSG00000097290 | 121.241 | 126.183 | 165.47  | 226.496 | 245.535 | 233.324 | 137.631 | 235.118 | -0.77467 | 0.0019  | 0.2073  | <i>1300002E1<br/>IRik</i> | 16 |
| ENSMUSG00000035877 | 1855.3  | 1340.93 | 1512.71 | 1031.82 | 1042.31 | 1014.96 | 1569.64 | 1029.69 | 0.60815  | 0.00191 | 0.2073  | <i>Zhx3</i>               | 2  |
| ENSMUSG00000028251 | 46.8664 | 78.1581 | 50.3117 | 177.212 | 116.459 | 93.3295 | 58.4454 | 129     | -1.13698 | 0.00192 | 0.2073  | <i>Tstd3</i>              | 4  |
| ENSMUSG00000073119 | 56.0359 | 34.8416 | 10.0623 | 58.7212 | 296.001 | 474.724 | 33.6466 | 276.482 | -3.03749 | 0.00193 | 0.2073  | <i>Speer4a</i>            | 5  |
| ENSMUSG00000087086 | 0       | 0.94166 | 1.11804 | 2.09719 | 14.5574 | 27.8194 | 0.68657 | 14.8247 | -4.4471  | 0.00193 | 0.2073  | <i>Gm13269</i>            | 2  |
| ENSMUSG00000030671 | 1594.48 | 498.14  | 1432.21 | 324.015 | 507.568 | 714.33  | 1174.94 | 515.305 | 1.18833  | 0.00198 | 0.21117 | <i>Pde3b</i>              | 7  |
| ENSMUSG00000025480 | 1349.95 | 629.031 | 1123.63 | 242.225 | 393.05  | 752.918 | 1034.2  | 462.731 | 1.15925  | 0.00205 | 0.21749 | <i>Syce1</i>              | 7  |
| ENSMUSG00000075268 | 118.185 | 105.466 | 88.325  | 56.624  | 48.5247 | 52.9466 | 103.992 | 52.6984 | 0.98234  | 0.00206 | 0.21754 | <i>Gm10819</i>            | 19 |

|                    |         |         |         |         |         |         |         |         |          |         |         |                           |    |
|--------------------|---------|---------|---------|---------|---------|---------|---------|---------|----------|---------|---------|---------------------------|----|
| ENSMUSG00000024493 | 2538.93 | 1516.08 | 2777.21 | 1405.11 | 1260.67 | 1390.07 | 2277.41 | 1351.95 | 0.75212  | 0.00211 | 0.22149 | <i>Lars</i>               | 18 |
| ENSMUSG00000052920 | 53.9982 | 16.0083 | 41.3674 | 14.6803 | 7.76395 | 5.3844  | 37.1246 | 9.27622 | 2.00955  | 0.00211 | 0.22149 | <i>Prkg1</i>              | 19 |
| ENSMUSG00000020000 | 39.7345 | 29.1916 | 35.7772 | 101.714 | 52.4067 | 90.6373 | 34.9011 | 81.5858 | -1.22615 | 0.00213 | 0.22174 | <i>Moxdl</i>              | 10 |
| ENSMUSG00000030291 | 1489.54 | 936.014 | 2048.25 | 671.1   | 728.841 | 1011.37 | 1491.26 | 803.77  | 0.89102  | 0.00215 | 0.22339 | <i>Med21</i>              | 6  |
| ENSMUSG00000003452 | 328.065 | 263.666 | 456.16  | 187.698 | 205.745 | 205.504 | 349.297 | 199.649 | 0.80528  | 0.0022  | 0.22676 | <i>Bicd1</i>              | 6  |
| ENSMUSG00000050174 | 174.221 | 54.6165 | 93.9152 | 29.3606 | 34.9378 | 56.5362 | 107.584 | 40.2782 | 1.41286  | 0.00222 | 0.22793 | <i>Nudt6</i>              | 3  |
| ENSMUSG00000106508 | 62.1489 | 48.9665 | 72.6725 | 16.7775 | 22.3214 | 33.2038 | 61.2626 | 24.1009 | 1.337    | 0.00225 | 0.2288  | <i>4933425M0<br/>3Rik</i> | 3  |
| ENSMUSG00000045573 | 133.467 | 111.116 | 90.5611 | 203.427 | 149.456 | 324.859 | 111.715 | 225.914 | -1.0161  | 0.00226 | 0.2288  | <i>Penk</i>               | 4  |
| ENSMUSG00000098519 | 12.226  | 3.76665 | 25.7149 | 2.09719 | 0       | 0       | 13.9025 | 0.69906 | 4.38445  | 0.00226 | 0.2288  | <i>Gm27166</i>            | 9  |
| ENSMUSG00000073608 | 4.07534 | 1.88333 | 10.0623 | 11.5345 | 38.8198 | 32.3064 | 5.34034 | 27.5536 | -2.39409 | 0.00228 | 0.2288  | <i>Gal3st2c</i>           | 1  |
| ENSMUSG00000039782 | 1250.11 | 550.873 | 1498.17 | 584.066 | 523.096 | 586.002 | 1099.72 | 564.388 | 0.96192  | 0.00228 | 0.2288  | <i>Cpeb2</i>              | 5  |
| ENSMUSG00000026819 | 810.992 | 456.707 | 921.263 | 320.87  | 361.024 | 498.057 | 729.654 | 393.317 | 0.89026  | 0.00234 | 0.23321 | <i>Slc25a25</i>           | 2  |
| ENSMUSG00000057003 | 0       | 0       | 2.23608 | 2.09719 | 3.88198 | 48.4596 | 0.74536 | 18.1462 | -4.6888  | 0.00236 | 0.23321 | <i>Myh4</i>               | 11 |
| ENSMUSG00000017737 | 12.226  | 24.4833 | 8.9443  | 77.5959 | 47.5542 | 27.8194 | 15.2179 | 50.9898 | -1.73041 | 0.00236 | 0.23321 | <i>Mmp9</i>               | 2  |
| ENSMUSG00000035367 | 1921.52 | 886.105 | 1483.64 | 654.322 | 680.316 | 986.242 | 1430.42 | 773.627 | 0.88622  | 0.00238 | 0.23376 | <i>Rmi1</i>               | 13 |
| ENSMUSG00000063172 | 837.481 | 387.965 | 707.718 | 265.294 | 311.529 | 435.239 | 644.388 | 337.354 | 0.93244  | 0.00245 | 0.23984 | <i>Hspb11</i>             | 4  |
| ENSMUSG00000096916 | 687.713 | 275.907 | 679.767 | 201.33  | 212.538 | 364.344 | 547.796 | 259.404 | 1.07689  | 0.00249 | 0.24206 | <i>Zfp850</i>             | 7  |
| ENSMUSG00000074093 | 209.88  | 187.391 | 285.1   | 512.762 | 354.23  | 333.833 | 227.457 | 400.275 | -0.81613 | 0.00251 | 0.24261 | <i>Svip</i>               | 7  |

|                    |         |         |         |         |         |         |         |         |          |         |         |                           |    |
|--------------------|---------|---------|---------|---------|---------|---------|---------|---------|----------|---------|---------|---------------------------|----|
| ENSMUSG0000009350  | 3.0565  | 71.5664 | 168.824 | 5.24297 | 2.91148 | 7.1792  | 81.1489 | 5.11121 | 3.98628  | 0.00252 | 0.24261 | <i>Mpo</i>                | 11 |
| ENSMUSG00000096950 | 46.8664 | 24.4833 | 43.6035 | 41.9437 | 96.0789 | 194.736 | 38.3177 | 110.919 | -1.53863 | 0.00253 | 0.24261 | <i>Gm9530</i>             | 1  |
| ENSMUSG00000079597 | 49.9229 | 44.2582 | 44.7215 | 240.128 | 84.433  | 57.4336 | 46.3009 | 127.331 | -1.45691 | 0.00254 | 0.24261 | <i>Gm5483</i>             | 16 |
| ENSMUSG00000033880 | 363.724 | 405.857 | 272.801 | 196.087 | 193.128 | 234.221 | 347.461 | 207.812 | 0.74196  | 0.00256 | 0.2439  | <i>Lgals3bp</i>           | 11 |
| ENSMUSG00000067562 | 4.07534 | 25.4249 | 102.86  | 2.09719 | 1.94099 | 13.461  | 44.1199 | 5.83306 | 2.90001  | 0.00259 | 0.24481 | <i>Dmrtc1c1</i>           | X  |
| ENSMUSG00000043740 | 15.2825 | 10.3583 | 10.0623 | 24.1176 | 26.2033 | 78.9712 | 11.9011 | 43.0974 | -1.86023 | 0.00265 | 0.24943 | <i>B430306N0<br/>3Rik</i> | 17 |
| ENSMUSG00000029521 | 252.671 | 239.183 | 228.08  | 591.407 | 407.607 | 292.552 | 239.978 | 430.522 | -0.84197 | 0.00267 | 0.25078 | <i>Chek2</i>              | 5  |
| ENSMUSG00000055184 | 196.635 | 87.5747 | 191.185 | 60.8184 | 66.9641 | 92.4321 | 158.465 | 73.4049 | 1.10635  | 0.0027  | 0.25218 | <i>Fam72a</i>             | 1  |
| ENSMUSG00000027605 | 2318.87 | 1064.08 | 1952.09 | 749.744 | 918.087 | 1219.57 | 1778.35 | 962.466 | 0.88526  | 0.00274 | 0.25484 | <i>Acss2</i>              | 2  |
| ENSMUSG00000113852 | 410.59  | 102.641 | 253.795 | 52.4297 | 102.872 | 141.789 | 255.675 | 99.0304 | 1.36563  | 0.00281 | 0.25875 | <i>Gm48062</i>            | 12 |
| ENSMUSG00000114610 | 102.902 | 33.8999 | 65.9642 | 18.8747 | 27.1738 | 27.8194 | 67.5888 | 24.6226 | 1.45221  | 0.00281 | 0.25875 | <i>Cyp2c52-ps</i>         | 19 |
| ENSMUSG00000026679 | 17.3202 | 13.1833 | 10.0623 | 14.6803 | 47.5542 | 88.8425 | 13.5219 | 50.359  | -1.89842 | 0.00285 | 0.26089 | <i>Enkur</i>              | 2  |
| ENSMUSG00000099145 | 7.13184 | 15.0666 | 8.9443  | 95.422  | 36.8788 | 9.87139 | 10.3809 | 47.3907 | -2.18132 | 0.00286 | 0.26089 | <i>Mir8116</i>            | 5  |
| ENSMUSG00000045104 | 2.03767 | 5.64998 | 4.47215 | 4.19437 | 4.85247 | 97.8165 | 4.05327 | 35.6211 | -3.13668 | 0.0029  | 0.264   | <i>Gm5514</i>             | 19 |
| ENSMUSG00000048960 | 113.091 | 100.758 | 93.9152 | 141.56  | 111.607 | 610.232 | 102.588 | 287.799 | -1.48917 | 0.00293 | 0.26494 | <i>Prex2</i>              | 1  |
| ENSMUSG00000062518 | 43.8099 | 8.47497 | 45.8396 | 3.14578 | 4.85247 | 11.6662 | 32.7081 | 6.55481 | 2.30076  | 0.003   | 0.26903 | <i>Zfp534</i>             | 4  |
| ENSMUSG00000036712 | 2453.35 | 1094.21 | 2418.32 | 832.583 | 1031.63 | 1318.28 | 1988.63 | 1060.83 | 0.90614  | 0.00302 | 0.26903 | <i>Cyld</i>               | 8  |
| ENSMUSG00000031998 | 5.09417 | 0.94166 | 17.8886 | 0       | 0       | 0       | 7.97481 | 0       | 5.47413  | 0.00302 | 0.26903 | <i>1700128F0<br/>8Rik</i> | 9  |

|                    |         |         |         |         |         |         |         |         |          |         |         |                  |    |
|--------------------|---------|---------|---------|---------|---------|---------|---------|---------|----------|---------|---------|------------------|----|
| ENSMUSG00000033799 | 4911.8  | 1571.64 | 4861.23 | 1145.06 | 1817.73 | 2315.29 | 3781.55 | 1759.36 | 1.10369  | 0.00302 | 0.26903 | <i>Fam208b</i>   | 13 |
| ENSMUSG00000051166 | 1908.28 | 599.84  | 1533.95 | 357.57  | 578.414 | 884.836 | 1347.35 | 606.94  | 1.14984  | 0.00306 | 0.27144 | <i>Eml5</i>      | 12 |
| ENSMUSG00000035365 | 252.671 | 154.433 | 247.086 | 408.951 | 320.263 | 390.369 | 218.063 | 373.194 | -0.77663 | 0.00311 | 0.27422 | <i>Parpbp</i>    | 10 |
| ENSMUSG00000054150 | 31.5839 | 28.2499 | 44.7215 | 117.442 | 95.1084 | 44.87   | 34.8518 | 85.8069 | -1.30108 | 0.00312 | 0.27422 | <i>Syne3</i>     | 12 |
| ENSMUSG00000025408 | 175.239 | 260.841 | 225.844 | 770.716 | 398.873 | 238.708 | 220.641 | 469.432 | -1.08804 | 0.00315 | 0.27524 | <i>Ddit3</i>     | 10 |
| ENSMUSG00000020838 | 11.2072 | 9.41664 | 17.8886 | 35.6522 | 42.7017 | 34.1012 | 12.8375 | 37.485  | -1.55556 | 0.00318 | 0.2767  | <i>Slc6a4</i>    | 11 |
| ENSMUSG00000052298 | 2678.51 | 2127.22 | 2915.84 | 1754.3  | 1608.11 | 1826.21 | 2573.86 | 1729.54 | 0.57333  | 0.00319 | 0.2767  | <i>Cdc42se2</i>  | 11 |
| ENSMUSG00000107470 | 10.1883 | 15.0666 | 168.824 | 13.6317 | 12.6164 | 9.87139 | 64.6929 | 12.0398 | 2.42402  | 0.00327 | 0.28269 | <i>Gm3375</i>    | 7  |
| ENSMUSG00000026158 | 225.162 | 222.233 | 324.231 | 618.67  | 424.106 | 336.525 | 257.209 | 459.767 | -0.83826 | 0.0033  | 0.28355 | <i>Ogfrll</i>    | 1  |
| ENSMUSG00000038893 | 727.447 | 1018.88 | 1266.74 | 3136.34 | 1920.61 | 1030.21 | 1004.35 | 2029.05 | -1.01446 | 0.00332 | 0.2848  | <i>Fam117a</i>   | 11 |
| ENSMUSG00000019295 | 1164.53 | 795.706 | 1115.8  | 654.322 | 666.729 | 673.947 | 1025.34 | 664.999 | 0.62426  | 0.00336 | 0.28524 | <i>Tmem129</i>   | 5  |
| ENSMUSG00000097532 | 100.865 | 87.5747 | 159.879 | 46.1381 | 69.8756 | 51.1518 | 116.106 | 55.7218 | 1.05588  | 0.00336 | 0.28524 | <i>Gm4349</i>    | 3  |
| ENSMUSG00000032131 | 202.748 | 274.024 | 239.26  | 797.979 | 662.847 | 181.275 | 238.677 | 547.367 | -1.19664 | 0.00339 | 0.28632 | <i>Abcg4</i>     | 9  |
| ENSMUSG00000027678 | 2241.43 | 1284.43 | 1954.33 | 1043.35 | 1141.3  | 1208.8  | 1826.73 | 1131.15 | 0.69116  | 0.0034  | 0.28632 | <i>Ncoa3</i>     | 2  |
| ENSMUSG00000069270 | 19.3578 | 15.0666 | 31.3051 | 8.38875 | 2.91148 | 1.7948  | 21.9098 | 4.36501 | 2.34689  | 0.00343 | 0.28632 | <i>Hist1h2ac</i> | 13 |
| ENSMUSG00000031904 | 1575.12 | 790.056 | 1587.61 | 612.378 | 718.165 | 887.528 | 1317.6  | 739.357 | 0.83293  | 0.00344 | 0.28632 | <i>Slc7a6</i>    | 8  |
| ENSMUSG00000069581 | 22.4143 | 22.5999 | 42.4854 | 8.38875 | 3.88198 | 10.7688 | 29.1666 | 7.67984 | 1.91718  | 0.00344 | 0.28632 | <i>Tspear</i>    | 10 |
| ENSMUSG00000038695 | 667.336 | 947.314 | 758.03  | 1717.6  | 1562.5  | 865.093 | 790.893 | 1381.73 | -0.80441 | 0.00346 | 0.28736 | <i>Josd2</i>     | 7  |

|                     |         |         |         |         |         |         |         |         |          |         |         |                           |    |
|---------------------|---------|---------|---------|---------|---------|---------|---------|---------|----------|---------|---------|---------------------------|----|
| ENSMUSG00000040687  | 1094.23 | 748.623 | 1217.54 | 560.997 | 523.096 | 757.405 | 1020.13 | 613.833 | 0.73201  | 0.00348 | 0.28736 | <i>Madd</i>               | 2  |
| ENSMUSG00000047751  | 32.6027 | 22.5999 | 70.4364 | 2.09719 | 12.6164 | 16.1532 | 41.8797 | 10.2889 | 2.00856  | 0.00349 | 0.28736 | <i>Utf1</i>               | 7  |
| ENSMUSG00000007944  | 41.7722 | 16.9499 | 25.7149 | 3.14578 | 9.70494 | 8.07659 | 28.1457 | 6.97577 | 2.00179  | 0.00356 | 0.29081 | <i>Ttc9b</i>              | 7  |
| ENSMUSG00000001964  | 1471.2  | 1260.89 | 1334.94 | 979.386 | 920.999 | 945.859 | 1355.67 | 948.748 | 0.51491  | 0.00356 | 0.29081 | <i>Emd</i>                | X  |
| ENSMUSG000000087390 | 17.3202 | 17.8916 | 8.9443  | 14.6803 | 64.0526 | 76.279  | 14.7187 | 51.6706 | -1.80912 | 0.00363 | 0.29443 | <i>Gm7598</i>             | X  |
| ENSMUSG00000003824  | 2020.35 | 1045.25 | 1876.07 | 657.468 | 785.129 | 1243.8  | 1647.22 | 895.464 | 0.87874  | 0.00363 | 0.29443 | <i>Syce2</i>              | 8  |
| ENSMUSG000000036151 | 254.708 | 94.1664 | 164.352 | 60.8184 | 65.0231 | 105.893 | 171.075 | 77.2449 | 1.14395  | 0.00365 | 0.29485 | <i>Tm6sf2</i>             | 8  |
| ENSMUSG000000040749 | 1554.74 | 645.04  | 1788.86 | 390.077 | 624.028 | 895.605 | 1329.55 | 636.57  | 1.0618   | 0.00368 | 0.29582 | <i>Siah1b</i>             | X  |
| ENSMUSG00000005501  | 2494.11 | 1655.44 | 2650.87 | 1360.03 | 1408.19 | 1567.76 | 2266.81 | 1445.32 | 0.64895  | 0.00371 | 0.2968  | <i>Usp40</i>              | 1  |
| ENSMUSG000000029148 | 5336.65 | 3854.23 | 4713.65 | 2900.41 | 2798.9  | 3547.42 | 4634.84 | 3082.24 | 0.58841  | 0.00373 | 0.2975  | <i>Nrbp1</i>              | 5  |
| ENSMUSG000000018654 | 405.496 | 214.699 | 351.064 | 994.066 | 872.474 | 277.296 | 323.753 | 714.612 | -1.14226 | 0.00375 | 0.29798 | <i>Ikzfl</i>              | 11 |
| ENSMUSG000000074971 | 40.7534 | 50.8498 | 54.7839 | 95.422  | 102.872 | 85.2529 | 48.7957 | 94.5158 | -0.95426 | 0.00378 | 0.29803 | <i>Fibin</i>              | 2  |
| ENSMUSG000000111997 | 24.452  | 19.7749 | 25.7149 | 6.29156 | 2.91148 | 8.07659 | 23.3139 | 5.75988 | 2.01075  | 0.00378 | 0.29803 | <i>Gm5176</i>             | 10 |
| ENSMUSG000000115138 | 3.0565  | 5.64998 | 8.9443  | 16.7775 | 29.1148 | 26.0246 | 5.8836  | 23.9723 | -2.03889 | 0.00387 | 0.30414 | <i>Gm36899</i>            | 15 |
| ENSMUSG000000034610 | 5460.95 | 2735.53 | 4623.09 | 2465.24 | 2256.4  | 2903.98 | 4273.19 | 2541.88 | 0.74929  | 0.00391 | 0.30495 | <i>Tut4</i>               | 4  |
| ENSMUSG000000103529 | 38.7157 | 28.2499 | 33.5411 | 175.115 | 118.4   | 21.5376 | 33.5022 | 105.018 | -1.64677 | 0.00395 | 0.30495 | <i>A730089K1<br/>6Rik</i> | 5  |
| ENSMUSG000000024502 | 1.01883 | 0       | 0       | 1.04859 | 7.76395 | 23.3324 | 0.33961 | 10.715  | -4.87499 | 0.004   | 0.30495 | <i>Jakmip2</i>            | 18 |
| ENSMUSG000000021259 | 121.241 | 125.241 | 125.22  | 147.852 | 229.037 | 307.808 | 123.901 | 228.232 | -0.88302 | 0.00401 | 0.30495 | <i>Cyp46a1</i>            | 12 |

|                     |         |         |         |         |         |         |         |         |          |         |         |                           |    |
|---------------------|---------|---------|---------|---------|---------|---------|---------|---------|----------|---------|---------|---------------------------|----|
| ENSMUSG00000046532  | 144.674 | 151.608 | 148.699 | 251.662 | 230.007 | 224.35  | 148.327 | 235.34  | -0.66536 | 0.00401 | 0.30495 | <i>Ar</i>                 | X  |
| ENSMUSG00000047344  | 122.26  | 86.6331 | 127.456 | 62.9156 | 50.4657 | 62.818  | 112.116 | 58.7331 | 0.93092  | 0.00402 | 0.30495 | <i>Lancl3</i>             | X  |
| ENSMUSG00000006200  | 98.8269 | 53.6748 | 171.06  | 30.4092 | 29.1148 | 64.6128 | 107.854 | 41.3789 | 1.37519  | 0.00402 | 0.30495 | <i>Rhox6</i>              | X  |
| ENSMUSG00000032221  | 537.944 | 598.898 | 264.975 | 1352.69 | 1151.01 | 465.75  | 467.272 | 989.814 | -1.08192 | 0.00402 | 0.30495 | <i>Mns1</i>               | 9  |
| ENSMUSG00000017861  | 423.835 | 417.157 | 403.612 | 914.373 | 859.858 | 425.367 | 414.868 | 733.199 | -0.82093 | 0.00404 | 0.30495 | <i>Mybl2</i>              | 2  |
| ENSMUSG00000086335  | 2.03767 | 0.94166 | 21.2427 | 0       | 0       | 0       | 8.07402 | 0       | 5.49147  | 0.00404 | 0.30495 | <i>Gm12107</i>            | 11 |
| ENSMUSG00000041703  | 2.03767 | 0       | 0       | 2.09719 | 8.73444 | 30.5116 | 0.67922 | 13.7811 | -4.34472 | 0.00404 | 0.30495 | <i>Zic5</i>               | 14 |
| ENSMUSG00000040649  | 3061.6  | 1556.57 | 2705.65 | 1203.78 | 1259.7  | 1775.95 | 2441.27 | 1413.15 | 0.78839  | 0.0041  | 0.30824 | <i>Rimklb</i>             | 6  |
| ENSMUSG00000086429  | 806.916 | 465.182 | 745.731 | 454.041 | 348.407 | 410.112 | 672.61  | 404.187 | 0.73443  | 0.00417 | 0.31196 | <i>Gt(ROSA)2<br/>6Sor</i> | 6  |
| ENSMUSG00000079606  | 5.09417 | 0.94166 | 7.82627 | 2.09719 | 24.2623 | 71.792  | 4.6207  | 32.7172 | -2.84466 | 0.00427 | 0.31747 | <i>Gm595</i>              | X  |
| ENSMUSG00000097233  | 139.58  | 66.8581 | 126.338 | 35.6522 | 43.6722 | 69.9972 | 110.926 | 49.7738 | 1.1503   | 0.00428 | 0.31747 | <i>Gm17552</i>            | 19 |
| ENSMUSG00000027313  | 2.03767 | 3.76665 | 14.5345 | 92.2762 | 25.2328 | 5.3844  | 6.77961 | 40.9645 | -2.60742 | 0.00429 | 0.31747 | <i>Chac1</i>              | 2  |
| ENSMUSG00000050966  | 121.241 | 57.4415 | 153.171 | 29.3606 | 40.7607 | 67.305  | 110.618 | 45.8088 | 1.26506  | 0.00436 | 0.32162 | <i>Lin28a</i>             | 4  |
| ENSMUSG00000024163  | 4680.52 | 3909.79 | 3914.25 | 2580.59 | 3249.21 | 2817.83 | 4168.19 | 2882.55 | 0.53204  | 0.0044  | 0.3239  | <i>Mapk8ip3</i>           | 17 |
| ENSMUSG000000115961 | 64.1865 | 11.3    | 46.9576 | 7.34015 | 9.70494 | 15.2558 | 40.8147 | 10.767  | 1.91277  | 0.00449 | 0.32746 | <i>Gm41409</i>            | 16 |
| ENSMUSG00000010048  | 639.828 | 625.265 | 807.224 | 1961.92 | 1391.69 | 640.743 | 690.772 | 1331.45 | -0.94659 | 0.0045  | 0.32746 | <i>Ifrd2</i>              | 9  |
| ENSMUSG00000086681  | 49.9229 | 18.8333 | 49.1937 | 11.5345 | 17.4689 | 7.1792  | 39.3166 | 12.0609 | 1.70511  | 0.0045  | 0.32746 | <i>Gm16178</i>            | 8  |
| ENSMUSG00000029848  | 496.172 | 329.582 | 1107.98 | 83.8875 | 60.1706 | 260.246 | 644.577 | 134.768 | 2.25693  | 0.00455 | 0.33026 | <i>Stra8</i>              | 6  |



|                    |         |         |         |         |         |         |         |         |          |         |         |                                 |    |
|--------------------|---------|---------|---------|---------|---------|---------|---------|---------|----------|---------|---------|---------------------------------|----|
| ENSMUSG00000052748 | 1758.51 | 947.314 | 1871.6  | 774.91  | 887.031 | 1029.32 | 1525.81 | 897.086 | 0.76572  | 0.00461 | 0.33284 | <i>Swi1</i>                     | 1  |
| ENSMUSG00000062209 | 3.0565  | 0.94166 | 3.35411 | 2.09719 | 21.3509 | 34.1012 | 2.45076 | 19.1831 | -2.99061 | 0.00472 | 0.33973 | <i>ErbB4</i>                    | 1  |
| ENSMUSG00000047547 | 153.844 | 263.666 | 159.879 | 484.45  | 370.729 | 234.221 | 192.463 | 363.133 | -0.91351 | 0.00476 | 0.34141 | <i>Cltb</i>                     | 13 |
| ENSMUSG00000045467 | 32.6027 | 30.1332 | 42.4854 | 45.0895 | 76.669  | 129.226 | 35.0738 | 83.6613 | -1.26024 | 0.00478 | 0.34141 | <i>Ttll13</i>                   | 7  |
| ENSMUSG00000058900 | 160.976 | 209.991 | 249.322 | 138.414 | 109.666 | 113.072 | 206.763 | 120.384 | 0.78064  | 0.00479 | 0.34141 | <i>Rsl1</i>                     | 13 |
| ENSMUSG00000049526 | 4.07534 | 1.88333 | 5.59019 | 14.6803 | 16.4984 | 24.2298 | 3.84962 | 18.4695 | -2.28356 | 0.00482 | 0.34151 | <i>Tmem202</i>                  | 9  |
| ENSMUSG00000054003 | 100.865 | 53.6748 | 81.6168 | 84.936  | 368.788 | 765.482 | 78.7187 | 406.402 | -2.36876 | 0.00485 | 0.34151 | <i>Tdrd9</i>                    | 12 |
| ENSMUSG00000073478 | 182.371 | 109.233 | 101.741 | 52.4297 | 81.5215 | 64.6128 | 131.115 | 66.188  | 0.98546  | 0.00486 | 0.34151 | <i>D730003I1</i><br><i>5Rik</i> | 1  |
| ENSMUSG00000050503 | 94.7516 | 63.0915 | 73.7905 | 33.555  | 31.0558 | 45.7674 | 77.2112 | 36.7927 | 1.06579  | 0.00486 | 0.34151 | <i>Fbxl22</i>                   | 9  |
| ENSMUSG00000038187 | 1736.09 | 932.247 | 1788.86 | 763.376 | 713.313 | 1091.24 | 1485.73 | 855.975 | 0.79498  | 0.00488 | 0.34151 | <i>Btbd10</i>                   | 7  |
| ENSMUSG00000029716 | 142.637 | 71.5664 | 103.978 | 401.611 | 352.289 | 69.9972 | 106.06  | 274.633 | -1.37228 | 0.00489 | 0.34151 | <i>Tfr2</i>                     | 5  |
| ENSMUSG00000090231 | 43.8099 | 9.41664 | 15.6525 | 3.14578 | 2.91148 | 7.1792  | 22.9597 | 4.41215 | 2.36641  | 0.00494 | 0.34398 | <i>Cfb</i>                      | 17 |
| ENSMUSG00000055780 | 40.7534 | 20.7166 | 46.9576 | 24.1176 | 143.633 | 159.737 | 36.1425 | 109.163 | -1.59999 | 0.00503 | 0.34711 | <i>Usp26</i>                    | X  |
| ENSMUSG00000027509 | 2191.51 | 1631.9  | 2174.58 | 1216.37 | 1292.7  | 1518.4  | 1999.33 | 1342.49 | 0.57423  | 0.00504 | 0.34711 | <i>Rae1</i>                     | 2  |
| ENSMUSG00000037818 | 656.129 | 290.974 | 809.46  | 226.496 | 273.679 | 389.471 | 585.521 | 296.549 | 0.97997  | 0.00504 | 0.34711 | <i>Abhd18</i>                   | 3  |
| ENSMUSG00000032285 | 87.6197 | 185.508 | 118.512 | 233.836 | 262.033 | 218.068 | 130.546 | 237.979 | -0.86394 | 0.00505 | 0.34711 | <i>DnajA4</i>                   | 9  |
| ENSMUSG00000063297 | 16.3013 | 31.0749 | 33.5411 | 89.1304 | 50.4657 | 54.7414 | 26.9725 | 64.7792 | -1.26313 | 0.00512 | 0.35054 | <i>Luzp2</i>                    | 7  |
| ENSMUSG00000063972 | 1357.09 | 504.732 | 1296.92 | 225.448 | 529.89  | 695.485 | 1052.91 | 483.607 | 1.1216   | 0.00517 | 0.3526  | <i>Nr6a1</i>                    | 2  |

|                    |         |         |         |         |         |         |         |         |          |         |         |                           |    |
|--------------------|---------|---------|---------|---------|---------|---------|---------|---------|----------|---------|---------|---------------------------|----|
| ENSMUSG00000079432 | 6.113   | 3.76665 | 1.11804 | 3.14578 | 24.2623 | 43.9726 | 3.6659  | 23.7936 | -2.69169 | 0.00523 | 0.35494 | <i>Gm15023</i>            | X  |
| ENSMUSG00000027233 | 166.07  | 64.9748 | 174.414 | 46.1381 | 35.9083 | 87.9451 | 135.153 | 56.6638 | 1.2492   | 0.00525 | 0.35494 | <i>Patl2</i>              | 2  |
| ENSMUSG00000022949 | 81.5067 | 64.9748 | 80.4987 | 39.8465 | 41.7312 | 31.409  | 75.6601 | 37.6623 | 1.00731  | 0.00527 | 0.35494 | <i>Clic6</i>              | 16 |
| ENSMUSG00000032344 | 238.407 | 104.525 | 195.657 | 79.6931 | 86.3739 | 109.483 | 179.529 | 91.8499 | 0.96411  | 0.00531 | 0.35494 | <i>Mb21d1</i>             | 9  |
| ENSMUSG00000113626 | 139.58  | 89.458  | 184.476 | 97.5192 | 36.8788 | 52.0492 | 137.838 | 62.149  | 1.15081  | 0.00531 | 0.35494 | <i>Gm7240</i>             | 13 |
| ENSMUSG00000074771 | 3.0565  | 10.3583 | 5.59019 | 8.38875 | 29.1148 | 49.357  | 6.335   | 28.9535 | -2.18782 | 0.00532 | 0.35494 | <i>Ankef1</i>             | 2  |
| ENSMUSG00000033174 | 144.674 | 224.116 | 220.254 | 663.759 | 427.988 | 173.198 | 196.348 | 421.648 | -1.10175 | 0.00532 | 0.35494 | <i>Mgll</i>               | 6  |
| ENSMUSG00000066175 | 63.1677 | 49.9082 | 80.4987 | 32.5064 | 23.2919 | 32.3064 | 64.5249 | 29.3682 | 1.13286  | 0.00535 | 0.3559  | <i>2510046G1<br/>ORik</i> | 7  |
| ENSMUSG00000078671 | 1635.23 | 1608.36 | 1300.28 | 1861.25 | 2544.63 | 2334.14 | 1514.62 | 2246.67 | -0.56875 | 0.00542 | 0.35717 | <i>Chd2</i>               | 7  |
| ENSMUSG00000032376 | 2626.55 | 1724.19 | 2885.66 | 1342.2  | 1444.09 | 1781.34 | 2412.13 | 1522.54 | 0.66346  | 0.00542 | 0.35717 | <i>Usp3</i>               | 9  |
| ENSMUSG00000018900 | 873.141 | 593.248 | 876.542 | 447.749 | 456.132 | 582.412 | 780.977 | 495.431 | 0.65563  | 0.00543 | 0.35717 | <i>Slc22a5</i>            | 11 |
| ENSMUSG00000045282 | 62.1489 | 122.416 | 137.519 | 290.46  | 228.066 | 136.405 | 107.361 | 218.31  | -1.02342 | 0.00545 | 0.35738 | <i>Tmem86b</i>            | 7  |
| ENSMUSG00000056055 | 53.9982 | 30.1332 | 38.0133 | 13.6317 | 14.5574 | 17.948  | 40.7149 | 15.379  | 1.40033  | 0.00549 | 0.35781 | <i>Sag</i>                | 1  |
| ENSMUSG00000108293 | 17.3202 | 7.53331 | 20.1247 | 0       | 0.97049 | 4.487   | 14.9927 | 1.81916 | 2.99488  | 0.00552 | 0.35781 | <i>Pla2g4c-ps</i>         | 7  |
| ENSMUSG00000104432 | 56.0359 | 28.2499 | 70.4364 | 6.29156 | 12.6164 | 29.6142 | 51.5741 | 16.1741 | 1.65865  | 0.00553 | 0.35781 | <i>A430027C0<br/>IRik</i> | 9  |
| ENSMUSG00000039824 | 338.253 | 295.682 | 349.946 | 210.767 | 185.364 | 238.708 | 327.96  | 211.613 | 0.63094  | 0.00554 | 0.35781 | <i>Myl6b</i>              | 10 |
| ENSMUSG00000097755 | 15.2825 | 16.0083 | 16.7706 | 67.11   | 42.7017 | 24.2298 | 16.0205 | 44.6805 | -1.47606 | 0.00557 | 0.35781 | <i>2010110K1<br/>8Rik</i> | 18 |
| ENSMUSG00000046959 | 154.863 | 120.533 | 96.1513 | 427.826 | 369.758 | 87.0477 | 123.849 | 294.877 | -1.25003 | 0.00557 | 0.35781 | <i>Slc26a1</i>            | 5  |

|                    |         |         |         |         |         |         |         |         |          |         |         |                                     |    |
|--------------------|---------|---------|---------|---------|---------|---------|---------|---------|----------|---------|---------|-------------------------------------|----|
| ENSMUSG00000021044 | 596.018 | 450.115 | 621.629 | 282.072 | 328.027 | 429.854 | 555.921 | 346.651 | 0.67985  | 0.0056  | 0.35781 | <i>Adck1</i>                        | 12 |
| ENSMUSG00000037868 | 2.03767 | 2.82499 | 1.11804 | 20.9719 | 10.6754 | 9.87139 | 1.99357 | 13.8396 | -2.77219 | 0.0056  | 0.35781 | <i>Egr2</i>                         | 10 |
| ENSMUSG00000024660 | 852.764 | 844.672 | 772.564 | 1742.76 | 1277.17 | 939.577 | 823.334 | 1319.84 | -0.68031 | 0.00561 | 0.35781 | <i>Incenp</i>                       | 19 |
| ENSMUSG00000022837 | 4951.53 | 2117.8  | 5136.27 | 1192.25 | 1762.42 | 3111.28 | 4068.53 | 2021.98 | 1.00848  | 0.00567 | 0.36079 | <i>Iqcb1</i>                        | 16 |
| ENSMUSG00000050244 | 2722.32 | 1175.2  | 2404.9  | 883.964 | 1191.77 | 1435.84 | 2100.81 | 1170.52 | 0.84341  | 0.00572 | 0.36125 | <i>Heatr1</i>                       | 13 |
| ENSMUSG00000022408 | 6.113   | 5.64998 | 6.70823 | 9.43734 | 36.8788 | 28.7168 | 6.15707 | 25.011  | -2.02836 | 0.00573 | 0.36125 | <i>Fam83f</i>                       | 15 |
| ENSMUSG00000047686 | 327.046 | 393.615 | 278.391 | 586.164 | 454.191 | 507.928 | 333.018 | 516.094 | -0.63059 | 0.00573 | 0.36125 | <i>Rtl3</i>                         | X  |
| ENSMUSG00000029054 | 7.13184 | 16.0083 | 17.8886 | 3.14578 | 1.94099 | 0.8974  | 13.6762 | 1.99472 | 2.79839  | 0.00575 | 0.36129 | <i>Gabrd</i>                        | 4  |
| ENSMUSG00000025630 | 2391.2  | 1565.04 | 3249.02 | 1507.88 | 1403.33 | 1480.71 | 2401.76 | 1463.97 | 0.71395  | 0.0058  | 0.36257 | <i>Hprt</i>                         | X  |
| ENSMUSG00000050106 | 126.335 | 162.908 | 254.913 | 683.683 | 394.02  | 157.942 | 181.385 | 411.882 | -1.18326 | 0.0058  | 0.36257 | <i>Tmc8</i>                         | 11 |
| ENSMUSG00000093223 | 40.7534 | 10.3583 | 13.4165 | 0       | 6.79346 | 3.5896  | 21.5094 | 3.46102 | 2.6215   | 0.00583 | 0.36324 | <i>Gm27903</i>                      | 15 |
| ENSMUSG00000092417 | 326.027 | 297.566 | 367.835 | 202.378 | 202.833 | 239.606 | 330.476 | 214.939 | 0.61907  | 0.00597 | 0.37053 | <i>Gpank1</i>                       | 17 |
| ENSMUSG00000069873 | 0       | 0       | 0       | 11.5345 | 7.76395 | 0.8974  | 0       | 6.73196 | -5.15465 | 0.00599 | 1       | <sup>4930438A0</sup><br><i>8Rik</i> | 11 |
| ENSMUSG00000024301 | 217.012 | 225.058 | 134.165 | 274.731 | 394.991 | 310.5   | 192.078 | 326.741 | -0.7648  | 0.006   | 0.37144 | <i>Kifc5b</i>                       | 17 |
| ENSMUSG00000032422 | 1597.53 | 1046.19 | 1594.32 | 976.24  | 856.946 | 943.167 | 1412.68 | 925.451 | 0.60993  | 0.00611 | 0.37644 | <i>Snx14</i>                        | 9  |
| ENSMUSG00000044021 | 26.4897 | 5.64998 | 19.0066 | 5.24297 | 0       | 1.7948  | 17.0488 | 2.34592 | 2.8824   | 0.00612 | 0.37644 | <i>Muc19</i>                        | 15 |
| ENSMUSG00000039410 | 84.5632 | 68.7414 | 80.4987 | 109.054 | 158.19  | 143.584 | 77.9345 | 136.943 | -0.8155  | 0.00621 | 0.38075 | <i>Prdm16</i>                       | 4  |
| ENSMUSG00000033220 | 219.049 | 284.382 | 187.83  | 830.486 | 511.45  | 178.582 | 230.421 | 506.84  | -1.1359  | 0.00625 | 0.38204 | <i>Rac2</i>                         | 15 |

|                    |         |         |         |         |         |         |         |         |          |         |         |                           |    |
|--------------------|---------|---------|---------|---------|---------|---------|---------|---------|----------|---------|---------|---------------------------|----|
| ENSMUSG00000006567 | 191.541 | 54.6165 | 95.0332 | 304.092 | 382.375 | 123.841 | 113.73  | 270.103 | -1.24796 | 0.00629 | 0.38241 | <i>Atp7b</i>              | 8  |
| ENSMUSG00000032252 | 1966.35 | 1207.21 | 1948.74 | 873.478 | 1077.25 | 1254.56 | 1707.43 | 1068.43 | 0.67583  | 0.00632 | 0.38241 | <i>Glce</i>               | 9  |
| ENSMUSG00000101397 | 73.356  | 84.7497 | 77.1446 | 33.555  | 52.4067 | 29.6142 | 78.4168 | 38.5253 | 1.02671  | 0.00632 | 0.38241 | <i>Mug-ps1</i>            | 6  |
| ENSMUSG00000051331 | 179.315 | 142.191 | 133.047 | 190.844 | 285.325 | 283.578 | 151.518 | 253.249 | -0.74168 | 0.00635 | 0.38241 | <i>Cacna1c</i>            | 6  |
| ENSMUSG00000031125 | 66.2242 | 64.0331 | 224.726 | 36.7008 | 42.7017 | 60.1258 | 118.328 | 46.5094 | 1.34201  | 0.00636 | 0.38241 | <i>3830403N1<br/>8Rik</i> | X  |
| ENSMUSG00000031362 | 312.782 | 202.458 | 579.144 | 89.1304 | 151.397 | 257.554 | 364.794 | 166.027 | 1.13291  | 0.00636 | 0.38241 | <i>Xlr4c</i>              | X  |
| ENSMUSG00000087107 | 129.392 | 108.291 | 101.741 | 520.102 | 238.741 | 79.8685 | 113.142 | 279.571 | -1.30365 | 0.0065  | 0.38941 | <i>AI662270</i>           | 11 |
| ENSMUSG00000101450 | 71.3184 | 15.0666 | 41.3674 | 10.4859 | 16.4984 | 12.5636 | 42.5841 | 13.1826 | 1.68808  | 0.00652 | 0.38941 | <i>Gm28941</i>            | 1  |
| ENSMUSG00000027556 | 10.1883 | 16.0083 | 27.951  | 118.491 | 32.0263 | 26.922  | 18.0492 | 59.1464 | -1.71419 | 0.0066  | 0.3923  | <i>Car1</i>               | 3  |
| ENSMUSG00000030041 | 2445.2  | 1594.24 | 3061.19 | 772.813 | 880.238 | 2020.05 | 2366.88 | 1224.37 | 0.95048  | 0.00662 | 0.3923  | <i>M1ap</i>               | 6  |
| ENSMUSG00000071350 | 860.915 | 397.382 | 1047.6  | 276.829 | 396.932 | 530.363 | 768.633 | 401.375 | 0.93614  | 0.00666 | 0.3923  | <i>Setdb2</i>             | 14 |
| ENSMUSG00000034203 | 504.323 | 449.174 | 590.324 | 273.683 | 402.755 | 314.09  | 514.607 | 330.176 | 0.63931  | 0.00667 | 0.3923  | <i>Chchd4</i>             | 6  |
| ENSMUSG00000022218 | 99.8457 | 38.6082 | 70.4364 | 14.6803 | 19.4099 | 43.9726 | 69.6301 | 26.0209 | 1.41116  | 0.00667 | 0.3923  | <i>Tgm1</i>               | 14 |
| ENSMUSG00000071568 | 1.01883 | 0.94166 | 3.35411 | 1.04859 | 35.9083 | 13.461  | 1.77154 | 16.806  | -3.27407 | 0.00668 | 0.3923  | <i>Gm5874</i>             | 6  |
| ENSMUSG00000100376 | 8.15067 | 5.64998 | 8.9443  | 1.04859 | 0       | 0       | 7.58165 | 0.34953 | 4.44467  | 0.0067  | 0.39253 | <i>Gm28060</i>            | 7  |
| ENSMUSG00000028955 | 4800.75 | 2991.67 | 5660.63 | 2690.69 | 2762.03 | 3050.26 | 4484.35 | 2834.33 | 0.66173  | 0.00675 | 0.39253 | <i>Vamp3</i>              | 4  |
| ENSMUSG00000030729 | 1750.36 | 714.723 | 1901.78 | 651.176 | 774.454 | 948.551 | 1455.62 | 791.394 | 0.87863  | 0.00675 | 0.39253 | <i>Pgm211</i>             | 7  |
| ENSMUSG00000112847 | 86.6009 | 48.0248 | 77.1446 | 32.5064 | 32.0263 | 35.896  | 70.5901 | 33.4762 | 1.07323  | 0.00676 | 0.39253 | <i>Gm47573</i>            | 10 |

|                    |         |         |         |         |         |         |         |         |          |         |         |                           |    |
|--------------------|---------|---------|---------|---------|---------|---------|---------|---------|----------|---------|---------|---------------------------|----|
| ENSMUSG00000075569 | 1126.83 | 308.866 | 699.892 | 175.115 | 340.643 | 463.058 | 711.863 | 326.272 | 1.12451  | 0.00681 | 0.39442 | <i>Rsph10b</i>            | 5  |
| ENSMUSG00000035916 | 3.0565  | 0.94166 | 5.59019 | 9.43734 | 17.4689 | 24.2298 | 3.19612 | 17.0453 | -2.44637 | 0.00688 | 0.39696 | <i>Ptprq</i>              | 10 |
| ENSMUSG00000039236 | 87.6197 | 150.666 | 190.066 | 507.519 | 357.142 | 115.765 | 142.784 | 326.808 | -1.19432 | 0.00689 | 0.39696 | <i>Isg20</i>              | 7  |
| ENSMUSG00000024789 | 879.254 | 907.764 | 1201.89 | 1986.04 | 1456.71 | 1234.82 | 996.303 | 1559.19 | -0.64618 | 0.00692 | 0.39726 | <i>Jak2</i>               | 19 |
| ENSMUSG00000078941 | 234.332 | 243.891 | 171.06  | 141.56  | 140.722 | 112.175 | 216.428 | 131.486 | 0.72149  | 0.00693 | 0.39726 | <i>Ak6</i>                | 13 |
| ENSMUSG00000022780 | 136.524 | 244.833 | 86.0889 | 320.87  | 286.296 | 283.578 | 155.815 | 296.914 | -0.92688 | 0.00695 | 0.39726 | <i>Meltf</i>              | 16 |
| ENSMUSG00000107178 | 69.2807 | 32.9582 | 69.3184 | 14.6803 | 17.4689 | 34.1012 | 57.1858 | 22.0835 | 1.36276  | 0.00698 | 0.39775 | <i>Gm42531</i>            | 5  |
| ENSMUSG00000027869 | 1.01883 | 0.94166 | 1.11804 | 26.2148 | 4.85247 | 4.487   | 1.02618 | 11.8514 | -3.52656 | 0.00709 | 0.40299 | <i>Hsd3b6</i>             | 3  |
| ENSMUSG00000048521 | 17.3202 | 9.41664 | 20.1247 | 2.09719 | 4.85247 | 1.7948  | 15.6205 | 2.91482 | 2.41972  | 0.00713 | 0.40329 | <i>Cxcr6</i>              | 9  |
| ENSMUSG00000097119 | 1512.97 | 752.389 | 1033.07 | 566.24  | 637.614 | 779.84  | 1099.47 | 661.232 | 0.73311  | 0.00715 | 0.40329 | <i>B230354K1<br/>7Rik</i> | 17 |
| ENSMUSG00000021676 | 168.108 | 200.574 | 209.073 | 390.077 | 273.679 | 265.63  | 192.585 | 309.795 | -0.68505 | 0.00718 | 0.40329 | <i>Iqgap2</i>             | 13 |
| ENSMUSG00000022940 | 1896.05 | 1059.37 | 2067.25 | 881.867 | 890.913 | 1240.21 | 1674.22 | 1004.33 | 0.73675  | 0.0072  | 0.40329 | <i>Pigp</i>               | 16 |
| ENSMUSG00000001510 | 1.01883 | 3.76665 | 42.4854 | 1.04859 | 0.97049 | 1.7948  | 15.757  | 1.2713  | 3.61428  | 0.00721 | 0.40329 | <i>Dlx3</i>               | 11 |
| ENSMUSG00000054434 | 87.6197 | 143.133 | 120.748 | 343.939 | 220.302 | 129.226 | 117.167 | 231.155 | -0.97813 | 0.00721 | 0.40329 | <i>Tmem120b</i>           | 5  |
| ENSMUSG00000029701 | 3003.52 | 2025.52 | 2009.11 | 1386.24 | 1665.37 | 1613.52 | 2346.05 | 1555.04 | 0.5932   | 0.00726 | 0.40395 | <i>Rbm28</i>              | 6  |
| ENSMUSG00000051499 | 147.731 | 80.9831 | 139.755 | 65.0128 | 65.9936 | 66.4076 | 122.823 | 65.8046 | 0.89815  | 0.00727 | 0.40395 | <i>Zfp786</i>             | 6  |
| ENSMUSG00000026209 | 2550.14 | 1956.78 | 2338.94 | 1607.49 | 1588.7  | 1664.68 | 2281.95 | 1620.29 | 0.49387  | 0.00729 | 0.40447 | <i>Dnpep</i>              | 1  |
| ENSMUSG00000038725 | 355.573 | 249.541 | 686.475 | 1454.4  | 954.966 | 403.83  | 430.53  | 937.731 | -1.12352 | 0.00731 | 0.40449 | <i>Pkhd11l</i>            | 15 |

|                    |         |         |         |         |         |         |         |         |          |         |         |                           |    |
|--------------------|---------|---------|---------|---------|---------|---------|---------|---------|----------|---------|---------|---------------------------|----|
| ENSMUSG00000027379 | 4386.08 | 1466.17 | 4725.95 | 1450.2  | 1729.42 | 2285.68 | 3526.07 | 1821.77 | 0.9525   | 0.00735 | 0.40527 | <i>Bub1</i>               | 2  |
| ENSMUSG00000043592 | 11.2072 | 10.3583 | 13.4165 | 62.9156 | 42.7017 | 11.6662 | 11.6606 | 39.0945 | -1.74373 | 0.00743 | 0.40782 | <i>Unc5cl</i>             | 17 |
| ENSMUSG00000058741 | 144.674 | 96.9914 | 149.817 | 40.8951 | 39.7902 | 101.406 | 130.494 | 60.6972 | 1.0985   | 0.00743 | 0.40782 | <i>Prr19</i>              | 7  |
| ENSMUSG00000103174 | 19.3578 | 1.88333 | 19.0066 | 1.04859 | 0       | 2.6922  | 13.4159 | 1.24693 | 3.39781  | 0.00748 | 0.40891 | <i>Gm37168</i>            | 1  |
| ENSMUSG00000016487 | 3275.55 | 2123.45 | 3414.49 | 1857.06 | 1916.73 | 2060.43 | 2937.83 | 1944.74 | 0.59495  | 0.00749 | 0.40891 | <i>Ppfibp1</i>            | 6  |
| ENSMUSG00000024006 | 4120.16 | 2670.56 | 4380.47 | 2381.36 | 2270.96 | 2689.51 | 3723.73 | 2447.27 | 0.60539  | 0.00759 | 0.4128  | <i>Stk38</i>              | 17 |
| ENSMUSG00000092286 | 73.356  | 30.1332 | 59.256  | 10.4859 | 11.6459 | 34.1012 | 54.2484 | 18.7443 | 1.52174  | 0.0076  | 0.4128  | <i>Dtnbos</i>             | 12 |
| ENSMUSG00000031297 | 62.1489 | 42.3749 | 64.8462 | 30.4092 | 26.2033 | 20.6402 | 56.4566 | 25.7509 | 1.13394  | 0.00769 | 0.41657 | <i>Slc7a3</i>             | X  |
| ENSMUSG00000107496 | 0       | 0       | 1.11804 | 3.14578 | 5.82296 | 15.2558 | 0.37268 | 8.07484 | -4.46673 | 0.00774 | 0.41795 | <i>4933431M0<br/>2Rik</i> | 6  |
| ENSMUSG00000068245 | 68.2619 | 26.3666 | 42.4854 | 5.24297 | 17.4689 | 22.435  | 45.7046 | 15.0489 | 1.59169  | 0.00776 | 0.41816 | <i>Phf11d</i>             | 14 |
| ENSMUSG00000025069 | 36.678  | 24.4833 | 33.5411 | 35.6522 | 80.551  | 105.893 | 31.5675 | 74.0321 | -1.2351  | 0.00783 | 0.42052 | <i>Gsto2</i>              | 19 |
| ENSMUSG00000058626 | 8.15067 | 14.125  | 4.47215 | 37.7494 | 55.3181 | 9.87139 | 8.91593 | 34.313  | -1.92989 | 0.00787 | 0.42126 | <i>Capn11</i>             | 17 |
| ENSMUSG00000028551 | 195.616 | 275.907 | 307.46  | 652.225 | 484.276 | 272.809 | 259.661 | 469.77  | -0.8548  | 0.00788 | 0.42126 | <i>Cdkn2c</i>             | 4  |
| ENSMUSG00000042433 | 8.15067 | 1.88333 | 4.47215 | 3.14578 | 30.0853 | 44.87   | 4.83538 | 26.0337 | -2.43889 | 0.0079  | 0.42138 | <i>Pih1h3b</i>            | X  |
| ENSMUSG00000029621 | 4876.14 | 3296.76 | 5520.87 | 2801.84 | 3004.65 | 3245.89 | 4564.59 | 3017.46 | 0.59698  | 0.00794 | 0.42165 | <i>Arpc1a</i>             | 5  |
| ENSMUSG00000038357 | 33.6215 | 28.2499 | 49.1937 | 160.435 | 49.4952 | 61.9206 | 37.0217 | 90.6168 | -1.29237 | 0.00795 | 0.42165 | <i>Camp</i>               | 9  |
| ENSMUSG00000025893 | 252.671 | 159.141 | 297.398 | 114.297 | 135.869 | 157.942 | 236.403 | 136.036 | 0.79434  | 0.00807 | 0.42719 | <i>Kbtbd3</i>             | 9  |
| ENSMUSG00000005968 | 602.131 | 329.582 | 603.741 | 320.87  | 277.561 | 333.833 | 511.818 | 310.754 | 0.71896  | 0.00825 | 0.43487 | <i>Tuft1</i>              | 3  |

|                    |         |         |         |         |         |         |         |         |          |         |         |                 |    |
|--------------------|---------|---------|---------|---------|---------|---------|---------|---------|----------|---------|---------|-----------------|----|
| ENSMUSG00000056758 | 1136    | 1153.54 | 1407.61 | 845.166 | 594.913 | 972.781 | 1232.38 | 804.287 | 0.6153   | 0.00826 | 0.43487 | <i>Hmga2</i>    | 10 |
| ENSMUSG00000005148 | 89.6574 | 48.9665 | 73.7905 | 133.171 | 125.194 | 122.944 | 70.8048 | 127.103 | -0.84624 | 0.00833 | 0.43735 | <i>Klf5</i>     | 14 |
| ENSMUSG00000041406 | 1607.72 | 710.956 | 1508.23 | 513.811 | 748.251 | 891.118 | 1275.64 | 717.726 | 0.82906  | 0.00835 | 0.43753 | <i>BC055324</i> | 1  |
| ENSMUSG00000046275 | 31.5839 | 10.3583 | 20.1247 | 2.09719 | 8.73444 | 2.6922  | 20.6889 | 4.50794 | 2.19442  | 0.00848 | 0.44321 | <i>Tusc5</i>    | 11 |
| ENSMUSG00000050592 | 116.147 | 185.508 | 162.116 | 471.867 | 345.496 | 132.815 | 154.59  | 316.726 | -1.03337 | 0.00859 | 0.44608 | <i>Fam78a</i>   | 2  |
| ENSMUSG00000020897 | 455.419 | 451.057 | 503.117 | 1141.92 | 770.572 | 484.596 | 469.864 | 799.029 | -0.76555 | 0.0086  | 0.44608 | <i>Aurkb</i>    | 11 |
| ENSMUSG00000030672 | 53.9982 | 50.8498 | 40.2494 | 112.199 | 104.813 | 64.6128 | 48.3658 | 93.8752 | -0.95255 | 0.00862 | 0.44608 | <i>Mylpf</i>    | 7  |
| ENSMUSG00000055296 | 2694.82 | 1673.34 | 2513.35 | 1373.66 | 1605.2  | 1588.4  | 2293.83 | 1522.42 | 0.59113  | 0.00863 | 0.44608 | <i>Tmem245</i>  | 4  |
| ENSMUSG00000041229 | 5050.36 | 2052.83 | 4038.35 | 1544.58 | 2174.88 | 2604.25 | 3713.85 | 2107.9  | 0.8169   | 0.00866 | 0.44682 | <i>Phf8</i>     | X  |
| ENSMUSG00000071745 | 0       | 0       | 0       | 4.19437 | 2.91148 | 9.87139 | 0       | 5.65908 | -4.91345 | 0.00869 | 1       | <i>DXBay18</i>  | X  |
| ENSMUSG00000037315 | 4195.56 | 1742.08 | 4283.2  | 1236.29 | 1753.68 | 2526.18 | 3406.95 | 1838.72 | 0.8895   | 0.00872 | 0.44861 | <i>Jade3</i>    | X  |
| ENSMUSG00000003410 | 33.6215 | 23.5416 | 32.4231 | 32.5064 | 76.669  | 103.201 | 29.8621 | 70.7921 | -1.25092 | 0.00875 | 0.44864 | <i>Elavl3</i>   | 9  |
| ENSMUSG00000049577 | 912.875 | 1216.63 | 971.575 | 3171.99 | 1837.14 | 892.912 | 1033.69 | 1967.35 | -0.92811 | 0.00876 | 0.44864 | <i>Zfpml</i>    | 8  |
| ENSMUSG00000035472 | 89.6574 | 129.95  | 163.234 | 498.082 | 257.181 | 104.996 | 127.614 | 286.753 | -1.16747 | 0.00883 | 0.44925 | <i>Slc25a21</i> | 12 |
| ENSMUSG00000059991 | 205.804 | 112.058 | 231.434 | 154.143 | 449.339 | 551.901 | 183.099 | 385.127 | -1.07473 | 0.00888 | 0.44925 | <i>Nptx2</i>    | 5  |
| ENSMUSG00000060332 | 2.03767 | 5.64998 | 6.70823 | 10.4859 | 19.4099 | 31.409  | 4.79863 | 20.4349 | -2.09952 | 0.00888 | 0.44925 | <i>Tmc2</i>     | 2  |
| ENSMUSG00000011257 | 2234.3  | 2889.02 | 2494.34 | 6772.86 | 4502.12 | 2302.73 | 2539.22 | 4525.9  | -0.83368 | 0.00891 | 0.44925 | <i>Pabpc4</i>   | 4  |
| ENSMUSG00000052212 | 19.3578 | 19.7749 | 14.5345 | 71.3043 | 35.9083 | 30.5116 | 17.8891 | 45.9081 | -1.35223 | 0.00893 | 0.44925 | <i>Cd177</i>    | 7  |

|                    |         |         |         |         |         |         |         |         |          |         |         |                |    |
|--------------------|---------|---------|---------|---------|---------|---------|---------|---------|----------|---------|---------|----------------|----|
| ENSMUSG00000089409 | 9.16951 | 0.94166 | 14.5345 | 0       | 0.97049 | 0       | 8.21522 | 0.3235  | 4.55601  | 0.00893 | 0.44925 | <i>Gm24884</i> | 4  |
| ENSMUSG00000025041 | 1657.64 | 1194.03 | 1807.87 | 1067.47 | 1012.23 | 1092.14 | 1553.18 | 1057.28 | 0.55452  | 0.00894 | 0.44925 | <i>Nt5c2</i>   | 19 |
| ENSMUSG00000086013 | 414.665 | 230.708 | 354.418 | 145.754 | 191.187 | 244.99  | 333.264 | 193.977 | 0.77861  | 0.00896 | 0.44925 | <i>Gm15706</i> | 6  |
| ENSMUSG00000029516 | 452.362 | 465.182 | 623.865 | 1226.85 | 730.782 | 616.513 | 513.803 | 858.05  | -0.73978 | 0.00897 | 0.44925 | <i>Cit</i>     | 5  |
| ENSMUSG00000011884 | 266.934 | 303.216 | 261.621 | 506.471 | 477.483 | 318.577 | 277.257 | 434.177 | -0.64573 | 0.00899 | 0.4493  | <i>Gltp</i>    | 5  |
| ENSMUSG00000048279 | 4325.97 | 1751.49 | 3205.42 | 1675.65 | 1821.62 | 2000.3  | 3094.29 | 1832.52 | 0.75562  | 0.00902 | 0.44958 | <i>Sacs</i>    | 14 |
| ENSMUSG00000044197 | 107.996 | 153.491 | 225.844 | 594.552 | 313.47  | 147.174 | 162.444 | 351.732 | -1.11447 | 0.00904 | 0.44958 | <i>Gpr146</i>  | 5  |
| ENSMUSG00000034640 | 1663.76 | 974.622 | 2062.78 | 832.583 | 758.926 | 1190.85 | 1567.05 | 927.453 | 0.75615  | 0.00909 | 0.45111 | <i>Tiparp</i>  | 3  |
| ENSMUSG00000020649 | 1156.38 | 1323.98 | 1634.57 | 4173.4  | 2746.5  | 1071.49 | 1371.64 | 2663.8  | -0.9575  | 0.00913 | 0.45202 | <i>Rrm2</i>    | 12 |
| ENSMUSG00000016541 | 4019.3  | 3438.96 | 4491.16 | 2953.89 | 2477.67 | 3026.93 | 3983.14 | 2819.5  | 0.49835  | 0.00929 | 0.45889 | <i>Atxn10</i>  | 15 |
| ENSMUSG00000023025 | 3229.7  | 1649.79 | 3093.61 | 1470.13 | 1693.51 | 1804.67 | 2657.7  | 1656.1  | 0.68213  | 0.00932 | 0.45921 | <i>Larp4</i>   | 15 |
| ENSMUSG00000085586 | 18.339  | 32.9582 | 15.6525 | 36.7008 | 48.5247 | 78.9712 | 22.3166 | 54.7322 | -1.28996 | 0.00942 | 0.46309 | <i>Gm11613</i> | 11 |
| ENSMUSG00000105589 | 20.3767 | 3.76665 | 15.6525 | 1.04859 | 0       | 3.5896  | 13.2653 | 1.54606 | 3.06802  | 0.00956 | 0.46748 | <i>Fbxw14</i>  | 9  |
| ENSMUSG00000035864 | 158.938 | 115.825 | 138.637 | 230.69  | 210.597 | 207.299 | 137.8   | 216.196 | -0.65032 | 0.00956 | 0.46748 | <i>Syt1</i>    | 10 |
| ENSMUSG00000006784 | 20.3767 | 22.5999 | 21.2427 | 36.7008 | 43.6722 | 65.5102 | 21.4064 | 48.6277 | -1.18623 | 0.00963 | 0.47003 | <i>Ttc25</i>   | 11 |
| ENSMUSG00000038507 | 1545.57 | 812.656 | 1604.38 | 556.803 | 707.49  | 1032.91 | 1320.87 | 765.733 | 0.78585  | 0.00967 | 0.47082 | <i>Parp12</i>  | 6  |
| ENSMUSG00000027297 | 35.6592 | 20.7166 | 21.2427 | 20.9719 | 71.8165 | 122.944 | 25.8728 | 71.9107 | -1.47784 | 0.00969 | 0.47082 | <i>Ltk</i>     | 2  |
| ENSMUSG00000045624 | 1944.95 | 983.097 | 1336.06 | 916.47  | 971.464 | 785.225 | 1421.37 | 891.053 | 0.67369  | 0.00977 | 0.4735  | <i>Esfl</i>    | 2  |



|                    |         |         |         |         |         |         |         |         |          |         |         |                                 |    |
|--------------------|---------|---------|---------|---------|---------|---------|---------|---------|----------|---------|---------|---------------------------------|----|
| ENSMUSG00000027994 | 28.5274 | 68.7414 | 17.8886 | 207.621 | 117.43  | 26.0246 | 38.3858 | 117.025 | -1.60141 | 0.00981 | 0.47407 | <i>Mcub</i>                     | 3  |
| ENSMUSG00000049755 | 1957.18 | 1256.18 | 1886.13 | 1144.02 | 1111.22 | 1189.05 | 1699.83 | 1148.09 | 0.56586  | 0.00986 | 0.47537 | <i>Zfp672</i>                   | 11 |
| ENSMUSG00000024483 | 5114.55 | 2393.71 | 3933.26 | 2065.73 | 2288.42 | 2708.35 | 3813.84 | 2354.17 | 0.69587  | 0.0099  | 0.4754  | <i>Ankhd1</i>                   | 18 |
| ENSMUSG00000059108 | 11.2072 | 13.1833 | 5.59019 | 74.4501 | 28.1443 | 9.87139 | 9.99355 | 37.4886 | -1.89498 | 0.0099  | 0.4754  | <i>Ifitm6</i>                   | 7  |
| ENSMUSG00000024758 | 6180.25 | 4498.33 | 6767.48 | 4131.46 | 3958.64 | 4040.09 | 5815.35 | 4043.4  | 0.52421  | 0.00996 | 0.47684 | <i>Rtn3</i>                     | 19 |
| ENSMUSG00000094295 | 3.0565  | 1.88333 | 0       | 5.24297 | 14.5574 | 17.948  | 1.64661 | 12.5828 | -2.91283 | 0.00998 | 0.47684 | <i>Olfir819</i>                 | 10 |
| ENSMUSG00000025877 | 9.16951 | 16.0083 | 15.6525 | 52.4297 | 23.2919 | 34.9986 | 13.6101 | 36.9067 | -1.43691 | 0.01007 | 0.47886 | <i>Hk3</i>                      | 13 |
| ENSMUSG00000011179 | 4483.89 | 4470.08 | 4838.87 | 8002.86 | 5777.35 | 5828.61 | 4597.61 | 6536.27 | -0.50754 | 0.01012 | 0.47886 | <i>Odc1</i>                     | 12 |
| ENSMUSG00000050335 | 7.13184 | 20.7166 | 5.59019 | 50.3325 | 29.1148 | 26.0246 | 11.1462 | 35.1573 | -1.63931 | 0.01013 | 0.47886 | <i>Lgals3</i>                   | 14 |
| ENSMUSG00000027496 | 430.967 | 475.54  | 527.714 | 1336.96 | 704.579 | 499.851 | 478.074 | 847.129 | -0.82491 | 0.01015 | 0.47886 | <i>Aurka</i>                    | 2  |
| ENSMUSG00000028282 | 1951.07 | 1036.77 | 1854.83 | 942.685 | 950.113 | 1157.65 | 1614.22 | 1016.81 | 0.66637  | 0.01016 | 0.47886 | <i>Casp8ap2</i>                 | 4  |
| ENSMUSG00000035246 | 127.354 | 178.916 | 234.788 | 583.018 | 340.643 | 167.814 | 180.353 | 363.825 | -1.0121  | 0.01016 | 0.47886 | <i>Pcyt1b</i>                   | X  |
| ENSMUSG00000087475 | 24.452  | 9.41664 | 26.8329 | 2.09719 | 3.88198 | 8.07659 | 20.2339 | 4.68525 | 2.08864  | 0.01025 | 0.4821  | <i>4933406I18</i><br><i>Rik</i> | 7  |
| ENSMUSG00000086493 | 2.03767 | 1.88333 | 1.11804 | 5.24297 | 7.76395 | 24.2298 | 1.67968 | 12.4122 | -2.88232 | 0.01034 | 0.48522 | <i>Gm12204</i>                  | 11 |
| ENSMUSG00000074224 | 285.274 | 92.283  | 206.837 | 39.8465 | 76.669  | 139.097 | 194.798 | 85.2042 | 1.1891   | 0.0104  | 0.48682 | <i>4932431P2</i><br><i>ORik</i> | 7  |
| ENSMUSG00000049092 | 778.389 | 270.257 | 834.056 | 157.289 | 276.591 | 462.161 | 627.568 | 298.68  | 1.06972  | 0.01043 | 0.48698 | <i>Gpr137c</i>                  | 14 |
| ENSMUSG00000033769 | 2323.96 | 1482.18 | 2326.64 | 1373.66 | 1232.53 | 1490.58 | 2044.26 | 1365.59 | 0.58177  | 0.01047 | 0.48701 | <i>Exoc6b</i>                   | 6  |
| ENSMUSG00000064061 | 5559.78 | 1992.56 | 4807.56 | 1594.91 | 2126.35 | 3010.78 | 4119.97 | 2244.01 | 0.87635  | 0.01047 | 0.48701 | <i>Dzip3</i>                    | 16 |

|                    |         |         |         |         |         |         |         |         |          |         |         |                  |    |
|--------------------|---------|---------|---------|---------|---------|---------|---------|---------|----------|---------|---------|------------------|----|
| ENSMUSG00000028331 | 188.484 | 161.966 | 176.65  | 270.537 | 248.446 | 267.425 | 175.7   | 262.136 | -0.57763 | 0.01054 | 0.48841 | <i>Trmo</i>      | 4  |
| ENSMUSG00000090098 | 23.4332 | 12.2416 | 24.5968 | 4.19437 | 4.85247 | 7.1792  | 20.0905 | 5.40868 | 1.8812   | 0.01055 | 0.48841 | <i>Alms1-ps2</i> | 6  |
| ENSMUSG00000046733 | 90.6762 | 113     | 90.5611 | 65.0128 | 55.3181 | 43.9726 | 98.079  | 54.7678 | 0.84498  | 0.01062 | 0.48952 | <i>Gprc5a</i>    | 6  |
| ENSMUSG00000037415 | 942.421 | 1369.18 | 1794.45 | 3696.29 | 2418.47 | 1343.41 | 1368.68 | 2486.06 | -0.86103 | 0.01062 | 0.48952 | <i>Ranbp10</i>   | 8  |
| ENSMUSG00000002109 | 1370.33 | 676.114 | 1207.48 | 527.442 | 603.647 | 823.813 | 1084.64 | 651.634 | 0.73436  | 0.01069 | 0.49154 | <i>Ddb2</i>      | 2  |
| ENSMUSG00000032456 | 132.448 | 245.774 | 241.496 | 563.095 | 397.902 | 210.889 | 206.573 | 390.629 | -0.91829 | 0.01077 | 0.49272 | <i>Nmnat3</i>    | 9  |
| ENSMUSG00000005802 | 2273.02 | 1323.04 | 2385.89 | 1197.49 | 1162.65 | 1470.84 | 1993.98 | 1276.99 | 0.64253  | 0.01079 | 0.49272 | <i>Slc30a4</i>   | 2  |
| ENSMUSG00000035560 | 1.01883 | 0       | 4.47215 | 4.19437 | 13.5869 | 24.2298 | 1.83033 | 14.0037 | -2.98898 | 0.01081 | 0.49272 | <i>Wdr20rt</i>   | 12 |
| ENSMUSG00000029784 | 52.9794 | 28.2499 | 45.8396 | 32.5064 | 102.872 | 186.659 | 42.3563 | 107.346 | -1.34598 | 0.01085 | 0.49272 | <i>Ssmem1</i>    | 6  |
| ENSMUSG00000030979 | 472.739 | 702.481 | 829.584 | 2217.77 | 1172.36 | 570.746 | 668.268 | 1320.29 | -0.98217 | 0.01086 | 0.49272 | <i>Uros</i>      | 7  |
| ENSMUSG00000001089 | 3400.87 | 1474.65 | 2476.45 | 1012.94 | 1470.3  | 1795.7  | 2450.66 | 1426.31 | 0.78058  | 0.01086 | 0.49272 | <i>Luzp1</i>     | 4  |
| ENSMUSG00000049124 | 127.354 | 160.083 | 133.047 | 308.286 | 260.092 | 153.455 | 140.161 | 240.611 | -0.77734 | 0.01094 | 0.49332 | <i>Gm8186</i>    | 17 |
| ENSMUSG00000021209 | 1238.9  | 357.832 | 1425.5  | 148.9   | 250.387 | 460.366 | 1007.41 | 286.551 | 1.81329  | 0.01094 | 0.49332 | <i>Ppp4r4</i>    | 12 |
| ENSMUSG00000072889 | 3222.57 | 1740.19 | 3289.27 | 1312.84 | 1677.01 | 2078.38 | 2750.68 | 1689.41 | 0.70294  | 0.01094 | 0.49332 | <i>Nfxl1</i>     | 5  |
| ENSMUSG00000045842 | 1.01883 | 7.53331 | 4.47215 | 3.14578 | 3.88198 | 85.2529 | 4.34143 | 30.7602 | -2.82266 | 0.01103 | 0.49504 | <i>Tgif2-ps2</i> | 17 |
| ENSMUSG00000000440 | 220.068 | 50.8498 | 207.955 | 38.7979 | 66.9641 | 95.1243 | 159.624 | 66.9621 | 1.24924  | 0.01104 | 0.49504 | <i>Pparg</i>     | 6  |
| ENSMUSG00000025498 | 122.26  | 91.3414 | 72.6725 | 61.867  | 48.5247 | 43.0752 | 95.4246 | 51.1556 | 0.90339  | 0.01106 | 0.49504 | <i>Irf7</i>      | 7  |
| ENSMUSG00000080935 | 32.6027 | 15.0666 | 31.3051 | 6.29156 | 12.6164 | 5.3844  | 26.3248 | 8.09746 | 1.69884  | 0.01111 | 0.49504 | <i>Got2-ps1</i>  | 5  |

|                    |         |         |         |         |         |         |         |         |          |         |         |                 |    |
|--------------------|---------|---------|---------|---------|---------|---------|---------|---------|----------|---------|---------|-----------------|----|
| ENSMUSG00000031367 | 1561.87 | 709.073 | 1845.88 | 610.281 | 782.218 | 948.551 | 1372.28 | 780.35  | 0.81376  | 0.01115 | 0.49504 | <i>Ap1s2</i>    | X  |
| ENSMUSG00000028640 | 15.2825 | 15.0666 | 29.069  | 3.14578 | 0.97049 | 8.97399 | 19.806  | 4.36342 | 2.16088  | 0.01117 | 0.49504 | <i>Tfap2c</i>   | 2  |
| ENSMUSG00000107096 | 393.27  | 209.991 | 462.868 | 192.941 | 169.836 | 249.477 | 355.376 | 204.085 | 0.79832  | 0.01117 | 0.49504 | <i>Gm43597</i>  | 5  |
| ENSMUSG00000039954 | 3.0565  | 5.64998 | 6.70823 | 28.312  | 22.3214 | 9.87139 | 5.13824 | 20.1683 | -1.97208 | 0.01117 | 0.49504 | <i>Stk32a</i>   | 18 |
| ENSMUSG00000030086 | 810.992 | 472.715 | 949.214 | 297.8   | 386.257 | 595.873 | 744.307 | 426.643 | 0.80155  | 0.01122 | 0.49622 | <i>Chchd6</i>   | 6  |
| ENSMUSG00000031659 | 444.212 | 332.407 | 410.32  | 1170.23 | 744.369 | 329.346 | 395.646 | 747.981 | -0.91841 | 0.01129 | 0.49741 | <i>Adcy7</i>    | 8  |
| ENSMUSG00000022805 | 11.2072 | 1.88333 | 2.23608 | 5.24297 | 34.9378 | 34.9986 | 5.10886 | 25.0598 | -2.29707 | 0.0113  | 0.49741 | <i>Maats1</i>   | 16 |
| ENSMUSG00000100199 | 248.595 | 92.283  | 115.158 | 67.11   | 35.9083 | 103.201 | 152.012 | 68.7397 | 1.14303  | 0.01132 | 0.49741 | <i>Gm20324</i>  | 15 |
| ENSMUSG00000042312 | 49.9229 | 80.0414 | 43.6035 | 115.345 | 104.813 | 98.7139 | 57.8559 | 106.291 | -0.87183 | 0.01138 | 0.49859 | <i>Sl100a13</i> | 3  |
| ENSMUSG00000028078 | 1433.5  | 592.306 | 1347.24 | 502.276 | 622.087 | 802.275 | 1124.35 | 642.213 | 0.80728  | 0.0114  | 0.49859 | <i>Dclk2</i>    | 3  |
| ENSMUSG00000026348 | 19.3578 | 17.8916 | 23.4788 | 76.5473 | 34.9378 | 34.9986 | 20.2428 | 48.8279 | -1.26943 | 0.01145 | 0.49989 | <i>Acmsd</i>    | 1  |
| ENSMUSG00000073077 | 18.339  | 14.125  | 12.2984 | 20.9719 | 36.8788 | 61.9206 | 14.9208 | 39.9237 | -1.42277 | 0.01152 | 0.50192 | <i>Gm7173</i>   | X  |
| ENSMUSG00000037573 | 808.954 | 1011.35 | 822.876 | 1174.42 | 1187.88 | 1336.23 | 881.059 | 1232.85 | -0.48446 | 0.01162 | 0.50341 | <i>Tob1</i>     | 11 |
| ENSMUSG00000087523 | 34.6404 | 46.1415 | 31.3051 | 49.2839 | 86.3739 | 90.6373 | 37.3623 | 75.4317 | -1.01246 | 0.01163 | 0.50341 | <i>Gm12319</i>  | 11 |
| ENSMUSG00000038518 | 2700.93 | 1959.6  | 2788.39 | 1572.89 | 1736.21 | 1881.85 | 2482.97 | 1730.32 | 0.52073  | 0.01165 | 0.50341 | <i>Jarid2</i>   | 13 |
| ENSMUSG00000034127 | 70.2995 | 88.5164 | 183.358 | 470.818 | 205.745 | 109.483 | 114.058 | 262.015 | -1.20065 | 0.01167 | 0.50341 | <i>Tspan8</i>   | 10 |
| ENSMUSG00000025876 | 146.712 | 159.141 | 159.879 | 108.005 | 73.7575 | 103.201 | 155.244 | 94.9879 | 0.70903  | 0.01168 | 0.50341 | <i>Unc5a</i>    | 13 |
| ENSMUSG00000024539 | 2029.52 | 1313.62 | 1782.15 | 1170.23 | 1008.34 | 1294.05 | 1708.43 | 1157.54 | 0.56134  | 0.0117  | 0.50354 | <i>Ptpn2</i>    | 18 |

|                    |         |         |         |         |         |         |         |         |          |         |         |                           |    |
|--------------------|---------|---------|---------|---------|---------|---------|---------|---------|----------|---------|---------|---------------------------|----|
| ENSMUSG00000036292 | 68.2619 | 91.3414 | 79.3807 | 108.005 | 128.105 | 178.582 | 79.6613 | 138.231 | -0.79611 | 0.01174 | 0.50354 | <i>Gramd1c</i>            | 16 |
| ENSMUSG00000098661 | 1.01883 | 5.64998 | 1.11804 | 22.0205 | 13.5869 | 8.97399 | 2.59562 | 14.8605 | -2.48228 | 0.01175 | 0.50354 | <i>Mir7052</i>            | 7  |
| ENSMUSG00000039252 | 203.767 | 205.283 | 111.804 | 303.043 | 281.443 | 269.22  | 173.618 | 284.569 | -0.71027 | 0.01182 | 0.50392 | <i>Lgi2</i>               | 5  |
| ENSMUSG00000035133 | 4927.08 | 2407.83 | 5612.55 | 2186.32 | 2367.03 | 3169.61 | 4315.82 | 2574.32 | 0.74524  | 0.01183 | 0.50392 | <i>Arhgap5</i>            | 12 |
| ENSMUSG00000020262 | 1097.28 | 556.523 | 897.785 | 299.898 | 541.536 | 627.282 | 850.531 | 489.572 | 0.7959   | 0.01183 | 0.50392 | <i>Adarb1</i>             | 10 |
| ENSMUSG00000029269 | 2.03767 | 0       | 0       | 1.04859 | 9.70494 | 21.5376 | 0.67922 | 10.7637 | -3.98827 | 0.01187 | 0.50431 | <i>Sult1b1</i>            | 5  |
| ENSMUSG00000043991 | 560.359 | 385.14  | 624.983 | 320.87  | 372.67  | 335.627 | 523.494 | 343.056 | 0.60875  | 0.0119  | 0.50453 | <i>Pura</i>               | 18 |
| ENSMUSG00000000253 | 496.172 | 886.105 | 796.043 | 2011.2  | 1260.67 | 698.177 | 726.107 | 1323.35 | -0.86556 | 0.01192 | 0.50453 | <i>Gmpr</i>               | 13 |
| ENSMUSG00000079845 | 426.891 | 287.207 | 717.78  | 195.038 | 216.42  | 365.242 | 477.293 | 258.9   | 0.88053  | 0.01198 | 0.50604 | <i>Xlr4a</i>              | X  |
| ENSMUSG00000115422 | 0       | 0       | 0       | 1.04859 | 2.91148 | 13.461  | 0       | 5.80702 | -4.95374 | 0.01201 | 1       | <i>4930452G1<br/>3Rik</i> | 14 |
| ENSMUSG00000033054 | 2289.32 | 1162.01 | 2596.08 | 1150.31 | 1135.48 | 1408.92 | 2015.81 | 1231.57 | 0.7105   | 0.01208 | 0.50902 | <i>Npat</i>               | 9  |
| ENSMUSG00000021798 | 24.452  | 19.7749 | 8.9443  | 31.4578 | 44.6427 | 56.5362 | 17.7238 | 44.2122 | -1.3142  | 0.01214 | 0.50932 | <i>Ldb3</i>               | 14 |
| ENSMUSG00000068859 | 4.07534 | 2.82499 | 5.59019 | 3.14578 | 26.2033 | 31.409  | 4.16351 | 20.2527 | -2.29691 | 0.01216 | 0.50932 | <i>Sp9</i>                | 2  |
| ENSMUSG00000021697 | 83.5444 | 85.6914 | 201.247 | 428.875 | 205.745 | 148.071 | 123.494 | 260.897 | -1.08035 | 0.01216 | 0.50932 | <i>Depdc1b</i>            | 13 |
| ENSMUSG00000102151 | 35.6592 | 14.125  | 26.8329 | 10.4859 | 6.79346 | 7.1792  | 25.539  | 8.15286 | 1.64973  | 0.01231 | 0.51286 | <i>Gm37472</i>            | 14 |
| ENSMUSG00000003992 | 576.66  | 649.748 | 600.386 | 824.194 | 848.212 | 827.402 | 608.931 | 833.269 | -0.45229 | 0.01231 | 0.51286 | <i>Ssbp2</i>              | 13 |
| ENSMUSG00000031715 | 6842.49 | 3790.2  | 7271.72 | 3464.55 | 3648.09 | 4355.08 | 5968.13 | 3822.57 | 0.6426   | 0.01232 | 0.51286 | <i>Smarca5</i>            | 8  |
| ENSMUSG00000038267 | 251.652 | 201.516 | 323.113 | 674.245 | 377.522 | 302.424 | 258.76  | 451.397 | -0.8029  | 0.01235 | 0.51314 | <i>Slc22a23</i>           | 13 |

|                    |         |         |         |         |         |         |         |         |          |         |         |                           |    |
|--------------------|---------|---------|---------|---------|---------|---------|---------|---------|----------|---------|---------|---------------------------|----|
| ENSMUSG00000020181 | 187.465 | 58.3831 | 193.421 | 71.3043 | 69.8756 | 71.792  | 146.423 | 70.9906 | 1.04231  | 0.0125  | 0.51847 | <i>Nav3</i>               | 10 |
| ENSMUSG00000042510 | 26.4897 | 66.8581 | 57.0199 | 257.954 | 114.518 | 33.2038 | 50.1226 | 135.225 | -1.42939 | 0.01253 | 0.51859 | <i>AA986860</i>           | 1  |
| ENSMUSG00000042476 | 194.597 | 159.141 | 260.503 | 1106.27 | 842.389 | 182.172 | 204.747 | 710.276 | -1.79464 | 0.01261 | 0.52096 | <i>Abcb4</i>              | 5  |
| ENSMUSG00000056445 | 8.15067 | 15.0666 | 6.70823 | 38.7979 | 28.1443 | 20.6402 | 9.97517 | 29.1942 | -1.53485 | 0.01273 | 0.52471 | <i>Hoxaas2</i>            | 6  |
| ENSMUSG00000038425 | 341.309 | 251.424 | 287.336 | 318.772 | 518.244 | 561.772 | 293.356 | 466.263 | -0.66957 | 0.01277 | 0.52484 | <i>Poli</i>               | 18 |
| ENSMUSG00000036966 | 737.636 | 612.081 | 820.64  | 468.721 | 456.132 | 573.438 | 723.452 | 499.43  | 0.53365  | 0.0128  | 0.52484 | <i>Spryd3</i>             | 15 |
| ENSMUSG00000036985 | 739.673 | 672.348 | 796.043 | 527.442 | 522.126 | 547.414 | 736.021 | 532.327 | 0.46695  | 0.01281 | 0.52484 | <i>Zdhhc9</i>             | X  |
| ENSMUSG00000002076 | 922.045 | 439.757 | 920.145 | 169.872 | 363.935 | 613.821 | 760.649 | 382.543 | 0.99035  | 0.01286 | 0.52564 | <i>Hsf2bp</i>             | 17 |
| ENSMUSG00000074580 | 127.354 | 87.5747 | 121.866 | 34.6036 | 47.5542 | 87.9451 | 112.265 | 56.701  | 0.97928  | 0.01288 | 0.52564 | <i>4931440P2<br/>2Rik</i> | 3  |
| ENSMUSG00000047040 | 5.09417 | 5.64998 | 7.82627 | 25.1662 | 21.3509 | 15.2558 | 6.19014 | 20.591  | -1.7372  | 0.01294 | 0.52639 | <i>Prr15l</i>             | 11 |
| ENSMUSG00000027702 | 156.9   | 106.408 | 204.601 | 74.4501 | 61.1411 | 116.662 | 155.97  | 84.0844 | 0.88717  | 0.01295 | 0.52639 | <i>Lrrc34</i>             | 3  |
| ENSMUSG00000024027 | 6.113   | 0.94166 | 8.9443  | 0       | 0       | 0       | 5.33299 | 0       | 4.895    | 0.01297 | 1       | <i>Glp1r</i>              | 17 |
| ENSMUSG00000112569 | 1.01883 | 11.3    | 6.70823 | 76.5473 | 17.4689 | 4.487   | 6.34234 | 32.8344 | -2.36206 | 0.01302 | 0.52834 | <i>Gm33111</i>            | 12 |
| ENSMUSG00000099338 | 3.0565  | 11.3    | 10.0623 | 57.6726 | 28.1443 | 8.07659 | 8.1396  | 31.2978 | -1.93737 | 0.01306 | 0.52893 | <i>2810030D1<br/>2Rik</i> | 8  |
| ENSMUSG00000097857 | 23.4332 | 3.76665 | 10.0623 | 2.09719 | 0       | 2.6922  | 12.4207 | 1.59646 | 2.95133  | 0.01308 | 0.52895 | <i>Gm26603</i>            | 2  |
| ENSMUSG00000030850 | 1521.12 | 1099.86 | 1556.31 | 919.616 | 1007.37 | 1003.29 | 1392.43 | 976.76  | 0.51111  | 0.01322 | 0.53345 | <i>Ate1</i>               | 7  |
| ENSMUSG00000012126 | 87.6197 | 165.733 | 102.86  | 181.407 | 203.804 | 214.478 | 118.737 | 199.896 | -0.74933 | 0.01327 | 0.53388 | <i>Ubxn11</i>             | 4  |
| ENSMUSG00000025324 | 168.108 | 122.416 | 188.948 | 99.6164 | 88.3149 | 104.098 | 159.824 | 97.3432 | 0.71319  | 0.01328 | 0.53388 | <i>Atp10a</i>             | 7  |

|                    |         |         |         |         |         |         |         |         |          |         |         |                           |    |
|--------------------|---------|---------|---------|---------|---------|---------|---------|---------|----------|---------|---------|---------------------------|----|
| ENSMUSG00000055403 | 224.143 | 102.641 | 320.877 | 37.7494 | 87.3444 | 158.84  | 215.887 | 94.6445 | 1.18557  | 0.01337 | 0.5351  | <i>4933427D0<br/>6Rik</i> | 6  |
| ENSMUSG00000013629 | 1608.74 | 1345.64 | 1896.19 | 1018.18 | 1250    | 1141.49 | 1616.86 | 1136.56 | 0.50811  | 0.01344 | 0.5351  | <i>Cad</i>                | 5  |
| ENSMUSG00000038056 | 7837.89 | 2978.48 | 6345.98 | 2827.01 | 3311.32 | 3986.25 | 5720.79 | 3374.86 | 0.76127  | 0.01346 | 0.5351  | <i>Kmt2c</i>              | 5  |
| ENSMUSG00000078160 | 153.844 | 72.5081 | 144.227 | 65.0128 | 76.669  | 57.4336 | 123.526 | 66.3718 | 0.89472  | 0.01347 | 0.5351  | <i>Gm16503</i>            | 4  |
| ENSMUSG00000079467 | 89.6574 | 57.4415 | 114.04  | 31.4578 | 41.7312 | 57.4336 | 87.0463 | 43.5409 | 0.99249  | 0.01347 | 0.5351  | <i>Gm14966</i>            | 19 |
| ENSMUSG00000114853 | 28.5274 | 7.53331 | 22.3608 | 0       | 2.91148 | 8.07659 | 19.4738 | 3.66269 | 2.38033  | 0.01348 | 0.5351  | <i>D030051J2<br/>1Rik</i> | 14 |
| ENSMUSG00000001120 | 628.621 | 465.182 | 569.081 | 327.161 | 360.053 | 440.623 | 554.295 | 375.946 | 0.55899  | 0.01354 | 0.5351  | <i>Pcbp3</i>              | 10 |
| ENSMUSG00000040738 | 1936.8  | 1434.15 | 2421.67 | 1283.48 | 1282.02 | 1372.12 | 1930.88 | 1312.54 | 0.55653  | 0.01355 | 0.5351  | <i>Ints8</i>              | 4  |
| ENSMUSG00000062591 | 143.656 | 129.95  | 110.686 | 91.2276 | 65.0231 | 74.4842 | 128.097 | 76.9116 | 0.7384   | 0.01355 | 0.5351  | <i>Tubb4a</i>             | 17 |
| ENSMUSG00000002068 | 392.251 | 385.14  | 431.563 | 827.34  | 746.31  | 389.471 | 402.985 | 654.374 | -0.69896 | 0.01357 | 0.53513 | <i>Ccne1</i>              | 7  |
| ENSMUSG00000031170 | 157.919 | 239.183 | 282.864 | 859.846 | 417.312 | 167.814 | 226.655 | 481.657 | -1.08703 | 0.01366 | 0.53666 | <i>Slc38a5</i>            | X  |
| ENSMUSG00000039611 | 303.613 | 217.524 | 230.316 | 178.261 | 162.072 | 148.968 | 250.484 | 163.101 | 0.61972  | 0.01368 | 0.53666 | <i>Tmem246</i>            | 4  |
| ENSMUSG00000005649 | 15.2825 | 8.47497 | 19.0066 | 3.14578 | 0.97049 | 4.487   | 14.2547 | 2.86776 | 2.3013   | 0.01369 | 0.53666 | <i>Cabp5</i>              | 7  |
| ENSMUSG00000026833 | 1886.88 | 2754.37 | 2978.45 | 1932.56 | 1362.57 | 1796.59 | 2539.9  | 1697.24 | 0.58158  | 0.01372 | 0.53677 | <i>Olfm1</i>              | 2  |
| ENSMUSG00000014907 | 843.595 | 535.807 | 932.444 | 535.831 | 417.312 | 542.927 | 770.615 | 498.69  | 0.62726  | 0.01379 | 0.53739 | <i>Naf1</i>               | 8  |
| ENSMUSG00000075704 | 207.842 | 381.374 | 383.487 | 983.58  | 642.467 | 271.015 | 324.234 | 632.354 | -0.96316 | 0.01381 | 0.53739 | <i>Txnrd2</i>             | 16 |
| ENSMUSG00000046603 | 336.215 | 203.399 | 400.258 | 164.629 | 198.951 | 208.197 | 313.291 | 190.592 | 0.7149   | 0.01381 | 0.53739 | <i>Tcaim</i>              | 9  |
| ENSMUSG00000021171 | 3495.62 | 1884.27 | 3756.61 | 1934.65 | 1953.6  | 1997.61 | 3045.5  | 1961.96 | 0.6342   | 0.01392 | 0.53881 | <i>Esyt2</i>              | 12 |

|                    |         |         |         |         |         |         |         |         |          |         |         |                           |    |
|--------------------|---------|---------|---------|---------|---------|---------|---------|---------|----------|---------|---------|---------------------------|----|
| ENSMUSG00000041718 | 4007.07 | 1399.31 | 4163.57 | 943.734 | 1558.61 | 2443.62 | 3189.99 | 1648.66 | 0.95197  | 0.01393 | 0.53881 | <i>Alg13</i>              | X  |
| ENSMUSG00000116589 | 92.7139 | 18.8333 | 44.7215 | 5.24297 | 15.5279 | 28.7168 | 52.0896 | 16.4959 | 1.64877  | 0.01393 | 0.53881 | <i>CT030190.1</i>         | 16 |
| ENSMUSG00000001228 | 1796.2  | 1598.94 | 1867.12 | 2579.54 | 2699.91 | 2035.3  | 1754.09 | 2438.25 | -0.47514 | 0.01399 | 0.53967 | <i>Uhrf1</i>              | 17 |
| ENSMUSG00000054945 | 102.902 | 68.7414 | 105.096 | 40.8951 | 55.3181 | 55.6388 | 92.2464 | 50.6173 | 0.86152  | 0.014   | 0.53967 | <i>Gm9958</i>             | 5  |
| ENSMUSG00000024867 | 77.4314 | 145.016 | 147.581 | 450.895 | 191.187 | 126.533 | 123.343 | 256.205 | -1.0534  | 0.01404 | 0.54023 | <i>Pip5k1b</i>            | 19 |
| ENSMUSG00000071753 | 0       | 0       | 0       | 5.24297 | 5.82296 | 3.5896  | 0       | 4.88518 | -4.69593 | 0.0141  | 1       | <i>C230004F1<br/>8Rik</i> | X  |
| ENSMUSG00000029330 | 100.865 | 110.175 | 163.234 | 177.212 | 204.774 | 222.555 | 124.758 | 201.514 | -0.69503 | 0.01412 | 0.54241 | <i>Cds1</i>               | 5  |
| ENSMUSG00000007656 | 2522.63 | 2163.94 | 3091.38 | 1832.94 | 1761.45 | 1956.33 | 2592.65 | 1850.24 | 0.48646  | 0.01422 | 0.54522 | <i>Arpp19</i>             | 9  |
| ENSMUSG00000106173 | 0       | 0       | 0       | 1.04859 | 2.91148 | 12.5636 | 0       | 5.50789 | -4.87745 | 0.01429 | 1       | <i>Gm42764</i>            | 5  |
| ENSMUSG00000036752 | 3256.19 | 3105.61 | 3574.37 | 5781.94 | 4634.11 | 3754.72 | 3312.06 | 4723.59 | -0.51211 | 0.01436 | 0.54958 | <i>Tubb4b</i>             | 2  |
| ENSMUSG00000069300 | 57.0547 | 21.6583 | 16.7706 | 11.5345 | 8.73444 | 11.6662 | 31.8278 | 10.6451 | 1.5812   | 0.01442 | 0.55074 | <i>Hist1h2bj</i>          | 13 |
| ENSMUSG00000040729 | 857.858 | 272.141 | 651.816 | 208.67  | 284.355 | 439.726 | 593.938 | 310.917 | 0.93256  | 0.01452 | 0.55253 | <i>Cep126</i>             | 9  |
| ENSMUSG00000031824 | 676.506 | 452.94  | 640.636 | 331.355 | 414.401 | 436.136 | 590.027 | 393.964 | 0.58158  | 0.01452 | 0.55253 | <i>6430548M0<br/>8Rik</i> | 8  |
| ENSMUSG00000109536 | 171.164 | 75.3331 | 150.935 | 61.867  | 85.4035 | 66.4076 | 132.477 | 71.226  | 0.89308  | 0.01469 | 0.55741 | <i>9330162G0<br/>2Rik</i> | 7  |
| ENSMUSG00000033943 | 5505.78 | 2709.17 | 4895.89 | 2163.25 | 2818.31 | 3245    | 4370.28 | 2742.19 | 0.67222  | 0.0147  | 0.55741 | <i>Mga</i>                | 2  |
| ENSMUSG00000114891 | 20.3767 | 0.94166 | 6.70823 | 0       | 0.97049 | 0.8974  | 9.34219 | 0.62263 | 3.87334  | 0.01477 | 0.55906 | <i>Gm47272</i>            | 18 |
| ENSMUSG00000110177 | 6.113   | 0       | 12.2984 | 0       | 0       | 0       | 6.13714 | 0       | 5.09765  | 0.01482 | 1       | <i>Gm6524</i>             | 8  |
| ENSMUSG00000044465 | 2783.45 | 1484.06 | 2284.15 | 1153.45 | 1361.6  | 1698.78 | 2183.89 | 1404.61 | 0.63639  | 0.01487 | 0.56174 | <i>Fam160a2</i>           | 7  |

|                    |         |         |         |         |         |         |         |         |          |         |         |                |    |
|--------------------|---------|---------|---------|---------|---------|---------|---------|---------|----------|---------|---------|----------------|----|
| ENSMUSG00000030717 | 69.2807 | 45.1999 | 41.3674 | 19.9233 | 19.4099 | 32.3064 | 51.9493 | 23.8798 | 1.11714  | 0.01492 | 0.56224 | <i>Nupr1</i>   | 7  |
| ENSMUSG00000034543 | 4939.31 | 2455.86 | 4286.56 | 1912.63 | 2400.03 | 3006.29 | 3893.91 | 2439.65 | 0.67434  | 0.01494 | 0.56224 | <i>Morc2a</i>  | 11 |
| ENSMUSG00000038115 | 24.452  | 17.8916 | 33.5411 | 12.5831 | 5.82296 | 7.1792  | 25.2949 | 8.52843 | 1.57261  | 0.01501 | 0.56396 | <i>Ano2</i>    | 6  |
| ENSMUSG00000067261 | 1.01883 | 0       | 0       | 6.29156 | 4.85247 | 8.07659 | 0.33961 | 6.40687 | -4.12811 | 0.01519 | 1       | <i>Foxd3</i>   | 4  |
| ENSMUSG00000078498 | 16.3013 | 11.3    | 46.9576 | 7.34015 | 5.82296 | 8.07659 | 24.853  | 7.0799  | 1.8032   | 0.01521 | 0.56938 | <i>Zfp988</i>  | 4  |
| ENSMUSG00000091834 | 49.9229 | 18.8333 | 20.1247 | 9.43734 | 14.5574 | 3.5896  | 29.6269 | 9.19478 | 1.69465  | 0.01521 | 0.56938 | <i>Gm17177</i> | 13 |
| ENSMUSG00000004677 | 3901.12 | 2489.76 | 3128.27 | 1784.71 | 2296.19 | 2419.39 | 3173.05 | 2166.76 | 0.55013  | 0.01526 | 0.57038 | <i>Myo9b</i>   | 8  |
| ENSMUSG00000032187 | 5327.48 | 4170.63 | 5106.08 | 3327.19 | 3468.54 | 3901    | 4868.06 | 3565.58 | 0.44908  | 0.0154  | 0.57422 | <i>Smarca4</i> | 9  |
| ENSMUSG00000020273 | 1469.16 | 672.348 | 1513.82 | 605.038 | 652.172 | 922.527 | 1218.44 | 726.579 | 0.74519  | 0.01558 | 0.57925 | <i>Papalg</i>  | 11 |
| ENSMUSG00000029787 | 1767.68 | 1030.18 | 1935.32 | 1046.5  | 995.727 | 1069.7  | 1577.73 | 1037.31 | 0.60465  | 0.01559 | 0.57925 | <i>Avl9</i>    | 6  |
| ENSMUSG00000019992 | 173.202 | 109.233 | 146.463 | 224.399 | 219.332 | 221.658 | 142.966 | 221.796 | -0.63489 | 0.01574 | 0.58236 | <i>Mtfr2</i>   | 10 |
| ENSMUSG00000034218 | 2473.73 | 712.839 | 1838.05 | 620.767 | 989.904 | 1099.31 | 1674.87 | 903.328 | 0.89035  | 0.01576 | 0.58236 | <i>Atm</i>     | 9  |
| ENSMUSG00000015880 | 884.348 | 492.49  | 1005.12 | 1291.87 | 1181.09 | 1230.33 | 793.985 | 1234.43 | -0.6373  | 0.01579 | 0.58236 | <i>Ncapg</i>   | 5  |
| ENSMUSG00000038843 | 144.674 | 121.475 | 282.864 | 675.294 | 310.558 | 166.916 | 183.004 | 384.256 | -1.07076 | 0.0158  | 0.58236 | <i>Gcnt1</i>   | 19 |
| ENSMUSG00000042554 | 4.07534 | 1.88333 | 14.5345 | 0       | 0.97049 | 0       | 6.83105 | 0.3235  | 4.28783  | 0.01581 | 1       | <i>Zp3r</i>    | 1  |
| ENSMUSG00000025089 | 15.2825 | 6.59165 | 11.1804 | 49.2839 | 16.4984 | 29.6142 | 11.0182 | 31.7988 | -1.53083 | 0.01581 | 0.58236 | <i>Gfra1</i>   | 19 |
| ENSMUSG00000033392 | 2381.01 | 1509.49 | 2918.08 | 1323.32 | 1350.93 | 1740.06 | 2269.53 | 1471.44 | 0.62478  | 0.01586 | 0.58262 | <i>Clasp2</i>  | 9  |
| ENSMUSG00000002633 | 6.113   | 15.0666 | 23.4788 | 2.09719 | 3.88198 | 3.5896  | 14.8861 | 3.18959 | 2.21152  | 0.01587 | 0.58262 | <i>Shh</i>     | 5  |



|                    |         |         |         |         |         |         |         |         |          |         |         |                                 |    |
|--------------------|---------|---------|---------|---------|---------|---------|---------|---------|----------|---------|---------|---------------------------------|----|
| ENSMUSG00000045374 | 453.381 | 607.373 | 551.193 | 1018.18 | 853.064 | 584.207 | 537.316 | 818.485 | -0.60652 | 0.01592 | 0.58326 | <i>Wdr81</i>                    | 11 |
| ENSMUSG00000029428 | 671.412 | 767.456 | 883.25  | 1944.09 | 1356.75 | 675.742 | 774.039 | 1325.53 | -0.77586 | 0.01606 | 0.58677 | <i>Stx2</i>                     | 5  |
| ENSMUSG00000027074 | 1086.08 | 1313.62 | 1413.2  | 3305.17 | 1898.29 | 1220.46 | 1270.97 | 2141.3  | -0.75237 | 0.01607 | 0.58677 | <i>Slc43a3</i>                  | 2  |
| ENSMUSG00000029458 | 1428.41 | 1050.9  | 1463.51 | 887.11  | 953.025 | 967.397 | 1314.27 | 935.844 | 0.48948  | 0.01623 | 0.59153 | <i>Brap</i>                     | 5  |
| ENSMUSG00000004460 | 3102.35 | 1939.83 | 2209.24 | 1415.6  | 1639.16 | 1881.85 | 2417.14 | 1645.54 | 0.55454  | 0.01636 | 0.59399 | <i>Dnajb11</i>                  | 16 |
| ENSMUSG00000103788 | 12.226  | 15.0666 | 55.9019 | 139.463 | 92.1969 | 19.7428 | 27.7315 | 83.8009 | -1.60053 | 0.01636 | 0.59399 | <i>Gm37527</i>                  | 6  |
| ENSMUSG00000029776 | 1858.35 | 1678.99 | 2277.44 | 1415.6  | 1344.13 | 1460.97 | 1938.26 | 1406.9  | 0.46195  | 0.01641 | 0.59399 | <i>Hibadh</i>                   | 6  |
| ENSMUSG00000063445 | 245.539 | 387.965 | 301.87  | 479.207 | 531.831 | 400.24  | 311.792 | 470.426 | -0.59233 | 0.01641 | 0.59399 | <i>Nmrall</i>                   | 16 |
| ENSMUSG00000031931 | 1484.44 | 678.939 | 1489.23 | 586.164 | 749.221 | 875.862 | 1217.54 | 737.082 | 0.72343  | 0.01646 | 0.5947  | <i>Ankrd49</i>                  | 9  |
| ENSMUSG00000036117 | 0       | 0       | 0       | 4.19437 | 2.91148 | 7.1792  | 0       | 4.76168 | -4.66299 | 0.0165  | 1       | <i>Il5</i>                      | 11 |
| ENSMUSG00000038292 | 383.082 | 193.041 | 315.287 | 90.179  | 196.04  | 207.299 | 297.136 | 164.506 | 0.85067  | 0.01661 | 0.59915 | <i>Ccdc155</i>                  | 7  |
| ENSMUSG00000020467 | 71.3184 | 58.3831 | 73.7905 | 111.151 | 99.9609 | 124.739 | 67.8307 | 111.95  | -0.72545 | 0.01673 | 0.601   | <i>Efemp1</i>                   | 11 |
| ENSMUSG00000042826 | 1433.5  | 1599.89 | 1215.31 | 1031.82 | 1111.22 | 927.014 | 1416.23 | 1023.35 | 0.46918  | 0.01674 | 0.601   | <i>Fgf11</i>                    | 11 |
| ENSMUSG00000109724 | 124.298 | 197.749 | 508.707 | 139.463 | 161.102 | 106.791 | 276.918 | 135.785 | 1.02721  | 0.01675 | 0.601   | <i>Gm18194</i>                  | 7  |
| ENSMUSG00000050705 | 1935.78 | 1066.9  | 1918.55 | 697.314 | 996.697 | 1329.95 | 1640.41 | 1007.99 | 0.70201  | 0.01685 | 0.60146 | <i>2310061104</i><br><i>Rik</i> | 17 |
| ENSMUSG00000025977 | 337.234 | 133.716 | 371.189 | 67.11   | 93.1674 | 234.221 | 280.713 | 131.5   | 1.09091  | 0.01686 | 0.60146 | <i>Boll</i>                     | 1  |
| ENSMUSG00000020261 | 458.475 | 454.824 | 385.723 | 519.054 | 677.405 | 645.23  | 433.007 | 613.896 | -0.50349 | 0.01688 | 0.60146 | <i>Slc36a1</i>                  | 11 |
| ENSMUSG00000042682 | 1551.68 | 1363.53 | 1653.58 | 1069.57 | 1030.66 | 1243.8  | 1522.93 | 1114.68 | 0.44983  | 0.01689 | 0.60146 | <i>Selenok</i>                  | 14 |

|                    |         |         |         |         |         |         |         |         |          |         |         |                 |    |
|--------------------|---------|---------|---------|---------|---------|---------|---------|---------|----------|---------|---------|-----------------|----|
| ENSMUSG00000054252 | 336.215 | 266.491 | 334.293 | 162.532 | 222.243 | 235.119 | 312.333 | 206.631 | 0.59401  | 0.01691 | 0.60146 | <i>Fgfr3</i>    | 5  |
| ENSMUSG00000086480 | 27.5085 | 17.8916 | 5.59019 | 1.04859 | 1.94099 | 7.1792  | 16.9968 | 3.38959 | 2.30547  | 0.01696 | 0.6018  | <i>Gm15287</i>  | 13 |
| ENSMUSG00000058019 | 35.6592 | 5.64998 | 25.7149 | 7.34015 | 3.88198 | 6.2818  | 22.3413 | 5.83464 | 1.93533  | 0.01698 | 0.6018  | <i>Ces5a</i>    | 8  |
| ENSMUSG00000037617 | 473.758 | 306.982 | 282.864 | 202.378 | 203.804 | 269.22  | 354.535 | 225.134 | 0.65452  | 0.01706 | 0.60363 | <i>Spagl</i>    | 15 |
| ENSMUSG00000020669 | 93.7327 | 159.141 | 181.122 | 525.345 | 208.656 | 145.379 | 144.665 | 293.127 | -1.01798 | 0.01711 | 0.60451 | <i>Sh3yl1</i>   | 12 |
| ENSMUSG00000108319 | 0       | 0       | 0       | 1.04859 | 2.91148 | 11.6662 | 0       | 5.20876 | -4.79687 | 0.01712 | 1       | <i>Gm44552</i>  | 7  |
| ENSMUSG00000031109 | 526.737 | 461.415 | 556.783 | 411.049 | 337.732 | 346.396 | 514.978 | 365.059 | 0.49646  | 0.01717 | 0.60491 | <i>Enox2</i>    | X  |
| ENSMUSG00000037426 | 1597.53 | 971.797 | 1494.82 | 700.46  | 887.031 | 1082.26 | 1354.72 | 889.918 | 0.60562  | 0.01719 | 0.60491 | <i>Depdc5</i>   | 5  |
| ENSMUSG00000102030 | 17.3202 | 16.9499 | 15.6525 | 2.09719 | 3.88198 | 7.1792  | 16.6409 | 4.38612 | 1.90684  | 0.01725 | 0.60491 | <i>Gm29106</i>  | 1  |
| ENSMUSG00000052525 | 735.598 | 321.107 | 963.749 | 162.532 | 301.824 | 543.824 | 673.485 | 336.06  | 1.0015   | 0.01727 | 0.60491 | <i>Spdya</i>    | 17 |
| ENSMUSG00000103598 | 12.226  | 6.59165 | 1.11804 | 1.04859 | 0       | 0       | 6.64523 | 0.34953 | 4.26106  | 0.01733 | 1       | <i>Gm4856</i>   | 3  |
| ENSMUSG00000048264 | 2229.21 | 1122.46 | 2145.52 | 878.721 | 1141.3  | 1409.81 | 1832.4  | 1143.28 | 0.68009  | 0.01736 | 0.60491 | <i>Dip2c</i>    | 13 |
| ENSMUSG00000039155 | 66.2242 | 17.8916 | 26.8329 | 20.9719 | 5.82296 | 9.87139 | 36.9829 | 12.2221 | 1.60456  | 0.01739 | 0.60491 | <i>Cdh26</i>    | 2  |
| ENSMUSG00000020423 | 384.1   | 771.223 | 780.391 | 1903.2  | 1044.25 | 623.693 | 645.238 | 1190.38 | -0.88323 | 0.01739 | 0.60491 | <i>Btg2</i>     | 1  |
| ENSMUSG00000047014 | 20.3767 | 5.64998 | 24.5968 | 1.04859 | 1.94099 | 7.1792  | 16.8745 | 3.38959 | 2.28636  | 0.01741 | 0.60491 | <i>Catsperb</i> | 12 |
| ENSMUSG00000002944 | 132.448 | 106.408 | 223.608 | 327.161 | 222.243 | 234.221 | 154.155 | 261.208 | -0.76296 | 0.01741 | 0.60491 | <i>Cd36</i>     | 5  |
| ENSMUSG00000010592 | 10144.5 | 3425.77 | 13290.1 | 1381    | 2346.65 | 4791.22 | 8953.47 | 2839.62 | 1.65669  | 0.01741 | 0.60491 | <i>Dazl</i>     | 17 |
| ENSMUSG00000033904 | 3675.95 | 1428.5  | 2906.9  | 1183.86 | 1653.72 | 1922.23 | 2670.45 | 1586.6  | 0.75088  | 0.01745 | 0.60505 | <i>Ccp110</i>   | 7  |

|                    |         |         |         |         |         |         |         |         |          |         |         |                |    |
|--------------------|---------|---------|---------|---------|---------|---------|---------|---------|----------|---------|---------|----------------|----|
| ENSMUSG00000078737 | 10.1883 | 2.82499 | 5.59019 | 1.04859 | 0       | 0       | 6.20117 | 0.34953 | 4.15509  | 0.01754 | 1       | <i>Gm2128</i>  | 7  |
| ENSMUSG00000074637 | 13.2448 | 19.7749 | 52.5478 | 3.14578 | 6.79346 | 14.3584 | 28.5225 | 8.09921 | 1.79793  | 0.01756 | 0.60649 | <i>Sox2</i>    | 3  |
| ENSMUSG00000070735 | 1827.79 | 546.165 | 1210.84 | 364.91  | 567.739 | 934.193 | 1194.93 | 622.281 | 0.94066  | 0.01759 | 0.60649 | <i>Msh5</i>    | 17 |
| ENSMUSG00000030031 | 260.821 | 105.466 | 317.523 | 116.394 | 130.046 | 126.533 | 227.937 | 124.324 | 0.8725   | 0.01761 | 0.60649 | <i>Kbtbd8</i>  | 6  |
| ENSMUSG00000074656 | 3589.35 | 2480.34 | 4095.37 | 2412.81 | 2087.53 | 2512.72 | 3388.36 | 2337.69 | 0.53533  | 0.01761 | 0.60649 | <i>Eif2s2</i>  | 2  |
| ENSMUSG00000053289 | 3800.25 | 1661.09 | 3652.63 | 1171.28 | 1597.43 | 2492.98 | 3037.99 | 1753.9  | 0.79225  | 0.01766 | 0.60649 | <i>Ddx10</i>   | 9  |
| ENSMUSG00000081965 | 187.465 | 21.6583 | 62.6101 | 19.9233 | 48.5247 | 28.7168 | 90.5779 | 32.3882 | 1.48204  | 0.01766 | 0.60649 | <i>Gm11620</i> | 11 |
| ENSMUSG00000097818 | 1.01883 | 3.76665 | 10.0623 | 0       | 0       | 0       | 4.94928 | 0       | 4.78777  | 0.01769 | 1       | <i>Gm26681</i> | 2  |
| ENSMUSG00000074235 | 0       | 0.94166 | 0       | 10.4859 | 1.94099 | 7.1792  | 0.31389 | 6.53537 | -4.15316 | 0.01777 | 1       | <i>Gm10649</i> | 8  |
| ENSMUSG00000041912 | 1642.36 | 580.065 | 1362.89 | 333.453 | 620.146 | 939.577 | 1195.1  | 631.058 | 0.92058  | 0.01778 | 0.6095  | <i>Tdrkh</i>   | 3  |
| ENSMUSG00000027287 | 1328.56 | 971.797 | 1271.21 | 916.47  | 854.035 | 787.019 | 1190.52 | 852.508 | 0.48174  | 0.01793 | 0.61358 | <i>Snap23</i>  | 2  |
| ENSMUSG00000030655 | 9563.79 | 4205.47 | 7077.18 | 3500.2  | 4640.9  | 4951.85 | 6948.82 | 4364.32 | 0.67092  | 0.01799 | 0.61448 | <i>Smg1</i>    | 7  |
| ENSMUSG00000087351 | 36.678  | 12.2416 | 24.5968 | 7.34015 | 6.79346 | 9.87139 | 24.5055 | 8.00167 | 1.60827  | 0.01806 | 0.61572 | <i>Gm11464</i> | 2  |
| ENSMUSG00000024691 | 461.532 | 398.324 | 478.52  | 1070.61 | 648.29  | 457.674 | 446.125 | 725.526 | -0.70116 | 0.01808 | 0.61572 | <i>Fam111a</i> | 19 |
| ENSMUSG00000020183 | 88.6386 | 116.766 | 154.289 | 58.7212 | 78.61   | 71.792  | 119.898 | 69.7077 | 0.77959  | 0.01813 | 0.6163  | <i>Cpm</i>     | 10 |
| ENSMUSG00000113768 | 1.01883 | 2.82499 | 11.1804 | 0       | 0       | 0       | 5.00807 | 0       | 4.80336  | 0.01813 | 1       | <i>Gm9237</i>  | 12 |
| ENSMUSG00000030688 | 585.83  | 753.331 | 466.222 | 955.268 | 1268.44 | 645.23  | 601.794 | 956.311 | -0.66743 | 0.01819 | 0.61724 | <i>Stard10</i> | 7  |
| ENSMUSG00000026688 | 480.89  | 1103.63 | 613.803 | 2081.46 | 1324.72 | 675.742 | 732.774 | 1360.64 | -0.89223 | 0.0183  | 0.62012 | <i>Mgst3</i>   | 1  |

|                     |         |         |         |         |         |         |         |         |          |         |         |                           |    |
|---------------------|---------|---------|---------|---------|---------|---------|---------|---------|----------|---------|---------|---------------------------|----|
| ENSMUSG00000073633  | 183.39  | 114.883 | 181.122 | 70.2557 | 92.1969 | 119.354 | 159.798 | 93.9356 | 0.76246  | 0.01835 | 0.62026 | <i>Fbxo36</i>             | 1  |
| ENSMUSG00000050702  | 18.339  | 10.3583 | 13.4165 | 13.6317 | 24.2623 | 92.4321 | 14.0379 | 43.4421 | -1.63593 | 0.01839 | 0.62026 | <i>4930563M2<br/>IRik</i> | 9  |
| ENSMUSG00000053916  | 5.09417 | 16.0083 | 4.47215 | 35.6522 | 10.6754 | 40.383  | 8.52487 | 28.9035 | -1.7474  | 0.0184  | 0.62026 | <i>Nanp</i>               | 2  |
| ENSMUSG00000041147  | 5123.72 | 1574.46 | 3955.62 | 1292.92 | 1944.87 | 2622.2  | 3551.27 | 1953.33 | 0.86219  | 0.01842 | 0.62026 | <i>Brca2</i>              | 5  |
| ENSMUSG00000097613  | 148.75  | 48.0248 | 110.686 | 27.2634 | 36.8788 | 74.4842 | 102.487 | 46.2088 | 1.14325  | 0.01846 | 0.62045 | <i>Gm17597</i>            | 15 |
| ENSMUSG00000070336  | 1333.65 | 399.265 | 1078.91 | 234.885 | 468.749 | 717.022 | 937.275 | 473.552 | 0.98409  | 0.01863 | 0.62493 | <i>Fbxo47</i>             | 11 |
| ENSMUSG00000036095  | 98.8269 | 38.6082 | 51.4298 | 22.0205 | 18.4394 | 42.1778 | 62.955  | 27.5459 | 1.18702  | 0.01865 | 0.62493 | <i>Dgkb</i>               | 12 |
| ENSMUSG00000016024  | 114.109 | 129.95  | 117.394 | 155.192 | 103.843 | 513.312 | 120.484 | 257.449 | -1.09648 | 0.01875 | 0.62707 | <i>Lbp</i>                | 2  |
| ENSMUSG000000112381 | 29.5462 | 12.2416 | 16.7706 | 4.19437 | 4.85247 | 8.07659 | 19.5195 | 5.70781 | 1.76361  | 0.01895 | 0.63179 | <i>Gm8170</i>             | 10 |
| ENSMUSG00000027860  | 338.253 | 342.766 | 432.681 | 714.092 | 528.919 | 430.752 | 371.233 | 557.921 | -0.58762 | 0.01896 | 0.63179 | <i>Vangl1</i>             | 3  |
| ENSMUSG00000020021  | 1280.67 | 590.423 | 1263.38 | 653.274 | 615.293 | 698.177 | 1044.83 | 655.581 | 0.67193  | 0.01902 | 0.63179 | <i>Fgd6</i>               | 10 |
| ENSMUSG00000077416  | 0       | 0       | 0       | 2.09719 | 3.88198 | 8.07659 | 0       | 4.68525 | -4.64216 | 0.01906 | 1       | <i>Gm23747</i>            | 15 |
| ENSMUSG00000086573  | 4.07534 | 1.88333 | 7.82627 | 0       | 0       | 0       | 4.59498 | 0       | 4.68027  | 0.01907 | 1       | <i>Gm15384</i>            | X  |
| ENSMUSG00000050944  | 158.938 | 66.8581 | 163.234 | 31.4578 | 74.728  | 83.4581 | 129.677 | 63.2147 | 1.03155  | 0.01909 | 0.63179 | <i>Efcab5</i>             | 11 |
| ENSMUSG00000026418  | 735.598 | 750.506 | 646.226 | 642.788 | 365.876 | 406.522 | 710.777 | 471.729 | 0.59248  | 0.0191  | 0.63179 | <i>Tnni1</i>              | 1  |
| ENSMUSG00000038372  | 597.037 | 255.191 | 594.796 | 197.136 | 250.387 | 375.113 | 482.341 | 274.212 | 0.81309  | 0.0191  | 0.63179 | <i>Gmds</i>               | 13 |
| ENSMUSG00000038418  | 236.369 | 187.391 | 183.358 | 382.737 | 305.706 | 240.503 | 202.373 | 309.648 | -0.61233 | 0.01914 | 0.63179 | <i>Egr1</i>               | 18 |
| ENSMUSG00000031432  | 623.526 | 455.765 | 500.881 | 615.524 | 845.3   | 820.223 | 526.724 | 760.349 | -0.53011 | 0.01915 | 0.63179 | <i>Prps1</i>              | X  |

|                    |         |         |         |         |         |         |         |         |          |         |         |                 |    |
|--------------------|---------|---------|---------|---------|---------|---------|---------|---------|----------|---------|---------|-----------------|----|
| ENSMUSG00000027715 | 1320.41 | 1211.92 | 1689.36 | 3699.44 | 2038.04 | 1351.48 | 1407.23 | 2362.99 | -0.74769 | 0.01916 | 0.63179 | <i>Ccna2</i>    | 3  |
| ENSMUSG00000033998 | 82.5255 | 79.0997 | 51.4298 | 48.2353 | 29.1148 | 34.9986 | 71.0183 | 37.4496 | 0.92841  | 0.01929 | 0.63504 | <i>Kcnk1</i>    | 8  |
| ENSMUSG00000101838 | 16.3013 | 7.53331 | 15.6525 | 3.14578 | 3.88198 | 1.7948  | 13.1624 | 2.94085 | 2.16592  | 0.01934 | 0.63558 | <i>Gm18800</i>  | 1  |
| ENSMUSG00000032261 | 683.638 | 417.157 | 648.462 | 292.557 | 334.82  | 487.288 | 583.086 | 371.555 | 0.64872  | 0.01937 | 0.63566 | <i>Sh3bgrl2</i> | 9  |
| ENSMUSG00000004655 | 487.003 | 539.573 | 724.489 | 2677.06 | 2203.02 | 480.109 | 583.688 | 1786.73 | -1.61405 | 0.01943 | 0.63594 | <i>Aqp1</i>     | 6  |
| ENSMUSG00000063810 | 3051.41 | 976.505 | 2281.92 | 671.1   | 1069.48 | 1662.88 | 2103.28 | 1134.49 | 0.89022  | 0.01944 | 0.63594 | <i>Alms1</i>    | 6  |
| ENSMUSG00000002346 | 1047.36 | 557.465 | 1035.3  | 606.087 | 559.004 | 561.772 | 880.043 | 575.621 | 0.61204  | 0.01959 | 0.63976 | <i>Slc25a42</i> | 8  |
| ENSMUSG00000048787 | 695.864 | 389.849 | 641.754 | 318.772 | 382.375 | 424.47  | 575.822 | 375.206 | 0.6168   | 0.0197  | 0.64113 | <i>Dcun1d3</i>  | 7  |
| ENSMUSG00000045275 | 218.03  | 187.391 | 158.761 | 167.775 | 327.056 | 507.928 | 188.061 | 334.253 | -0.83055 | 0.01972 | 0.64113 | <i>Lca5l</i>    | 16 |
| ENSMUSG00000041708 | 8.15067 | 6.59165 | 13.4165 | 10.4859 | 32.9968 | 41.2804 | 9.38626 | 28.2544 | -1.60337 | 0.01972 | 0.64113 | <i>Mpped1</i>   | 15 |
| ENSMUSG00000022018 | 377.987 | 462.357 | 550.075 | 1556.11 | 850.153 | 308.705 | 463.473 | 904.99  | -0.96512 | 0.01984 | 0.64382 | <i>Rgcc</i>     | 14 |
| ENSMUSG00000109957 | 0       | 1.88333 | 0       | 22.0205 | 5.82296 | 0.8974  | 0.62778 | 9.58027 | -3.85729 | 0.01994 | 0.64546 | <i>Gm45353</i>  | 8  |
| ENSMUSG00000037533 | 2677.5  | 1211.92 | 2554.72 | 1129.33 | 1306.28 | 1590.19 | 2148.04 | 1341.94 | 0.67836  | 0.01995 | 0.64546 | <i>Rapgef6</i>  | 11 |
| ENSMUSG00000113905 | 10.1883 | 0.94166 | 3.35411 | 0       | 0       | 0       | 4.82804 | 0       | 4.75621  | 0.01996 | 1       | <i>Gm48872</i>  | 13 |
| ENSMUSG00000055407 | 6.113   | 1.88333 | 2.23608 | 4.19437 | 14.5574 | 30.5116 | 3.4108  | 16.4211 | -2.27402 | 0.02    | 0.64554 | <i>Map6</i>     | 7  |
| ENSMUSG00000006057 | 1146.19 | 1281.6  | 1390.84 | 1093.68 | 845.3   | 802.275 | 1272.88 | 913.753 | 0.47853  | 0.02002 | 0.64554 | <i>Atp5g1</i>   | 11 |
| ENSMUSG00000085304 | 0       | 0       | 0       | 3.14578 | 0.97049 | 10.7688 | 0       | 4.96169 | -4.7251  | 0.02008 | 1       | <i>Gm12802</i>  | 4  |
| ENSMUSG00000066151 | 1642.36 | 1009.46 | 1446.74 | 960.511 | 896.736 | 996.113 | 1366.19 | 951.12  | 0.52217  | 0.02008 | 0.64556 | <i>Fkbp15</i>   | 4  |

|                    |         |         |         |         |         |         |         |         |          |         |         |                 |    |
|--------------------|---------|---------|---------|---------|---------|---------|---------|---------|----------|---------|---------|-----------------|----|
| ENSMUSG00000027833 | 8.15067 | 0       | 2.23608 | 14.6803 | 20.3804 | 14.3584 | 3.46225 | 16.473  | -2.25827 | 0.02011 | 0.64556 | <i>Shox2</i>    | 3  |
| ENSMUSG00000026404 | 252.671 | 222.233 | 197.893 | 283.12  | 328.997 | 365.242 | 224.265 | 325.786 | -0.53887 | 0.02012 | 0.64556 | <i>Ddx59</i>    | 1  |
| ENSMUSG00000090523 | 764.125 | 972.739 | 1122.51 | 2722.15 | 1368.4  | 883.041 | 953.125 | 1657.86 | -0.79839 | 0.02016 | 0.64556 | <i>Gypc</i>     | 18 |
| ENSMUSG00000117284 | 737.636 | 484.015 | 898.903 | 495.985 | 404.696 | 496.262 | 706.851 | 465.647 | 0.60145  | 0.02017 | 0.64556 | <i>Gm7072</i>   | 17 |
| ENSMUSG00000083038 | 11.2072 | 4.70832 | 12.2984 | 0       | 1.94099 | 1.7948  | 9.40464 | 1.24526 | 2.88411  | 0.0202  | 0.64556 | <i>Gm13233</i>  | 4  |
| ENSMUSG00000036167 | 1664.77 | 1022.65 | 1857.06 | 902.839 | 940.409 | 1178.29 | 1514.83 | 1007.18 | 0.5883   | 0.02026 | 0.64626 | <i>Pphln1</i>   | 15 |
| ENSMUSG00000030704 | 3611.77 | 3266.63 | 5610.32 | 3239.1  | 2546.58 | 2685.02 | 4162.9  | 2823.57 | 0.55999  | 0.0203  | 0.64668 | <i>Rab6a</i>    | 7  |
| ENSMUSG00000105044 | 39.7345 | 32.9582 | 34.6592 | 15.7289 | 10.6754 | 20.6402 | 35.784  | 15.6815 | 1.18652  | 0.0204  | 0.64875 | <i>Gm10416</i>  | 5  |
| ENSMUSG00000010803 | 20.3767 | 18.8333 | 13.4165 | 37.7494 | 33.9673 | 43.0752 | 17.5421 | 38.2639 | -1.12181 | 0.02048 | 0.65001 | <i>Gabral</i>   | 11 |
| ENSMUSG00000026622 | 317.876 | 253.308 | 421.5   | 477.11  | 493.981 | 488.185 | 330.895 | 486.426 | -0.55745 | 0.0205  | 0.65001 | <i>Nek2</i>     | 1  |
| ENSMUSG00000034730 | 107.996 | 123.358 | 84.9709 | 135.269 | 180.512 | 185.762 | 105.442 | 167.181 | -0.66371 | 0.02066 | 0.65276 | <i>Adgrb1</i>   | 15 |
| ENSMUSG00000024169 | 1197.13 | 1257.12 | 1443.39 | 3196.11 | 1862.38 | 1252.77 | 1299.21 | 2103.75 | -0.69516 | 0.02066 | 0.65276 | <i>Ift140</i>   | 17 |
| ENSMUSG00000041225 | 2719.27 | 2050    | 2606.15 | 1707.11 | 1787.65 | 1933    | 2458.47 | 1809.25 | 0.44213  | 0.02071 | 0.65276 | <i>Arhgap12</i> | 18 |
| ENSMUSG00000106870 | 259.803 | 131.833 | 219.135 | 119.54  | 104.813 | 144.481 | 203.59  | 122.945 | 0.72566  | 0.02073 | 0.65276 | <i>Gm43681</i>  | 5  |
| ENSMUSG00000111521 | 42.791  | 23.5416 | 55.9019 | 16.7775 | 10.6754 | 23.3324 | 40.7448 | 16.9284 | 1.25945  | 0.02074 | 0.65276 | <i>Gm48529</i>  | 9  |
| ENSMUSG00000024145 | 250.633 | 178.916 | 329.821 | 162.532 | 134.899 | 179.48  | 253.123 | 158.97  | 0.66901  | 0.02081 | 0.65365 | <i>Pigf</i>     | 17 |
| ENSMUSG00000031644 | 2516.52 | 1233.58 | 2715.71 | 1048.59 | 1361.6  | 1618.01 | 2155.27 | 1342.74 | 0.6823   | 0.02086 | 0.65365 | <i>Nek1</i>     | 8  |
| ENSMUSG00000023952 | 1266.41 | 1436.98 | 1398.67 | 2644.55 | 2145.76 | 1351.48 | 1367.35 | 2047.27 | -0.58206 | 0.02087 | 0.65365 | <i>Gtpbp2</i>   | 17 |

|                    |         |         |         |         |         |         |         |         |          |         |         |                           |    |
|--------------------|---------|---------|---------|---------|---------|---------|---------|---------|----------|---------|---------|---------------------------|----|
| ENSMUSG00000038383 | 1234.83 | 992.513 | 1064.37 | 790.639 | 853.064 | 795.993 | 1097.24 | 813.232 | 0.43204  | 0.0209  | 0.65365 | <i>Pigu</i>               | 2  |
| ENSMUSG00000106206 | 23.4332 | 6.59165 | 2.23608 | 1.04859 | 0       | 2.6922  | 10.7536 | 1.24693 | 3.08747  | 0.02096 | 0.65392 | <i>Gm43094</i>            | 5  |
| ENSMUSG00000097615 | 9.16951 | 6.59165 | 16.7706 | 67.11   | 29.1148 | 8.97399 | 10.8439 | 35.0663 | -1.69722 | 0.02097 | 0.65392 | <i>Gm2061</i>             | 1  |
| ENSMUSG00000041552 | 5.09417 | 7.53331 | 1.11804 | 0       | 0       | 0       | 4.58184 | 0       | 4.68847  | 0.02098 | 1       | <i>Ptchd1</i>             | X  |
| ENSMUSG00000074832 | 0       | 0       | 0       | 0       | 1.94099 | 16.1532 | 0       | 6.03139 | -5.00787 | 0.02098 | 1       | <i>2410141K0<br/>9Rik</i> | 13 |
| ENSMUSG00000114553 | 4.07534 | 0.94166 | 2.23608 | 2.09719 | 22.3214 | 17.0506 | 2.41769 | 13.823  | -2.52756 | 0.02103 | 0.65495 | <i>Gm7644</i>             | 14 |
| ENSMUSG00000105561 | 12.226  | 13.1833 | 6.70823 | 1.04859 | 0.97049 | 3.5896  | 10.7058 | 1.86956 | 2.49696  | 0.02109 | 0.65499 | <i>Gm43462</i>            | 3  |
| ENSMUSG00000030867 | 461.532 | 551.815 | 414.792 | 1102.07 | 648.29  | 517.799 | 476.046 | 756.054 | -0.66634 | 0.0211  | 0.65499 | <i>Plk1</i>               | 7  |
| ENSMUSG00000009487 | 5.09417 | 0.94166 | 6.70823 | 5.24297 | 23.2919 | 26.0246 | 4.24802 | 18.1865 | -2.1217  | 0.02116 | 0.65581 | <i>Otog</i>               | 7  |
| ENSMUSG00000020932 | 57.0547 | 105.466 | 157.643 | 452.992 | 169.836 | 89.7399 | 106.721 | 237.523 | -1.15407 | 0.02125 | 0.65733 | <i>Gfap</i>               | 11 |
| ENSMUSG00000098975 | 3.0565  | 3.76665 | 1.11804 | 11.5345 | 14.5574 | 10.7688 | 2.64706 | 12.2869 | -2.19464 | 0.02128 | 0.65733 | <i>Gm27177</i>            | 14 |
| ENSMUSG00000026229 | 3241.93 | 2081.08 | 3600.08 | 2025.88 | 1972.04 | 2170.81 | 2974.36 | 2056.24 | 0.53235  | 0.0213  | 0.65733 | <i>Psmc1</i>              | 1  |
| ENSMUSG00000047369 | 60.1112 | 27.3082 | 62.6101 | 78.6445 | 74.728  | 139.097 | 50.0099 | 97.4898 | -0.96927 | 0.02133 | 0.65733 | <i>Dnah14</i>             | 1  |
| ENSMUSG00000103108 | 0       | 0       | 0       | 0       | 6.79346 | 9.87139 | 0       | 5.55495 | -4.88768 | 0.0214  | 1       | <i>Rncr4</i>              | 6  |
| ENSMUSG00000036185 | 110.034 | 57.4415 | 112.922 | 28.312  | 43.6722 | 69.0998 | 93.4658 | 47.028  | 0.984    | 0.02142 | 0.6591  | <i>Sapcd1</i>             | 17 |
| ENSMUSG00000031595 | 169.126 | 202.458 | 139.755 | 315.627 | 214.479 | 253.067 | 170.446 | 261.057 | -0.61263 | 0.02145 | 0.6591  | <i>Pdgfrl</i>             | 8  |
| ENSMUSG00000026205 | 6.113   | 5.64998 | 2.23608 | 18.8747 | 14.5574 | 16.1532 | 4.66635 | 16.5284 | -1.81069 | 0.02153 | 0.6605  | <i>Slc23a3</i>            | 1  |
| ENSMUSG00000005672 | 727.447 | 627.148 | 906.729 | 1046.5  | 1056.87 | 1032.01 | 753.775 | 1045.12 | -0.47214 | 0.02166 | 0.66333 | <i>Kit</i>                | 5  |

|                    |         |         |         |         |         |         |         |         |          |         |         |                                 |    |
|--------------------|---------|---------|---------|---------|---------|---------|---------|---------|----------|---------|---------|---------------------------------|----|
| ENSMUSG00000043122 | 16.3013 | 24.4833 | 13.4165 | 41.9437 | 42.7017 | 34.1012 | 18.067  | 39.5822 | -1.12291 | 0.02172 | 0.66333 | <i>A530016L2</i><br><i>4Rik</i> | 12 |
| ENSMUSG00000087013 | 41.7722 | 39.5499 | 40.2494 | 105.908 | 65.0231 | 55.6388 | 40.5238 | 75.5233 | -0.89516 | 0.02174 | 0.66333 | <i>2610027K0</i><br><i>6Rik</i> | 11 |
| ENSMUSG00000028309 | 4755.92 | 2407.83 | 3740.96 | 2171.64 | 2369.95 | 2728.99 | 3634.9  | 2423.52 | 0.58465  | 0.02175 | 0.66333 | <i>Rnf20</i>                    | 4  |
| ENSMUSG00000036825 | 606.206 | 632.798 | 961.513 | 2003.86 | 1138.39 | 669.46  | 733.506 | 1270.57 | -0.79256 | 0.0218  | 0.66397 | <i>Ssx2ip</i>                   | 3  |
| ENSMUSG00000024965 | 307.688 | 252.366 | 226.962 | 700.46  | 670.611 | 157.942 | 262.338 | 509.671 | -0.95738 | 0.02189 | 0.66499 | <i>Fermt3</i>                   | 19 |
| ENSMUSG00000042535 | 909.819 | 1052.78 | 787.099 | 1462.79 | 1460.59 | 1010.47 | 916.566 | 1311.28 | -0.51605 | 0.0219  | 0.66499 | <i>Gtpbp1</i>                   | 15 |
| ENSMUSG00000102813 | 24.452  | 28.2499 | 29.069  | 59.7698 | 46.5837 | 50.2544 | 27.257  | 52.2026 | -0.93682 | 0.02206 | 0.66878 | <i>Gm37795</i>                  | 4  |
| ENSMUSG00000079509 | 2731.49 | 1507.6  | 2842.05 | 1464.88 | 1507.18 | 1748.13 | 2360.38 | 1573.4  | 0.58484  | 0.02212 | 0.66972 | <i>Zfx</i>                      | X  |
| ENSMUSG00000091698 | 1.01883 | 0       | 2.23608 | 7.34015 | 1.94099 | 19.7428 | 1.08497 | 9.67464 | -3.20676 | 0.02229 | 0.67311 | <i>Gm6526</i>                   | 14 |
| ENSMUSG00000026614 | 109.015 | 140.308 | 235.906 | 1012.94 | 521.155 | 147.174 | 161.743 | 560.423 | -1.79296 | 0.0223  | 0.67311 | <i>Slc30a10</i>                 | 1  |
| ENSMUSG00000107770 | 44.8287 | 48.9665 | 45.8396 | 17.8261 | 31.0558 | 19.7428 | 46.5449 | 22.8749 | 1.02438  | 0.02238 | 0.67456 | <i>Gm44126</i>                  | 6  |
| ENSMUSG00000015697 | 7190.93 | 3526.53 | 4767.31 | 2655.04 | 3280.27 | 4084.96 | 5161.59 | 3340.09 | 0.62781  | 0.02251 | 0.6774  | <i>Setdb1</i>                   | 3  |
| ENSMUSG00000025728 | 1488.52 | 1649.79 | 2373.59 | 4680.92 | 2867.81 | 1686.21 | 1837.3  | 3078.31 | -0.74453 | 0.02254 | 0.6774  | <i>Pigq</i>                     | 17 |
| ENSMUSG00000040124 | 624.545 | 384.199 | 676.413 | 334.501 | 333.85  | 438.828 | 561.719 | 369.06  | 0.60469  | 0.02257 | 0.6774  | <i>Gorab</i>                    | 1  |
| ENSMUSG00000026425 | 3382.53 | 1840.95 | 2939.32 | 1684.04 | 1855.58 | 2013.76 | 2720.93 | 1851.13 | 0.55548  | 0.02262 | 0.67742 | <i>Srgap2</i>                   | 1  |
| ENSMUSG00000047260 | 1074.87 | 870.097 | 1184    | 691.023 | 744.369 | 829.197 | 1042.99 | 754.863 | 0.46574  | 0.02272 | 0.67742 | <i>Emc6</i>                     | 11 |
| ENSMUSG00000001416 | 7854.19 | 5658.46 | 7167.74 | 4344.32 | 4896.14 | 5724.51 | 6893.46 | 4988.32 | 0.46657  | 0.02273 | 0.67742 | <i>Cct3</i>                     | 3  |
| ENSMUSG00000086184 | 16.3013 | 9.41664 | 7.82627 | 1.04859 | 2.91148 | 2.6922  | 11.1814 | 2.21742 | 2.32242  | 0.02277 | 0.67742 | <i>Gm12764</i>                  | 7  |



|                    |         |         |         |         |         |         |         |         |          |         |         |                           |    |
|--------------------|---------|---------|---------|---------|---------|---------|---------|---------|----------|---------|---------|---------------------------|----|
| ENSMUSG00000074646 | 70.2995 | 60.2665 | 58.138  | 96.4706 | 101.902 | 106.791 | 62.9013 | 101.721 | -0.69358 | 0.02278 | 0.67742 | <i>6430550D2<br/>3Rik</i> | 2  |
| ENSMUSG00000066009 | 25.4708 | 7.53331 | 25.7149 | 2.09719 | 9.70494 | 3.5896  | 19.573  | 5.13057 | 1.92371  | 0.02282 | 0.67742 | <i>Zfp987</i>             | 4  |
| ENSMUSG00000030683 | 163.013 | 121.475 | 122.984 | 74.4501 | 70.846  | 104.996 | 135.824 | 83.4306 | 0.7009   | 0.02282 | 0.67742 | <i>Sez6l2</i>             | 7  |
| ENSMUSG00000025584 | 1203.24 | 696.831 | 1302.51 | 658.517 | 626.939 | 826.505 | 1067.53 | 703.987 | 0.59997  | 0.02287 | 0.67742 | <i>Pde8a</i>              | 7  |
| ENSMUSG00000004880 | 1063.66 | 892.697 | 1416.55 | 3095.45 | 1885.67 | 916.245 | 1124.3  | 1965.79 | -0.80604 | 0.02289 | 0.67742 | <i>Lbr</i>                | 1  |
| ENSMUSG00000022236 | 41.7722 | 27.3082 | 38.0133 | 54.5268 | 65.9936 | 76.279  | 35.6979 | 65.5998 | -0.88257 | 0.0229  | 0.67742 | <i>Ropn1l</i>             | 15 |
| ENSMUSG00000034906 | 688.732 | 615.848 | 736.787 | 1435.52 | 949.143 | 716.125 | 680.456 | 1033.6  | -0.60283 | 0.02298 | 0.67872 | <i>Ncaph</i>              | 2  |
| ENSMUSG00000087294 | 23.4332 | 4.70832 | 5.59019 | 0       | 0.97049 | 3.5896  | 11.2439 | 1.52003 | 2.84837  | 0.02303 | 0.67872 | <i>Gm13556</i>            | 2  |
| ENSMUSG00000103966 | 14.2637 | 29.1916 | 26.8329 | 11.5345 | 4.85247 | 8.07659 | 23.4294 | 8.15453 | 1.52826  | 0.02307 | 0.67872 | <i>Gm37120</i>            | 1  |
| ENSMUSG00000061232 | 5318.31 | 2353.22 | 4561.6  | 1342.2  | 2293.28 | 3454.99 | 4077.71 | 2363.49 | 0.78662  | 0.02307 | 0.67872 | <i>H2-K1</i>              | 17 |
| ENSMUSG00000085881 | 7.13184 | 15.0666 | 22.3608 | 2.09719 | 1.94099 | 6.2818  | 14.8531 | 3.43999 | 2.08956  | 0.0232  | 0.67965 | <i>Gm15912</i>            | 13 |
| ENSMUSG00000026429 | 699.939 | 366.307 | 832.938 | 410     | 324.145 | 448.7   | 633.061 | 394.282 | 0.68224  | 0.02322 | 0.67965 | <i>Ube2t</i>              | 1  |
| ENSMUSG00000029695 | 42.791  | 92.283  | 59.256  | 109.054 | 95.1084 | 141.789 | 64.7767 | 115.317 | -0.82993 | 0.02323 | 0.67965 | <i>Aass</i>               | 6  |
| ENSMUSG00000033948 | 342.328 | 175.149 | 422.618 | 118.491 | 157.22  | 253.067 | 313.365 | 176.259 | 0.82742  | 0.02324 | 0.67965 | <i>Zswim5</i>             | 4  |
| ENSMUSG00000022054 | 21.3955 | 27.3082 | 24.5968 | 54.5268 | 41.7312 | 47.5622 | 24.4335 | 47.9401 | -0.97025 | 0.02328 | 0.68003 | <i>Nefm</i>               | 14 |
| ENSMUSG00000021385 | 610.282 | 304.157 | 581.38  | 235.933 | 316.381 | 376.908 | 498.606 | 309.741 | 0.68535  | 0.02341 | 0.68283 | <i>Ippk</i>               | 13 |
| ENSMUSG00000024293 | 1098.3  | 703.423 | 1444.51 | 678.44  | 629.85  | 813.941 | 1082.08 | 707.411 | 0.61249  | 0.02346 | 0.68319 | <i>Esco1</i>              | 18 |
| ENSMUSG00000035984 | 45.8475 | 53.6748 | 31.3051 | 50.3325 | 79.5805 | 125.636 | 43.6091 | 85.183  | -0.96528 | 0.02352 | 0.68405 | <i>Nme5</i>               | 18 |

|                    |         |         |         |         |         |         |         |         |          |         |         |                           |    |
|--------------------|---------|---------|---------|---------|---------|---------|---------|---------|----------|---------|---------|---------------------------|----|
| ENSMUSG00000021981 | 1349.95 | 790.997 | 1688.24 | 847.263 | 759.897 | 894.707 | 1276.4  | 833.956 | 0.61355  | 0.02355 | 0.68405 | <i>Cab39l</i>             | 14 |
| ENSMUSG00000066224 | 15.2825 | 3.76665 | 15.6525 | 0       | 1.94099 | 3.5896  | 11.5672 | 1.84353 | 2.61298  | 0.02359 | 0.68405 | <i>Arid3c</i>             | 4  |
| ENSMUSG00000076441 | 53.9982 | 87.5747 | 93.9152 | 102.762 | 175.659 | 124.739 | 78.496  | 134.387 | -0.77698 | 0.02362 | 0.68405 | <i>Ass1</i>               | 2  |
| ENSMUSG00000040310 | 20.3767 | 29.1916 | 15.6525 | 58.7212 | 29.1148 | 53.844  | 21.7403 | 47.2267 | -1.11234 | 0.02369 | 0.68483 | <i>Alx4</i>               | 2  |
| ENSMUSG00000038718 | 3439.58 | 2217.62 | 3320.57 | 2074.12 | 1928.37 | 2345.8  | 2992.59 | 2116.1  | 0.49979  | 0.02371 | 0.68483 | <i>Pbx3</i>               | 2  |
| ENSMUSG00000097138 | 0       | 0       | 0       | 2.09719 | 3.88198 | 7.1792  | 0       | 4.38612 | -4.5466  | 0.02375 | 1       | <i>Gm26625</i>            | 6  |
| ENSMUSG00000048916 | 13.2448 | 15.0666 | 7.82627 | 17.8261 | 55.3181 | 24.2298 | 12.0459 | 32.458  | -1.42415 | 0.02376 | 0.68487 | <i>Gm5540</i>             | 3  |
| ENSMUSG00000045896 | 2869.04 | 1873.91 | 2851    | 1509.97 | 1683.81 | 2081.07 | 2531.31 | 1758.28 | 0.52539  | 0.02379 | 0.68487 | <i>Paip2b</i>             | 6  |
| ENSMUSG00000107856 | 0       | 0       | 0       | 2.09719 | 0       | 15.2558 | 0       | 5.78433 | -4.94662 | 0.02381 | 1       | <i>Gm7838</i>             | 6  |
| ENSMUSG00000048442 | 42.791  | 64.9748 | 72.6725 | 219.156 | 154.309 | 34.1012 | 60.1461 | 135.855 | -1.17418 | 0.02382 | 0.68487 | <i>Smim5</i>              | 11 |
| ENSMUSG00000044285 | 184.409 | 201.516 | 148.699 | 207.621 | 175.659 | 651.512 | 178.208 | 344.931 | -0.95325 | 0.02385 | 0.68487 | <i>Gm1821</i>             | 14 |
| ENSMUSG00000028232 | 605.187 | 457.649 | 633.928 | 393.222 | 400.814 | 418.188 | 565.588 | 404.075 | 0.48427  | 0.02392 | 0.68487 | <i>Tmem68</i>             | 4  |
| ENSMUSG00000066839 | 801.822 | 442.582 | 714.426 | 282.072 | 404.696 | 540.234 | 652.944 | 409.001 | 0.67359  | 0.02398 | 0.68487 | <i>Ecsit</i>              | 9  |
| ENSMUSG00000009863 | 2116.12 | 1711    | 2471.98 | 1459.64 | 1446.04 | 1670.96 | 2099.7  | 1525.55 | 0.46051  | 0.02398 | 0.68487 | <i>Sdhb</i>               | 4  |
| ENSMUSG00000046958 | 21.3955 | 2.82499 | 3.35411 | 1.04859 | 0       | 1.7948  | 9.19154 | 0.9478  | 3.26276  | 0.02399 | 0.68487 | <i>4930432E1<br/>IRik</i> | 7  |
| ENSMUSG00000029047 | 412.628 | 305.099 | 317.523 | 206.573 | 273.679 | 229.734 | 345.083 | 236.662 | 0.54371  | 0.02402 | 0.68487 | <i>Pex10</i>              | 4  |
| ENSMUSG00000069516 | 267.953 | 480.248 | 316.405 | 944.782 | 433.811 | 432.547 | 354.869 | 603.713 | -0.76533 | 0.02407 | 0.68487 | <i>Lyz2</i>               | 10 |
| ENSMUSG00000091509 | 428.929 | 389.849 | 640.636 | 332.404 | 296.001 | 356.268 | 486.471 | 328.224 | 0.56648  | 0.02407 | 0.68487 | <i>Gm17066</i>            | 14 |

|                    |         |         |         |         |         |         |         |         |          |         |         |                           |    |
|--------------------|---------|---------|---------|---------|---------|---------|---------|---------|----------|---------|---------|---------------------------|----|
| ENSMUSG00000070000 | 261.84  | 259.899 | 298.516 | 545.268 | 500.775 | 254.861 | 273.419 | 433.635 | -0.66483 | 0.02414 | 0.6858  | <i>Fcho1</i>              | 8  |
| ENSMUSG00000032839 | 499.229 | 189.274 | 709.954 | 145.754 | 218.361 | 358.96  | 466.152 | 241.025 | 0.94979  | 0.02425 | 0.68734 | <i>Trpc1</i>              | 9  |
| ENSMUSG00000081998 | 93.7327 | 90.3997 | 79.3807 | 53.4783 | 63.0821 | 35.896  | 87.8377 | 50.8188 | 0.79286  | 0.02429 | 0.68734 | <i>Gm13245</i>            | 4  |
| ENSMUSG00000100175 | 1.01883 | 1.88333 | 0       | 2.09719 | 11.6459 | 12.5636 | 0.96739 | 8.7689  | -3.14174 | 0.02429 | 0.68734 | <i>I700025M2<br/>4Rik</i> | 5  |
| ENSMUSG00000049281 | 26.4897 | 35.7832 | 20.1247 | 41.9437 | 47.5542 | 78.0738 | 27.4659 | 55.8572 | -1.02164 | 0.02437 | 0.68867 | <i>Scn3b</i>              | 9  |
| ENSMUSG00000022519 | 796.728 | 529.215 | 665.233 | 419.437 | 465.837 | 513.312 | 663.725 | 466.196 | 0.50891  | 0.02441 | 0.68881 | <i>Srl</i>                | 16 |
| ENSMUSG00000041528 | 765.144 | 830.547 | 1103.5  | 2038.47 | 1231.56 | 955.73  | 899.732 | 1408.58 | -0.6466  | 0.02445 | 0.68895 | <i>Rnf123</i>             | 9  |
| ENSMUSG00000034799 | 886.386 | 276.849 | 449.451 | 182.455 | 253.299 | 428.06  | 537.562 | 287.938 | 0.89958  | 0.02449 | 0.68899 | <i>Unc13a</i>             | 8  |
| ENSMUSG00000115249 | 89.6574 | 44.2582 | 60.3741 | 24.1176 | 19.4099 | 48.4596 | 64.7632 | 30.6624 | 1.07245  | 0.02456 | 0.69001 | <i>Gm49085</i>            | 15 |
| ENSMUSG00000022385 | 471.72  | 270.257 | 364.48  | 552.609 | 563.857 | 507.928 | 368.819 | 541.465 | -0.5544  | 0.02459 | 0.69001 | <i>Gtse1</i>              | 15 |
| ENSMUSG00000034998 | 389.195 | 339.941 | 431.563 | 570.435 | 527.949 | 498.954 | 386.899 | 532.446 | -0.46121 | 0.02468 | 0.69175 | <i>Foxn2</i>              | 17 |
| ENSMUSG00000032375 | 465.607 | 451.999 | 651.816 | 370.153 | 331.909 | 393.958 | 523.141 | 365.34  | 0.51695  | 0.02475 | 0.69274 | <i>Aph1b</i>              | 9  |
| ENSMUSG00000063851 | 57.0547 | 8.47497 | 39.1313 | 4.19437 | 11.6459 | 17.0506 | 34.887  | 10.9636 | 1.65816  | 0.02482 | 0.69308 | <i>Rnf183</i>             | 4  |
| ENSMUSG00000074934 | 29.5462 | 3.76665 | 20.1247 | 6.29156 | 1.94099 | 4.487   | 17.8125 | 4.23985 | 2.07228  | 0.02483 | 0.69308 | <i>Grem1</i>              | 2  |
| ENSMUSG00000008845 | 0       | 0       | 0       | 4.19437 | 4.85247 | 3.5896  | 0       | 4.21215 | -4.4829  | 0.02483 | 1       | <i>Cd163</i>              | 6  |
| ENSMUSG00000034121 | 252.671 | 258.957 | 191.185 | 359.667 | 357.142 | 297.039 | 234.271 | 337.949 | -0.52679 | 0.02494 | 0.69518 | <i>Mks1</i>               | 11 |
| ENSMUSG00000035031 | 35.6592 | 5.64998 | 12.2984 | 8.38875 | 0       | 0       | 17.8692 | 2.79625 | 2.70894  | 0.025   | 0.69567 | <i>C8a</i>                | 4  |
| ENSMUSG00000093954 | 8.15067 | 27.3082 | 20.1247 | 88.0818 | 31.0558 | 26.0246 | 18.5279 | 48.3874 | -1.37855 | 0.02503 | 0.69567 | <i>Gm16867</i>            | 14 |

|                    |         |         |         |         |         |         |         |         |          |         |         |                 |    |
|--------------------|---------|---------|---------|---------|---------|---------|---------|---------|----------|---------|---------|-----------------|----|
| ENSMUSG00000049493 | 151.806 | 60.2665 | 242.614 | 45.0895 | 71.8165 | 103.201 | 151.562 | 73.369  | 1.042    | 0.02507 | 0.69568 | <i>Pls1</i>     | 9  |
| ENSMUSG00000030450 | 2.03767 | 8.47497 | 5.59019 | 27.2634 | 9.70494 | 19.7428 | 5.36761 | 18.9037 | -1.8074  | 0.0251  | 0.69568 | <i>Oca2</i>     | 7  |
| ENSMUSG00000011349 | 1075.89 | 619.615 | 1170.59 | 276.829 | 438.663 | 889.323 | 955.363 | 534.938 | 0.83566  | 0.02513 | 0.69568 | <i>Dmrtd2</i>   | 7  |
| ENSMUSG00000035757 | 420.778 | 356.891 | 373.425 | 275.78  | 289.207 | 269.22  | 383.698 | 278.069 | 0.46451  | 0.02526 | 0.69718 | <i>Selenoo</i>  | 15 |
| ENSMUSG00000036875 | 424.854 | 286.266 | 363.362 | 572.532 | 713.313 | 372.421 | 358.161 | 552.755 | -0.62602 | 0.02527 | 0.69718 | <i>Dna2</i>     | 10 |
| ENSMUSG00000055069 | 88.6386 | 41.4332 | 120.748 | 25.1662 | 43.6722 | 52.9466 | 83.6066 | 40.595  | 1.03527  | 0.02528 | 0.69718 | <i>Rab39</i>    | 9  |
| ENSMUSG00000097325 | 61.13   | 49.9082 | 73.7905 | 32.5064 | 26.2033 | 40.383  | 61.6096 | 33.0309 | 0.89476  | 0.02534 | 0.69794 | <i>Gm16897</i>  | 1  |
| ENSMUSG00000034164 | 140.599 | 256.133 | 133.047 | 330.307 | 263.004 | 255.759 | 176.593 | 283.023 | -0.67758 | 0.02544 | 0.69957 | <i>Emid1</i>    | 11 |
| ENSMUSG00000046213 | 13.2448 | 6.59165 | 22.3608 | 4.19437 | 0.97049 | 4.487   | 14.0657 | 3.21729 | 2.12057  | 0.02557 | 0.70044 | <i>Cym</i>      | 3  |
| ENSMUSG00000058589 | 9.16951 | 11.3    | 17.8886 | 4.19437 | 36.8788 | 87.9451 | 12.786  | 43.0061 | -1.75771 | 0.02561 | 0.70044 | <i>Anks1b</i>   | 10 |
| ENSMUSG00000033282 | 1309.2  | 731.673 | 1361.77 | 613.427 | 736.605 | 888.425 | 1134.21 | 746.152 | 0.60343  | 0.02563 | 0.70044 | <i>Rpgrip11</i> | 8  |
| ENSMUSG00000028879 | 2208.83 | 1880.5  | 2589.38 | 1621.13 | 1586.76 | 1745.44 | 2226.24 | 1651.11 | 0.43088  | 0.02566 | 0.70044 | <i>Stx12</i>    | 4  |
| ENSMUSG00000018909 | 1206.3  | 1440.75 | 1566.37 | 4009.82 | 2407.8  | 1011.37 | 1404.47 | 2476.33 | -0.81802 | 0.02571 | 0.70044 | <i>Arrb1</i>    | 7  |
| ENSMUSG00000048191 | 187.465 | 110.175 | 137.519 | 823.146 | 528.919 | 107.688 | 145.053 | 486.584 | -1.74596 | 0.02572 | 0.70044 | <i>Muc6</i>     | 7  |
| ENSMUSG00000060038 | 481.908 | 523.565 | 475.166 | 351.279 | 397.902 | 338.32  | 493.547 | 362.5   | 0.44561  | 0.02577 | 0.70044 | <i>Dhps</i>     | 8  |
| ENSMUSG00000037419 | 403.458 | 541.457 | 642.872 | 1247.83 | 818.126 | 512.415 | 529.262 | 859.456 | -0.69917 | 0.02577 | 0.70044 | <i>Endod1</i>   | 9  |
| ENSMUSG00000028031 | 11.2072 | 5.64998 | 7.82627 | 25.1662 | 19.4099 | 22.435  | 8.22781 | 22.337  | -1.44355 | 0.02577 | 0.70044 | <i>Dkk2</i>     | 3  |
| ENSMUSG00000029110 | 4320.87 | 2921.04 | 5031.17 | 2935.01 | 2628.1  | 3049.36 | 4091.03 | 2870.82 | 0.51085  | 0.02581 | 0.70054 | <i>Rnf4</i>     | 5  |

|                    |         |         |         |         |         |         |         |         |          |         |         |                           |    |
|--------------------|---------|---------|---------|---------|---------|---------|---------|---------|----------|---------|---------|---------------------------|----|
| ENSMUSG00000025963 | 4.07534 | 0       | 3.35411 | 9.43734 | 9.70494 | 17.948  | 2.47648 | 12.3634 | -2.34627 | 0.0259  | 0.70125 | <i>Mdh1b</i>              | 1  |
| ENSMUSG00000053799 | 208.861 | 186.449 | 191.185 | 467.673 | 356.171 | 166.916 | 195.498 | 330.253 | -0.75523 | 0.02592 | 0.70125 | <i>Exoc6</i>              | 19 |
| ENSMUSG00000040963 | 0       | 1.88333 | 0       | 6.29156 | 5.82296 | 9.87139 | 0.62778 | 7.32864 | -3.47349 | 0.02595 | 0.70125 | <i>Asgr2</i>              | 11 |
| ENSMUSG00000015342 | 234.332 | 250.483 | 579.144 | 1031.82 | 607.529 | 343.704 | 354.653 | 661.016 | -0.89877 | 0.02597 | 0.70125 | <i>Xk</i>                 | X  |
| ENSMUSG00000105572 | 225.162 | 43.3165 | 167.706 | 37.7494 | 91.2264 | 69.9972 | 145.395 | 66.3243 | 1.12967  | 0.02606 | 0.70203 | <i>Gm43300</i>            | 3  |
| ENSMUSG00000081150 | 2.03767 | 3.76665 | 6.70823 | 0       | 0       | 0       | 4.17085 | 0       | 4.54299  | 0.02606 | 1       | <i>Gm12684</i>            | 4  |
| ENSMUSG00000044737 | 17.3202 | 1.88333 | 8.9443  | 1.04859 | 1.94099 | 0.8974  | 9.3826  | 1.29566 | 2.85509  | 0.02611 | 0.70203 | <i>Klk14</i>              | 7  |
| ENSMUSG00000068117 | 641.865 | 264.607 | 602.623 | 141.56  | 217.391 | 446.008 | 503.032 | 268.319 | 0.90497  | 0.02611 | 0.70203 | <i>Mei1</i>               | 15 |
| ENSMUSG00000017664 | 1136    | 933.189 | 1121.39 | 752.89  | 815.215 | 822.018 | 1063.53 | 796.708 | 0.41631  | 0.02614 | 0.70203 | <i>Slc35c2</i>            | 2  |
| ENSMUSG00000056211 | 4571.51 | 2666.79 | 4007.05 | 2444.27 | 2560.16 | 2880.65 | 3748.45 | 2628.36 | 0.51197  | 0.02617 | 0.70203 | <i>R3hdm1</i>             | 1  |
| ENSMUSG00000022021 | 359.648 | 311.691 | 476.284 | 857.749 | 500.775 | 442.418 | 382.541 | 600.314 | -0.65019 | 0.02624 | 0.70303 | <i>Diaph3</i>             | 14 |
| ENSMUSG00000051435 | 4.07534 | 4.70832 | 4.47215 | 8.38875 | 10.6754 | 30.5116 | 4.4186  | 16.5253 | -1.90882 | 0.02629 | 0.70357 | <i>Fhad1</i>              | 4  |
| ENSMUSG00000068151 | 0       | 0       | 0       | 1.04859 | 6.79346 | 5.3844  | 0       | 4.40882 | -4.55316 | 0.02639 | 1       | <i>A230006K0<br/>3Rik</i> | 7  |
| ENSMUSG00000031256 | 3808.4  | 1925.7  | 4250.78 | 1686.14 | 2118.59 | 2575.54 | 3328.29 | 2126.75 | 0.64587  | 0.02648 | 0.70754 | <i>Cstf2</i>              | X  |
| ENSMUSG00000071267 | 827.293 | 572.531 | 1052.07 | 564.143 | 452.25  | 624.59  | 817.3   | 546.994 | 0.57857  | 0.02656 | 0.70774 | <i>Zfp942</i>             | 17 |
| ENSMUSG00000015970 | 17.3202 | 20.7166 | 10.0623 | 41.9437 | 32.9968 | 32.3064 | 16.033  | 35.749  | -1.14694 | 0.02665 | 0.70774 | <i>Chdh</i>               | 14 |
| ENSMUSG00000049036 | 105.959 | 119.591 | 109.568 | 69.2071 | 77.6395 | 67.305  | 111.706 | 71.3839 | 0.64677  | 0.02669 | 0.70774 | <i>Tmem121</i>            | 12 |
| ENSMUSG00000081803 | 0       | 0       | 0       | 6.29156 | 1.94099 | 4.487   | 0       | 4.23985 | -4.49114 | 0.02669 | 1       | <i>Gm15282</i>            | X  |

|                    |         |         |         |         |         |         |         |         |          |         |         |                                 |    |
|--------------------|---------|---------|---------|---------|---------|---------|---------|---------|----------|---------|---------|---------------------------------|----|
| ENSMUSG00000106791 | 16.3013 | 4.70832 | 13.4165 | 3.14578 | 2.91148 | 0.8974  | 11.4754 | 2.31822 | 2.31937  | 0.02669 | 0.70774 | <i>4930553P1</i><br><i>8Rik</i> | 6  |
| ENSMUSG00000003198 | 244.52  | 183.624 | 260.503 | 160.435 | 140.722 | 164.224 | 229.549 | 155.127 | 0.56392  | 0.0267  | 0.70774 | <i>Zfp959</i>                   | 17 |
| ENSMUSG00000091387 | 86.6009 | 37.6665 | 86.0889 | 22.0205 | 32.9968 | 47.5622 | 70.1188 | 34.1931 | 1.02852  | 0.02671 | 0.70774 | <i>Gcnt4</i>                    | 13 |
| ENSMUSG00000019359 | 497.191 | 489.665 | 442.743 | 348.133 | 363.935 | 346.396 | 476.533 | 352.821 | 0.43399  | 0.02672 | 0.70774 | <i>Gdpd2</i>                    | X  |
| ENSMUSG00000102308 | 22.4143 | 0.94166 | 2.23608 | 1.04859 | 0.97049 | 0       | 8.5307  | 0.67303 | 3.69651  | 0.02679 | 0.7079  | <i>2310046K2</i><br><i>3Rik</i> | 3  |
| ENSMUSG00000111353 | 44.8287 | 18.8333 | 45.8396 | 10.4859 | 18.4394 | 17.0506 | 36.5005 | 15.3253 | 1.24388  | 0.0268  | 0.7079  | <i>Gm19324</i>                  | 9  |
| ENSMUSG00000037012 | 831.368 | 977.447 | 575.79  | 1754.3  | 1350.93 | 740.355 | 794.868 | 1281.86 | -0.68874 | 0.02687 | 0.70831 | <i>Hkl1</i>                     | 10 |
| ENSMUSG00000037416 | 2861.9  | 1224.16 | 3312.75 | 1506.83 | 1439.24 | 1653.01 | 2466.27 | 1533.03 | 0.68571  | 0.0269  | 0.70831 | <i>Dmxl1</i>                    | 18 |
| ENSMUSG00000115026 | 28.5274 | 30.1332 | 36.8953 | 11.5345 | 19.4099 | 10.7688 | 31.8519 | 13.9044 | 1.19487  | 0.02691 | 0.70831 | <i>Gm49041</i>                  | 6  |
| ENSMUSG00000039414 | 2148.72 | 1071.61 | 1653.58 | 817.903 | 1018.05 | 1329.95 | 1624.64 | 1055.3  | 0.62203  | 0.02696 | 0.70859 | <i>Heatr5b</i>                  | 17 |
| ENSMUSG00000088327 | 0       | 0.94166 | 0       | 5.24297 | 7.76395 | 3.5896  | 0.31389 | 5.53217 | -3.91359 | 0.02699 | 1       | <i>Gm25666</i>                  | 5  |
| ENSMUSG00000028730 | 42.791  | 29.1916 | 19.0066 | 50.3325 | 77.6395 | 52.0492 | 30.3297 | 60.007  | -0.98106 | 0.02705 | 0.71019 | <i>Cfap57</i>                   | 4  |
| ENSMUSG00000038860 | 1326.52 | 874.806 | 1243.26 | 631.253 | 658.965 | 1024.83 | 1148.2  | 771.683 | 0.57257  | 0.02716 | 0.71025 | <i>Garnl3</i>                   | 2  |
| ENSMUSG00000037544 | 488.021 | 478.365 | 614.921 | 1145.06 | 728.841 | 552.798 | 527.103 | 808.901 | -0.61767 | 0.02719 | 0.71025 | <i>Dlgap5</i>                   | 14 |
| ENSMUSG00000074805 | 103.921 | 29.1916 | 73.7905 | 10.4859 | 24.2623 | 49.357  | 68.9677 | 28.0351 | 1.2902   | 0.02719 | 0.71025 | <i>Illbos</i>                   | 2  |
| ENSMUSG00000030763 | 1075.89 | 775.931 | 1120.27 | 722.481 | 643.437 | 768.174 | 990.698 | 711.364 | 0.47733  | 0.02722 | 0.71025 | <i>Lcmt1</i>                    | 7  |
| ENSMUSG00000042406 | 1537.42 | 2321.2  | 1682.65 | 3821.07 | 2483.49 | 2045.17 | 1847.09 | 2783.25 | -0.59121 | 0.02723 | 0.71025 | <i>Atf4</i>                     | 15 |
| ENSMUSG00000079235 | 8.15067 | 15.0666 | 15.6525 | 15.7289 | 32.9968 | 50.2544 | 12.9566 | 32.9934 | -1.35406 | 0.02732 | 0.71175 | <i>Ccdc13</i>                   | 9  |

|                    |         |         |         |         |         |         |         |         |          |         |         |                           |    |
|--------------------|---------|---------|---------|---------|---------|---------|---------|---------|----------|---------|---------|---------------------------|----|
| ENSMUSG00000029119 | 448.287 | 607.373 | 354.418 | 728.772 | 690.992 | 623.693 | 470.026 | 681.152 | -0.53391 | 0.02739 | 0.71175 | <i>Man2b2</i>             | 5  |
| ENSMUSG00000037369 | 3814.51 | 2012.34 | 4228.42 | 2176.88 | 2239.9  | 2287.47 | 3351.76 | 2234.75 | 0.58463  | 0.02742 | 0.71175 | <i>Kdm6a</i>              | X  |
| ENSMUSG00000113047 | 116.147 | 65.9165 | 91.6791 | 91.2276 | 205.745 | 181.275 | 91.2475 | 159.416 | -0.8075  | 0.02746 | 0.71175 | <i>Gm47469</i>            | 13 |
| ENSMUSG00000064193 | 69.2807 | 88.5164 | 48.0756 | 80.7417 | 109.666 | 731.381 | 68.6242 | 307.263 | -2.16252 | 0.02751 | 0.71175 | <i>Gm4735</i>             | 2  |
| ENSMUSG00000097583 | 81.5067 | 18.8333 | 46.9576 | 10.4859 | 15.5279 | 31.409  | 49.0992 | 19.1409 | 1.35017  | 0.02752 | 0.71175 | <i>6430590A0<br/>7Rik</i> | 3  |
| ENSMUSG00000027333 | 377.987 | 640.331 | 716.662 | 1622.17 | 800.657 | 574.336 | 578.327 | 999.056 | -0.7884  | 0.02757 | 0.71175 | <i>Smox</i>               | 2  |
| ENSMUSG00000002658 | 1331.62 | 1330.57 | 695.42  | 1321.23 | 1816.76 | 2001.2  | 1119.2  | 1713.06 | -0.61386 | 0.02758 | 0.71175 | <i>Gtf2f1</i>             | 17 |
| ENSMUSG00000106422 | 1.01883 | 0.94166 | 0       | 2.09719 | 12.6164 | 7.1792  | 0.6535  | 7.2976  | -3.4471  | 0.02759 | 0.71175 | <i>Gm42812</i>            | 3  |
| ENSMUSG00000078864 | 8.15067 | 13.1833 | 10.0623 | 31.4578 | 27.1738 | 19.7428 | 10.4654 | 26.1248 | -1.31314 | 0.02771 | 0.7138  | <i>Gm14322</i>            | 2  |
| ENSMUSG00000108841 | 12.226  | 4.70832 | 3.35411 | 6.29156 | 21.3509 | 44.87   | 6.76281 | 24.1708 | -1.83973 | 0.02774 | 0.71382 | <i>Frmpd2</i>             | 14 |
| ENSMUSG00000053580 | 2106.95 | 1012.29 | 2202.54 | 832.583 | 1176.24 | 1351.48 | 1773.92 | 1120.1  | 0.66285  | 0.02784 | 0.71455 | <i>Tanc2</i>              | 11 |
| ENSMUSG00000032218 | 806.916 | 807.006 | 1194.06 | 1927.31 | 1358.69 | 990.729 | 935.996 | 1425.58 | -0.60702 | 0.02784 | 0.71455 | <i>Ccnb2</i>              | 9  |
| ENSMUSG00000000346 | 5869.5  | 3371.16 | 4820.98 | 3421.56 | 3052.2  | 3449.6  | 4687.21 | 3307.79 | 0.50279  | 0.02796 | 0.71599 | <i>Dazap2</i>             | 15 |
| ENSMUSG00000081044 | 52.9794 | 30.1332 | 128.574 | 10.4859 | 21.3509 | 50.2544 | 70.5623 | 27.3637 | 1.35668  | 0.02797 | 0.71599 | <i>AU015836</i>           | X  |
| ENSMUSG00000113505 | 3.0565  | 1.88333 | 12.2984 | 0       | 0.97049 | 0       | 5.74608 | 0.3235  | 4.03798  | 0.02798 | 1       | <i>Gm48593</i>            | 13 |
| ENSMUSG00000116777 | 40.7534 | 9.41664 | 16.7706 | 5.24297 | 10.6754 | 4.487   | 22.3135 | 6.8018  | 1.71394  | 0.02806 | 0.71748 | <i>AC078895.<br/>2</i>    | 16 |
| ENSMUSG00000023943 | 3.0565  | 0       | 0       | 2.09719 | 7.76395 | 18.8454 | 1.01883 | 9.56884 | -3.23395 | 0.02813 | 0.71781 | <i>Sult1c1</i>            | 17 |
| ENSMUSG00000031766 | 16.3013 | 4.70832 | 14.5345 | 2.09719 | 1.94099 | 3.5896  | 11.8481 | 2.54259 | 2.20591  | 0.02817 | 0.71781 | <i>Slc12a3</i>            | 8  |

|                    |         |         |         |         |         |         |         |         |          |         |         |                 |    |
|--------------------|---------|---------|---------|---------|---------|---------|---------|---------|----------|---------|---------|-----------------|----|
| ENSMUSG00000114438 | 8.15067 | 9.41664 | 14.5345 | 23.069  | 41.7312 | 17.948  | 10.7006 | 27.5828 | -1.37156 | 0.02819 | 0.71781 | <i>Gm47827</i>  | 13 |
| ENSMUSG00000085196 | 4.07534 | 0       | 7.82627 | 16.7775 | 8.73444 | 25.1272 | 3.9672  | 16.8797 | -2.11882 | 0.02821 | 0.71781 | <i>Gm14963</i>  | 19 |
| ENSMUSG00000093806 | 4.07534 | 0.94166 | 7.82627 | 0       | 0       | 0       | 4.28109 | 0       | 4.57716  | 0.02824 | 1       | <i>Asmt</i>     | X  |
| ENSMUSG00000107634 | 16.3013 | 11.3    | 19.0066 | 8.38875 | 0       | 0       | 15.536  | 2.79625 | 2.50968  | 0.02826 | 0.71821 | <i>Gm36816</i>  | 6  |
| ENSMUSG00000000706 | 28.5274 | 48.9665 | 76.0266 | 247.468 | 102.872 | 27.8194 | 51.1735 | 126.053 | -1.30038 | 0.0284  | 0.72086 | <i>Btm1a1</i>   | 13 |
| ENSMUSG00000035299 | 82.5255 | 45.1999 | 54.7839 | 98.5678 | 108.695 | 98.7139 | 60.8364 | 101.992 | -0.74642 | 0.02847 | 0.72168 | <i>Mid1</i>     | X  |
| ENSMUSG00000042333 | 90.6762 | 102.641 | 160.997 | 663.759 | 455.162 | 83.4581 | 118.105 | 400.793 | -1.76291 | 0.02856 | 0.72168 | <i>Tnfrsf14</i> | 4  |
| ENSMUSG00000114357 | 0       | 0       | 0       | 3.14578 | 7.76395 | 1.7948  | 0       | 4.23484 | -4.49006 | 0.02858 | 1       | <i>Gm48449</i>  | 14 |
| ENSMUSG00000030269 | 1019.85 | 813.597 | 951.45  | 662.711 | 652.172 | 756.508 | 928.3   | 690.463 | 0.42654  | 0.02859 | 0.72168 | <i>Mtmr14</i>   | 6  |
| ENSMUSG00000036352 | 1487.5  | 1712.89 | 2084.02 | 4573.96 | 2523.28 | 1570.45 | 1761.47 | 2889.23 | -0.71381 | 0.0287  | 0.72168 | <i>Ubac1</i>    | 2  |
| ENSMUSG00000030879 | 1213.43 | 1274.07 | 1589.85 | 983.58  | 923.91  | 1108.29 | 1359.12 | 1005.26 | 0.43468  | 0.02871 | 0.72168 | <i>Mrpl17</i>   | 7  |
| ENSMUSG00000027806 | 2533.84 | 1439.8  | 2711.24 | 1345.35 | 1379.07 | 1775.95 | 2228.3  | 1500.12 | 0.5705   | 0.02874 | 0.72168 | <i>Tsc22d2</i>  | 3  |
| ENSMUSG00000040929 | 914.913 | 422.807 | 1007.35 | 361.765 | 535.713 | 551.003 | 781.691 | 482.827 | 0.69414  | 0.02875 | 0.72168 | <i>Rfx3</i>     | 19 |
| ENSMUSG00000022157 | 0       | 1.88333 | 30.187  | 2.09719 | 0       | 0       | 10.6901 | 0.69906 | 3.982    | 0.02879 | 0.72168 | <i>Mcpt8</i>    | 14 |
| ENSMUSG00000026991 | 673.449 | 667.64  | 673.059 | 811.611 | 880.238 | 967.397 | 671.383 | 886.415 | -0.40117 | 0.02881 | 0.72168 | <i>Pkp4</i>     | 2  |
| ENSMUSG00000059187 | 18.339  | 4.70832 | 32.4231 | 0       | 0       | 8.97399 | 18.4901 | 2.99133 | 2.59329  | 0.02883 | 0.72168 | <i>Fam19a1</i>  | 6  |
| ENSMUSG00000065968 | 63.1677 | 48.9665 | 41.3674 | 22.0205 | 19.4099 | 35.896  | 51.1672 | 25.7754 | 0.98544  | 0.02885 | 0.72168 | <i>Ifitm7</i>   | 16 |
| ENSMUSG00000040482 | 813.029 | 812.656 | 1007.35 | 624.962 | 656.054 | 682.024 | 877.679 | 654.346 | 0.42305  | 0.02885 | 0.72168 | <i>Dxo</i>      | 17 |



|                    |         |         |         |         |         |         |         |         |          |         |         |                      |    |
|--------------------|---------|---------|---------|---------|---------|---------|---------|---------|----------|---------|---------|----------------------|----|
| ENSMUSG00000037798 | 1.01883 | 0       | 0       | 2.09719 | 4.85247 | 9.87139 | 0.33961 | 5.60702 | -3.94061 | 0.02895 | 1       | <i>Mat1a</i>         | 14 |
| ENSMUSG00000031872 | 47.8852 | 36.7249 | 39.1313 | 71.3043 | 71.8165 | 68.2024 | 41.2471 | 70.4411 | -0.7723  | 0.02921 | 0.7298  | <i>Bean1</i>         | 8  |
| ENSMUSG00000030691 | 2384.07 | 1257.12 | 2514.47 | 1106.27 | 1213.12 | 1689.8  | 2051.89 | 1336.4  | 0.61819  | 0.02926 | 0.73013 | <i>Fchsd2</i>        | 7  |
| ENSMUSG00000101258 | 12.226  | 14.125  | 5.59019 | 36.7008 | 31.0558 | 16.1532 | 10.6471 | 27.9699 | -1.37968 | 0.02935 | 0.73154 | <i>Gm29477</i>       | 11 |
| ENSMUSG00000029686 | 5165.49 | 3852.35 | 5100.49 | 3498.11 | 3448.16 | 3664.08 | 4706.11 | 3536.78 | 0.41199  | 0.02946 | 0.73335 | <i>Cull1</i>         | 6  |
| ENSMUSG00000055044 | 152.825 | 113     | 106.214 | 219.156 | 278.532 | 122.046 | 124.013 | 206.578 | -0.73486 | 0.02957 | 0.73423 | <i>Pdlim1</i>        | 19 |
| ENSMUSG00000022429 | 2225.13 | 895.522 | 1855.94 | 529.54  | 856.946 | 1460.97 | 1658.87 | 949.151 | 0.80497  | 0.02959 | 0.73423 | <i>Dmc1</i>          | 15 |
| ENSMUSG00000021061 | 431.986 | 823.956 | 1683.77 | 6280.02 | 3175.46 | 969.191 | 979.902 | 3474.89 | -1.82631 | 0.0296  | 0.73423 | <i>Sptb</i>          | 12 |
| ENSMUSG00000030677 | 946.497 | 888.93  | 912.319 | 1564.5  | 1178.18 | 1041.88 | 915.915 | 1261.52 | -0.46154 | 0.02971 | 0.73601 | <i>Kif22</i>         | 7  |
| ENSMUSG00000074274 | 1.01883 | 0       | 0       | 12.5831 | 7.76395 | 0       | 0.33961 | 6.78236 | -4.20329 | 0.02974 | 1       | <i>D930028M14Rik</i> | 7  |
| ENSMUSG00000110649 | 21.3955 | 25.4249 | 38.0133 | 46.1381 | 64.0526 | 51.1518 | 28.2779 | 53.7808 | -0.93293 | 0.02983 | 0.73818 | <i>Gm40466</i>       | 8  |
| ENSMUSG00000099418 | 25.4708 | 2.82499 | 23.4788 | 8.38875 | 0       | 0.8974  | 17.2582 | 3.09538 | 2.50267  | 0.02991 | 0.73845 | <i>Gm6657</i>        | 12 |
| ENSMUSG00000022404 | 1629.12 | 1233.58 | 1696.06 | 1102.07 | 968.553 | 1250.97 | 1519.59 | 1107.2  | 0.45637  | 0.02998 | 0.73845 | <i>Slc25a17</i>      | 15 |
| ENSMUSG00000070730 | 473.758 | 429.399 | 498.645 | 610.281 | 651.201 | 604.847 | 467.267 | 622.11  | -0.41341 | 0.03007 | 0.73845 | <i>Rmdn3</i>         | 2  |
| ENSMUSG00000028577 | 2825.23 | 1926.64 | 3032.12 | 1544.58 | 1713.89 | 2197.73 | 2594.66 | 1818.73 | 0.51227  | 0.03008 | 0.73845 | <i>Plaa</i>          | 4  |
| ENSMUSG00000039563 | 94.7516 | 39.5499 | 49.1937 | 18.8747 | 42.7017 | 26.0246 | 61.165  | 29.2003 | 1.0646   | 0.03009 | 0.73845 | <i>2210406O10Rik</i> | 5  |
| ENSMUSG00000031844 | 21.3955 | 25.4249 | 13.4165 | 37.7494 | 51.4362 | 35.896  | 20.079  | 41.6938 | -1.04697 | 0.03014 | 0.73845 | <i>Hsd17b2</i>       | 8  |
| ENSMUSG00000017499 | 440.136 | 459.532 | 521.006 | 1080.05 | 962.73  | 346.396 | 473.558 | 796.392 | -0.74959 | 0.03016 | 0.73845 | <i>Cdc6</i>          | 11 |

|                     |         |         |         |         |         |         |         |         |          |         |         |                 |    |
|---------------------|---------|---------|---------|---------|---------|---------|---------|---------|----------|---------|---------|-----------------|----|
| ENSMUSG00000029192  | 2229.21 | 1642.26 | 2624.04 | 1625.32 | 1564.44 | 1505.84 | 2165.17 | 1565.2  | 0.46792  | 0.03018 | 0.73845 | <i>Tbc1d14</i>  | 5  |
| ENSMUSG000000112909 | 5.09417 | 6.59165 | 10.0623 | 1.04859 | 0.97049 | 0.8974  | 7.24939 | 0.97216 | 2.89848  | 0.0302  | 0.73845 | <i>Gm10120</i>  | 10 |
| ENSMUSG00000067338  | 49.9229 | 60.2665 | 175.532 | 35.6522 | 21.3509 | 69.0998 | 95.2404 | 42.0343 | 1.17415  | 0.03026 | 0.73845 | <i>Tuba3b</i>   | 6  |
| ENSMUSG00000028684  | 1454.89 | 2088.61 | 2175.7  | 5269.18 | 2866.84 | 1563.27 | 1906.4  | 3233.1  | -0.76194 | 0.03029 | 0.73845 | <i>Urod</i>     | 4  |
| ENSMUSG00000074582  | 1920.5  | 977.447 | 1986.75 | 1079    | 1065.6  | 1122.65 | 1628.23 | 1089.08 | 0.57987  | 0.0303  | 0.73845 | <i>Arfgef2</i>  | 2  |
| ENSMUSG000000107251 | 0       | 4.70832 | 0       | 11.5345 | 4.85247 | 17.0506 | 1.56944 | 11.1459 | -2.7789  | 0.03036 | 0.73845 | <i>Gm43102</i>  | 5  |
| ENSMUSG00000068740  | 185.428 | 263.666 | 173.296 | 268.44  | 349.378 | 299.731 | 207.463 | 305.85  | -0.55847 | 0.03039 | 0.73845 | <i>Celsr2</i>   | 3  |
| ENSMUSG00000075289  | 272.029 | 210.933 | 195.657 | 102.762 | 157.22  | 178.582 | 226.206 | 146.188 | 0.628    | 0.03039 | 0.73845 | <i>Carns1</i>   | 19 |
| ENSMUSG00000030609  | 465.607 | 286.266 | 301.87  | 318.772 | 878.297 | 1801.98 | 351.248 | 999.682 | -1.50914 | 0.03041 | 0.73845 | <i>Aen</i>      | 7  |
| ENSMUSG00000080824  | 142.637 | 62.1498 | 190.066 | 55.5754 | 60.1706 | 94.2269 | 131.618 | 69.991  | 0.9064   | 0.03048 | 0.73849 | <i>Gm9001</i>   | 6  |
| ENSMUSG00000028633  | 1515.01 | 1226.99 | 1834.7  | 978.337 | 1097.63 | 1232.13 | 1525.56 | 1102.7  | 0.46775  | 0.03048 | 0.73849 | <i>Ctps</i>     | 4  |
| ENSMUSG00000089563  | 10.1883 | 4.70832 | 19.0066 | 3.14578 | 2.91148 | 0.8974  | 11.3011 | 2.31822 | 2.2937   | 0.03059 | 0.73954 | <i>Gm24667</i>  | 16 |
| ENSMUSG00000047495  | 73.356  | 18.8333 | 52.5478 | 6.29156 | 17.4689 | 31.409  | 48.2457 | 18.3898 | 1.38085  | 0.03063 | 0.73954 | <i>Dlgap2</i>   | 8  |
| ENSMUSG00000024672  | 30.565  | 19.7749 | 17.8886 | 72.3529 | 39.7902 | 32.3064 | 22.7429 | 48.1499 | -1.07716 | 0.03063 | 0.73954 | <i>Ms4a7</i>    | 19 |
| ENSMUSG00000026809  | 13.2448 | 27.3082 | 19.0066 | 45.0895 | 43.6722 | 34.9986 | 19.8532 | 41.2534 | -1.04933 | 0.03069 | 0.73996 | <i>Spaca9</i>   | 2  |
| ENSMUSG00000096433  | 231.275 | 179.858 | 301.87  | 142.609 | 145.574 | 181.275 | 237.668 | 156.486 | 0.60022  | 0.03078 | 0.73996 | <i>Zfp994</i>   | 17 |
| ENSMUSG00000003847  | 10131.3 | 7263.05 | 9284.19 | 6961.61 | 6501.34 | 6602.17 | 8892.84 | 6688.37 | 0.41096  | 0.0308  | 0.73996 | <i>Nfat5</i>    | 8  |
| ENSMUSG00000084796  | 20.3767 | 15.0666 | 6.70823 | 60.8184 | 74.728  | 3.5896  | 14.0505 | 46.3787 | -1.71659 | 0.03081 | 0.73996 | <i>Mir142hg</i> | 11 |

|                    |         |         |         |         |         |         |         |         |          |         |         |                           |    |
|--------------------|---------|---------|---------|---------|---------|---------|---------|---------|----------|---------|---------|---------------------------|----|
| ENSMUSG00000078735 | 1.01883 | 1.88333 | 1.11804 | 3.14578 | 17.4689 | 6.2818  | 1.34007 | 8.96549 | -2.73227 | 0.03083 | 0.73996 | <i>Ill1ra2</i>            | 4  |
| ENSMUSG00000028212 | 1490.55 | 673.289 | 1891.72 | 878.721 | 678.375 | 941.372 | 1351.85 | 832.823 | 0.69845  | 0.0309  | 0.74062 | <i>Ccne2</i>              | 4  |
| ENSMUSG00000004071 | 2863.94 | 2925.75 | 2559.19 | 2145.42 | 2135.09 | 2217.47 | 2782.96 | 2165.99 | 0.36167  | 0.03094 | 0.74062 | <i>Cdip1</i>              | 16 |
| ENSMUSG00000044177 | 75.3937 | 102.641 | 54.7839 | 138.414 | 106.754 | 136.405 | 77.6063 | 127.191 | -0.70853 | 0.03096 | 0.74062 | <i>Wfikkn2</i>            | 11 |
| ENSMUSG00000044201 | 118.185 | 140.308 | 133.047 | 262.148 | 165.954 | 170.506 | 130.513 | 199.536 | -0.61071 | 0.03101 | 0.74093 | <i>Cdc25c</i>             | 18 |
| ENSMUSG00000039253 | 315.839 | 553.698 | 447.215 | 1160.79 | 726.9   | 367.036 | 438.917 | 751.576 | -0.77521 | 0.03125 | 0.74575 | <i>Fn3krp</i>             | 11 |
| ENSMUSG00000036403 | 423.835 | 341.824 | 365.598 | 571.483 | 529.89  | 452.289 | 377.086 | 517.887 | -0.45741 | 0.03136 | 0.7475  | <i>Cep135</i>             | 5  |
| ENSMUSG00000056073 | 33.6215 | 16.0083 | 24.5968 | 46.1381 | 38.8198 | 63.7154 | 24.7422 | 49.5577 | -1.00703 | 0.03145 | 0.74838 | <i>Grik2</i>              | 10 |
| ENSMUSG00000030433 | 13.2448 | 20.7166 | 16.7706 | 38.7979 | 51.4362 | 22.435  | 16.9107 | 37.5564 | -1.14654 | 0.03147 | 0.74838 | <i>Sbk2</i>               | 7  |
| ENSMUSG00000033688 | 158.938 | 80.9831 | 175.532 | 457.187 | 234.86  | 111.278 | 138.484 | 267.775 | -0.95146 | 0.03152 | 0.74879 | <i>1300017J02<br/>Rik</i> | 9  |
| ENSMUSG00000116607 | 0       | 0       | 1.11804 | 2.09719 | 8.73444 | 5.3844  | 0.37268 | 5.40534 | -3.88443 | 0.03162 | 1       | <i>AC134560.<br/>2</i>    | 16 |
| ENSMUSG00000024406 | 27.5085 | 37.6665 | 98.3874 | 17.8261 | 3.88198 | 36.7934 | 54.5208 | 19.5005 | 1.47549  | 0.03163 | 0.74986 | <i>Pou5fl</i>             | 17 |
| ENSMUSG00000029920 | 1948.01 | 1543.39 | 2305.39 | 1423.99 | 1289.79 | 1526.48 | 1932.26 | 1413.42 | 0.45077  | 0.03164 | 0.74986 | <i>Smarcad1</i>           | 6  |
| ENSMUSG00000029822 | 383.082 | 320.166 | 339.884 | 264.245 | 268.827 | 216.273 | 347.71  | 249.782 | 0.47783  | 0.0317  | 0.7504  | <i>Osbp13</i>             | 6  |
| ENSMUSG00000004508 | 1816.58 | 1314.56 | 1823.52 | 1082.15 | 1075.31 | 1415.2  | 1651.55 | 1190.88 | 0.47133  | 0.03173 | 0.7504  | <i>Gab2</i>               | 7  |
| ENSMUSG00000029104 | 4548.07 | 1718.54 | 3391.01 | 1563.45 | 2084.62 | 2405.93 | 3219.21 | 2018    | 0.67359  | 0.03187 | 0.75282 | <i>Htt</i>                | 5  |
| ENSMUSG00000031604 | 852.764 | 762.748 | 912.319 | 731.918 | 578.414 | 549.208 | 842.61  | 619.847 | 0.44323  | 0.03191 | 0.75292 | <i>Msmo1</i>              | 8  |
| ENSMUSG00000004098 | 28.5274 | 32.9582 | 26.8329 | 68.1586 | 42.7017 | 52.9466 | 29.4395 | 54.6023 | -0.88734 | 0.03207 | 0.75568 | <i>Col5a3</i>             | 9  |

|                    |         |         |         |         |         |         |         |         |          |         |         |                |    |
|--------------------|---------|---------|---------|---------|---------|---------|---------|---------|----------|---------|---------|----------------|----|
| ENSMUSG00000037926 | 946.497 | 677.998 | 1271.21 | 626.01  | 712.342 | 656.896 | 965.235 | 665.083 | 0.53668  | 0.03211 | 0.75575 | <i>Ssh2</i>    | 11 |
| ENSMUSG00000033416 | 726.429 | 931.305 | 1008.47 | 1953.53 | 1219.91 | 897.399 | 888.735 | 1356.95 | -0.61027 | 0.03228 | 0.75859 | <i>Gucd1</i>   | 10 |
| ENSMUSG00000062729 | 1342.82 | 1958.66 | 2028.12 | 4462.81 | 2818.31 | 1475.32 | 1776.53 | 2918.82 | -0.71618 | 0.0323  | 0.75859 | <i>Ppox</i>    | 1  |
| ENSMUSG00000020279 | 71.3184 | 26.3666 | 22.3608 | 33.555  | 98.9904 | 139.994 | 40.0152 | 90.8466 | -1.1842  | 0.03252 | 0.76189 | <i>Il9r</i>    | 11 |
| ENSMUSG00000045210 | 2172.15 | 1331.51 | 2455.21 | 1377.85 | 1315.02 | 1458.27 | 1986.29 | 1383.71 | 0.52122  | 0.03253 | 0.76189 | <i>Vcpip1</i>  | 1  |
| ENSMUSG00000029166 | 366.78  | 435.99  | 402.494 | 438.312 | 573.562 | 693.69  | 401.755 | 568.521 | -0.50144 | 0.03255 | 0.76189 | <i>Mapre3</i>  | 5  |
| ENSMUSG00000039745 | 48.904  | 79.0997 | 130.81  | 274.731 | 133.928 | 91.5347 | 86.2714 | 166.731 | -0.95104 | 0.03264 | 0.76279 | <i>Htatip2</i> | 7  |
| ENSMUSG00000053040 | 177.277 | 146.9   | 193.421 | 118.491 | 102.872 | 127.431 | 172.532 | 116.265 | 0.56769  | 0.03266 | 0.76279 | <i>Aph1c</i>   | 9  |
| ENSMUSG00000096906 | 0       | 5.64998 | 13.4165 | 0       | 0.97049 | 0       | 6.35548 | 0.3235  | 4.18767  | 0.0327  | 1       | <i>Gm26506</i> | 7  |
| ENSMUSG00000037443 | 1570.02 | 863.506 | 1734.08 | 734.015 | 901.589 | 1113.67 | 1389.2  | 916.426 | 0.59955  | 0.03274 | 0.76373 | <i>Cep85</i>   | 4  |
| ENSMUSG00000039109 | 61.13   | 58.3831 | 115.158 | 114.297 | 108.695 | 180.377 | 78.2237 | 134.456 | -0.78689 | 0.03279 | 0.76373 | <i>F13a1</i>   | 13 |
| ENSMUSG00000035722 | 319.914 | 352.182 | 409.202 | 926.956 | 675.464 | 257.554 | 360.433 | 619.991 | -0.78207 | 0.03281 | 0.76373 | <i>Abca7</i>   | 10 |
| ENSMUSG00000026602 | 44.8287 | 32.9582 | 17.8886 | 51.3811 | 70.846  | 61.0232 | 31.8918 | 61.0834 | -0.93367 | 0.03293 | 0.76566 | <i>Nphs2</i>   | 1  |
| ENSMUSG00000037379 | 116.147 | 152.55  | 139.755 | 260.051 | 165.954 | 191.146 | 136.15  | 205.717 | -0.59394 | 0.03316 | 0.76847 | <i>Spon2</i>   | 5  |
| ENSMUSG00000027737 | 28.5274 | 44.2582 | 13.4165 | 84.936  | 47.5542 | 48.4596 | 28.734  | 60.3166 | -1.05927 | 0.03319 | 0.76847 | <i>Slc7a11</i> | 3  |
| ENSMUSG00000114547 | 16.3013 | 20.7166 | 22.3608 | 11.5345 | 127.135 | 28.7168 | 19.7929 | 55.7953 | -1.49642 | 0.0332  | 0.76847 | <i>Gm3226</i>  | 13 |
| ENSMUSG00000043953 | 13.2448 | 32.9582 | 51.4298 | 169.872 | 61.1411 | 21.5376 | 32.5443 | 84.1836 | -1.37117 | 0.0332  | 0.76847 | <i>Ccrl2</i>   | 9  |
| ENSMUSG00000001348 | 233.313 | 478.365 | 536.658 | 2398.13 | 1099.57 | 386.779 | 416.112 | 1294.83 | -1.63766 | 0.03328 | 0.76855 | <i>Acp5</i>    | 9  |

|                    |         |         |         |         |         |         |         |         |          |         |         |                 |    |
|--------------------|---------|---------|---------|---------|---------|---------|---------|---------|----------|---------|---------|-----------------|----|
| ENSMUSG00000034645 | 319.914 | 79.0997 | 212.427 | 53.4783 | 97.0494 | 154.353 | 203.814 | 101.627 | 1.00101  | 0.03328 | 0.76855 | <i>Zyg11a</i>   | 4  |
| ENSMUSG00000069274 | 17.3202 | 6.59165 | 1.11804 | 0       | 0.97049 | 1.7948  | 8.34329 | 0.92176 | 3.14522  | 0.03334 | 0.76892 | <i>Hist1h4f</i> | 13 |
| ENSMUSG00000086540 | 13.2448 | 5.64998 | 13.4165 | 5.24297 | 46.5837 | 46.6648 | 10.7704 | 32.8305 | -1.61775 | 0.03337 | 0.76892 | <i>Scml1</i>    | X  |
| ENSMUSG00000103928 | 182.371 | 117.708 | 160.997 | 84.936  | 115.489 | 96.9191 | 153.692 | 99.1147 | 0.63101  | 0.03343 | 0.76954 | <i>Gm37893</i>  | 1  |
| ENSMUSG00000086096 | 0       | 0       | 0       | 1.04859 | 1.94099 | 9.87139 | 0       | 4.28699 | -4.51619 | 0.03347 | 1       | <i>Gm12688</i>  | 4  |
| ENSMUSG00000056531 | 1122.75 | 317.341 | 868.716 | 353.376 | 401.784 | 573.438 | 769.604 | 442.866 | 0.79648  | 0.03349 | 0.76989 | <i>Ccdc18</i>   | 5  |
| ENSMUSG00000059891 | 15.2825 | 17.8916 | 11.1804 | 6.29156 | 59.2001 | 59.2284 | 14.7848 | 41.5733 | -1.49146 | 0.03364 | 0.77053 | <i>Tsks</i>     | 7  |
| ENSMUSG00000074476 | 307.688 | 314.516 | 342.12  | 497.033 | 504.657 | 350.883 | 321.441 | 450.858 | -0.48774 | 0.03369 | 0.77053 | <i>Spc24</i>    | 9  |
| ENSMUSG00000063077 | 3615.84 | 2572.63 | 3511.76 | 2312.15 | 2527.17 | 2405.03 | 3233.41 | 2414.78 | 0.42101  | 0.03373 | 0.77053 | <i>Kif1b</i>    | 4  |
| ENSMUSG00000004085 | 269.991 | 278.732 | 333.175 | 537.928 | 439.634 | 311.398 | 293.966 | 429.653 | -0.54716 | 0.03376 | 0.77053 | <i>Map3k20</i>  | 2  |
| ENSMUSG00000031004 | 7288.74 | 4992.7  | 8548.52 | 17270.3 | 9745.7  | 6507.94 | 6943.32 | 11174.7 | -0.68653 | 0.03383 | 0.77053 | <i>Mki67</i>    | 7  |
| ENSMUSG00000024206 | 360.667 | 294.741 | 374.543 | 574.629 | 451.28  | 415.496 | 343.317 | 480.468 | -0.48496 | 0.03386 | 0.77053 | <i>Rfx2</i>     | 17 |
| ENSMUSG00000033633 | 1.01883 | 0.94166 | 2.23608 | 1.04859 | 8.73444 | 18.8454 | 1.39886 | 9.54281 | -2.79629 | 0.03388 | 0.77053 | <i>Clec18a</i>  | 8  |
| ENSMUSG00000019732 | 307.688 | 140.308 | 138.637 | 74.4501 | 117.43  | 143.584 | 195.544 | 111.821 | 0.80456  | 0.03391 | 0.77053 | <i>Calr3</i>    | 8  |
| ENSMUSG00000036977 | 344.366 | 328.641 | 337.648 | 246.419 | 230.007 | 265.63  | 336.885 | 247.352 | 0.44524  | 0.03392 | 0.77053 | <i>Anapc10</i>  | 8  |
| ENSMUSG00000092581 | 34.6404 | 7.53331 | 11.1804 | 9.43734 | 0       | 0       | 17.7847 | 3.14578 | 2.52999  | 0.034   | 0.77053 | <i>Gm3211</i>   | 9  |
| ENSMUSG00000045662 | 12.226  | 0.94166 | 7.82627 | 4.19437 | 21.3509 | 56.5362 | 6.99798 | 27.3605 | -1.97955 | 0.03402 | 0.77053 | <i>Henmt1</i>   | 3  |
| ENSMUSG00000032387 | 3073.82 | 2056.59 | 2874.48 | 1529.9  | 1879.85 | 2279.39 | 2668.3  | 1896.38 | 0.49236  | 0.03405 | 0.77053 | <i>Rbpms2</i>   | 9  |

|                    |         |         |         |         |         |         |         |         |          |         |         |                           |    |
|--------------------|---------|---------|---------|---------|---------|---------|---------|---------|----------|---------|---------|---------------------------|----|
| ENSMUSG00000026239 | 1178.79 | 958.614 | 1195.18 | 851.458 | 796.775 | 874.067 | 1110.86 | 840.767 | 0.40156  | 0.03405 | 0.77053 | <i>Pde6d</i>              | 1  |
| ENSMUSG00000019726 | 1769.71 | 782.522 | 1366.24 | 616.573 | 855.976 | 1037.39 | 1306.16 | 836.647 | 0.64211  | 0.03406 | 0.77053 | <i>Lyst</i>               | 13 |
| ENSMUSG00000059900 | 18.339  | 30.1332 | 20.1247 | 85.9846 | 74.728  | 11.6662 | 22.8656 | 57.4596 | -1.32371 | 0.03407 | 0.77053 | <i>Tmem40</i>             | 6  |
| ENSMUSG00000104864 | 1.01883 | 0       | 0       | 3.14578 | 11.6459 | 1.7948  | 0.33961 | 5.52883 | -3.91321 | 0.0341  | 1       | <i>Gm43655</i>            | 3  |
| ENSMUSG00000001630 | 918.988 | 730.731 | 1019.65 | 573.58  | 688.08  | 692.792 | 889.79  | 651.484 | 0.44894  | 0.03414 | 0.77112 | <i>Stk38l</i>             | 6  |
| ENSMUSG00000051606 | 20.3767 | 14.125  | 17.8886 | 7.34015 | 36.8788 | 105.893 | 17.4634 | 50.0374 | -1.5239  | 0.03418 | 0.77112 | <i>2010001K2<br/>IRik</i> | 13 |
| ENSMUSG00000020679 | 26.4897 | 7.53331 | 12.2984 | 13.6317 | 66.9641 | 42.1778 | 15.4405 | 40.9245 | -1.41023 | 0.03423 | 0.77112 | <i>Hnf1b</i>              | 11 |
| ENSMUSG00000073411 | 2841.53 | 1688.4  | 2353.47 | 928.005 | 1554.73 | 1999.41 | 2294.47 | 1494.05 | 0.61857  | 0.03433 | 0.77112 | <i>H2-D1</i>              | 17 |
| ENSMUSG00000091900 | 7.13184 | 5.64998 | 21.2427 | 12.5831 | 51.4362 | 31.409  | 11.3415 | 31.8094 | -1.5035  | 0.03434 | 0.77112 | <i>Gm4353</i>             | 7  |
| ENSMUSG00000087714 | 22.4143 | 1.88333 | 7.82627 | 0       | 0.97049 | 3.5896  | 10.708  | 1.52003 | 2.77873  | 0.03442 | 0.77112 | <i>Gm25827</i>            | 4  |
| ENSMUSG00000054169 | 0       | 0       | 0       | 6.29156 | 1.94099 | 3.5896  | 0       | 3.94071 | -4.3845  | 0.03448 | 1       | <i>Ceacam10</i>           | 7  |
| ENSMUSG00000113198 | 3.0565  | 1.88333 | 3.35411 | 2.09719 | 10.6754 | 26.922  | 2.76465 | 13.2315 | -2.27445 | 0.03452 | 0.77112 | <i>Gm6988</i>             | 12 |
| ENSMUSG00000113885 | 2.03767 | 0       | 0       | 1.04859 | 7.76395 | 14.3584 | 0.67922 | 7.72364 | -3.50995 | 0.03452 | 0.77112 | <i>Gm47802</i>            | 13 |
| ENSMUSG00000071072 | 2995.37 | 2375.82 | 3744.31 | 2193.66 | 2068.12 | 2395.16 | 3038.5  | 2218.98 | 0.45323  | 0.03453 | 0.77112 | <i>Ptges3</i>             | 10 |
| ENSMUSG00000027824 | 106.978 | 57.4415 | 91.6791 | 25.1662 | 19.4099 | 76.279  | 85.3661 | 40.285  | 1.07656  | 0.03454 | 0.77112 | <i>Vmn2r1</i>             | 3  |
| ENSMUSG00000064936 | 11.2072 | 2.82499 | 12.2984 | 1.04859 | 0       | 2.6922  | 8.77686 | 1.24693 | 2.786    | 0.03455 | 0.77112 | <i>Gm23722</i>            | 1  |
| ENSMUSG00000021432 | 891.48  | 639.39  | 1035.3  | 523.248 | 575.503 | 703.561 | 855.391 | 600.771 | 0.50879  | 0.03456 | 0.77112 | <i>Slc35b3</i>            | 13 |
| ENSMUSG00000032915 | 25.4708 | 7.53331 | 15.6525 | 3.14578 | 4.85247 | 6.2818  | 16.2189 | 4.76001 | 1.7572   | 0.03458 | 0.77112 | <i>Adgre4</i>             | 17 |

|                    |         |         |         |         |         |         |         |         |          |         |         |                           |    |
|--------------------|---------|---------|---------|---------|---------|---------|---------|---------|----------|---------|---------|---------------------------|----|
| ENSMUSG00000081296 | 19.3578 | 8.47497 | 23.4788 | 1.04859 | 3.88198 | 8.97399 | 17.1039 | 4.63485 | 1.85852  | 0.03463 | 0.77147 | <i>Gm12203</i>            | 11 |
| ENSMUSG00000041245 | 729.485 | 317.341 | 816.168 | 278.926 | 275.62  | 540.234 | 620.998 | 364.927 | 0.76567  | 0.03471 | 0.77232 | <i>Wnk3</i>               | X  |
| ENSMUSG00000107278 | 142.637 | 112.058 | 192.303 | 68.1586 | 90.2559 | 116.662 | 148.999 | 91.6921 | 0.6958   | 0.03488 | 0.77376 | <i>Gm42600</i>            | 6  |
| ENSMUSG00000040466 | 683.638 | 1291.02 | 816.168 | 4007.72 | 2298.13 | 872.272 | 930.275 | 2392.71 | -1.36278 | 0.03489 | 0.77376 | <i>Blvrbl</i>             | 7  |
| ENSMUSG00000022422 | 170.145 | 150.666 | 147.581 | 260.051 | 230.007 | 186.659 | 156.131 | 225.572 | -0.52948 | 0.0349  | 0.77376 | <i>Dscc1</i>              | 15 |
| ENSMUSG00000071192 | 31.5839 | 29.1916 | 21.2427 | 6.29156 | 8.73444 | 17.948  | 27.3394 | 10.9913 | 1.30503  | 0.03492 | 0.77376 | <i>Wfikkn1</i>            | 17 |
| ENSMUSG00000106120 | 25.4708 | 4.70832 | 17.8886 | 2.09719 | 0.97049 | 8.07659 | 16.0226 | 3.71476 | 2.08632  | 0.035   | 0.77431 | <i>Gm42697</i>            | 3  |
| ENSMUSG00000023008 | 2083.52 | 1517.02 | 1713.95 | 1305.5  | 1283.96 | 1407.12 | 1771.5  | 1332.19 | 0.41101  | 0.03503 | 0.77431 | <i>Fmnl3</i>              | 15 |
| ENSMUSG00000096944 | 19.3578 | 26.3666 | 40.2494 | 13.6317 | 12.6164 | 10.7688 | 28.6579 | 12.339  | 1.21479  | 0.03506 | 0.77431 | <i>Gm26722</i>            | 4  |
| ENSMUSG00000008129 | 644.922 | 291.916 | 674.177 | 145.754 | 306.676 | 454.982 | 537.005 | 302.471 | 0.82655  | 0.03522 | 0.77529 | <i>4930432K2<br/>IRik</i> | 8  |
| ENSMUSG00000026616 | 6.113   | 0.94166 | 4.47215 | 20.9719 | 14.5574 | 8.07659 | 3.84227 | 14.5353 | -1.92877 | 0.03522 | 0.77529 | <i>Cr2</i>                | 1  |
| ENSMUSG00000026319 | 2299.51 | 1212.86 | 2771.62 | 1190.15 | 1304.34 | 1630.57 | 2094.66 | 1375.02 | 0.60687  | 0.03523 | 0.77529 | <i>Relch</i>              | 1  |
| ENSMUSG00000032913 | 1956.16 | 1257.12 | 2132.1  | 1075.86 | 1314.05 | 1376.61 | 1781.79 | 1255.51 | 0.50462  | 0.03525 | 0.77529 | <i>Lrig2</i>              | 3  |
| ENSMUSG00000037697 | 505.342 | 474.598 | 616.039 | 676.343 | 690.992 | 778.045 | 531.993 | 715.127 | -0.42776 | 0.03535 | 0.7758  | <i>Ddhd1</i>              | 14 |
| ENSMUSG00000043800 | 2.03767 | 0       | 0       | 2.09719 | 8.73444 | 10.7688 | 0.67922 | 7.20014 | -3.40748 | 0.03535 | 0.7758  | <i>Kifc5c-ps</i>          | 10 |
| ENSMUSG00000115057 | 5.09417 | 0       | 8.9443  | 0       | 0       | 0       | 4.67949 | 0       | 4.7063   | 0.03554 | 1       | <i>Gm8705</i>             | 15 |
| ENSMUSG00000041642 | 391.232 | 428.457 | 499.763 | 357.57  | 321.233 | 278.194 | 439.817 | 318.999 | 0.46367  | 0.03557 | 0.77656 | <i>Kif21b</i>             | 1  |
| ENSMUSG00000000125 | 3.0565  | 0       | 1.11804 | 2.09719 | 15.5279 | 10.7688 | 1.39151 | 9.46463 | -2.7833  | 0.03561 | 0.77656 | <i>Wnt3</i>               | 11 |

|                    |         |         |         |         |         |         |         |         |          |         |         |                      |    |
|--------------------|---------|---------|---------|---------|---------|---------|---------|---------|----------|---------|---------|----------------------|----|
| ENSMUSG00000032419 | 3.0565  | 1.88333 | 4.47215 | 4.19437 | 8.73444 | 27.8194 | 3.13733 | 13.5827 | -2.13459 | 0.03561 | 0.77656 | <i>Tbx18</i>         | 9  |
| ENSMUSG00000063887 | 30.565  | 22.5999 | 15.6525 | 50.3325 | 38.8198 | 45.7674 | 22.9392 | 44.9732 | -0.96688 | 0.03564 | 0.77656 | <i>Nlgn1</i>         | 3  |
| ENSMUSG00000103694 | 3.0565  | 0.94166 | 7.82627 | 4.19437 | 23.2919 | 20.6402 | 3.94148 | 16.0421 | -2.05367 | 0.03565 | 0.77656 | <i>Gm37530</i>       | 4  |
| ENSMUSG00000041237 | 549.151 | 365.365 | 261.621 | 1708.16 | 1544.06 | 288.963 | 392.046 | 1180.39 | -1.59    | 0.03565 | 0.77656 | <i>Pklr</i>          | 3  |
| ENSMUSG00000020024 | 2123.25 | 1068.79 | 2124.27 | 969.949 | 1097.63 | 1447.51 | 1772.1  | 1171.69 | 0.59641  | 0.03566 | 0.77656 | <i>Cep83</i>         | 10 |
| ENSMUSG00000108584 | 8.15067 | 4.70832 | 2.23608 | 0       | 0.97049 | 0       | 5.03169 | 0.3235  | 3.85864  | 0.0357  | 1       | <i>Gm45216</i>       | 6  |
| ENSMUSG00000031845 | 2.03767 | 0.94166 | 1.11804 | 4.19437 | 5.82296 | 15.2558 | 1.36579 | 8.42438 | -2.6336  | 0.03572 | 0.77656 | <i>Bco1</i>          | 8  |
| ENSMUSG00000085389 | 2.03767 | 0.94166 | 1.11804 | 4.19437 | 8.73444 | 11.6662 | 1.36579 | 8.19834 | -2.5927  | 0.03572 | 0.77656 | <i>1700003MO7Rik</i> | 4  |
| ENSMUSG00000025968 | 2485.95 | 1865.44 | 2550.24 | 1717.6  | 1644.02 | 1826.21 | 2300.55 | 1729.27 | 0.41157  | 0.03602 | 0.78219 | <i>Ndufs1</i>        | 1  |
| ENSMUSG00000085180 | 64.1865 | 32.9582 | 36.8953 | 58.7212 | 77.6395 | 105.893 | 44.68   | 80.7513 | -0.85644 | 0.03608 | 0.78264 | <i>AI838599</i>      | 4  |
| ENSMUSG00000030180 | 5540.42 | 2520.83 | 5051.3  | 2322.63 | 2932.83 | 3384.99 | 4370.85 | 2880.15 | 0.6016   | 0.03612 | 0.78264 | <i>Kdm5a</i>         | 6  |
| ENSMUSG00000023345 | 190.522 | 202.458 | 145.345 | 247.468 | 254.269 | 262.938 | 179.442 | 254.892 | -0.50479 | 0.03616 | 0.78273 | <i>Poc1a</i>         | 9  |
| ENSMUSG00000086279 | 0       | 0       | 0       | 3.14578 | 2.91148 | 5.3844  | 0       | 3.81389 | -4.34269 | 0.03619 | 1       | <i>Gm15634</i>       | 8  |
| ENSMUSG00000095539 | 34.6404 | 10.3583 | 22.3608 | 37.7494 | 49.4952 | 53.844  | 22.4531 | 47.0295 | -1.07263 | 0.03633 | 0.78374 | <i>Gm25287</i>       | 10 |
| ENSMUSG00000048188 | 8.15067 | 5.64998 | 6.70823 | 1.04859 | 0.97049 | 0.8974  | 6.83629 | 0.97216 | 2.81637  | 0.03634 | 0.78374 | <i>Gm8181</i>        | 18 |
| ENSMUSG00000082079 | 4.07534 | 1.88333 | 5.59019 | 10.4859 | 17.4689 | 12.5636 | 3.84962 | 13.5061 | -1.82827 | 0.03634 | 0.78374 | <i>Dnmt3c</i>        | 2  |
| ENSMUSG00000082063 | 29.5462 | 8.47497 | 27.951  | 1.04859 | 9.70494 | 8.97399 | 21.9907 | 6.57584 | 1.72569  | 0.03636 | 0.78374 | <i>Gm12993</i>       | 4  |
| ENSMUSG00000085502 | 6.113   | 1.88333 | 3.35411 | 0       | 0       | 0       | 3.78348 | 0       | 4.4045   | 0.03639 | 1       | <i>Gm12320</i>       | 11 |



|                    |         |         |         |         |         |         |         |         |          |         |         |                                 |    |
|--------------------|---------|---------|---------|---------|---------|---------|---------|---------|----------|---------|---------|---------------------------------|----|
| ENSMUSG00000083255 | 6.113   | 1.88333 | 3.35411 | 0       | 0       | 0       | 3.78348 | 0       | 4.4045   | 0.03639 | 1       | <i>Gm12738</i>                  | 4  |
| ENSMUSG00000058071 | 0       | 0       | 0       | 0       | 8.73444 | 5.3844  | 0       | 4.70628 | -4.6469  | 0.03648 | 1       | <i>Olftr818</i>                 | 10 |
| ENSMUSG00000029538 | 1415.16 | 1747.73 | 2033.71 | 1190.15 | 1236.41 | 1425.07 | 1732.2  | 1283.88 | 0.43178  | 0.03648 | 0.78569 | <i>Srsf9</i>                    | 5  |
| ENSMUSG00000111212 | 22.4143 | 0.94166 | 14.5345 | 4.19437 | 0.97049 | 1.7948  | 12.6302 | 2.31989 | 2.45485  | 0.03667 | 0.78597 | <i>Gm47087</i>                  | 9  |
| ENSMUSG00000025340 | 507.379 | 457.649 | 414.792 | 720.384 | 607.529 | 545.619 | 459.94  | 624.51  | -0.44046 | 0.03667 | 0.78597 | <i>Rabgef1</i>                  | 5  |
| ENSMUSG00000046196 | 17.3202 | 15.0666 | 17.8886 | 15.7289 | 31.0558 | 74.4842 | 16.7585 | 40.423  | -1.2769  | 0.0367  | 0.78597 | <i>Ttc39d</i>                   | 17 |
| ENSMUSG00000020490 | 21.3955 | 128.066 | 226.962 | 1265.65 | 610.441 | 116.662 | 125.475 | 664.251 | -2.40455 | 0.03675 | 0.78597 | <i>Btnl10</i>                   | 11 |
| ENSMUSG00000022025 | 10.1883 | 10.3583 | 5.59019 | 44.0409 | 18.4394 | 11.6662 | 8.71228 | 24.7155 | -1.49168 | 0.03679 | 0.78597 | <i>Cnmd</i>                     | 14 |
| ENSMUSG00000049001 | 212.936 | 110.175 | 182.24  | 294.655 | 237.771 | 237.811 | 168.45  | 256.746 | -0.60909 | 0.03692 | 0.78597 | <i>Ndnf</i>                     | 6  |
| ENSMUSG00000028063 | 1067.74 | 1332.45 | 915.673 | 2155.91 | 1835.2  | 1007.78 | 1105.29 | 1666.3  | -0.59172 | 0.03693 | 0.78597 | <i>Lmna</i>                     | 3  |
| ENSMUSG00000005683 | 5953.05 | 4075.52 | 5393.42 | 3632.33 | 4147.89 | 3738.57 | 5140.66 | 3839.59 | 0.42092  | 0.03693 | 0.78597 | <i>Cs</i>                       | 10 |
| ENSMUSG00000043795 | 77.4314 | 73.4498 | 59.256  | 97.5192 | 135.869 | 98.7139 | 70.0457 | 110.701 | -0.65864 | 0.03694 | 0.78597 | <i>Prr33</i>                    | 7  |
| ENSMUSG00000020185 | 165.051 | 124.3   | 153.171 | 261.1   | 196.04  | 191.146 | 147.507 | 216.095 | -0.55078 | 0.03695 | 0.78597 | <i>E2f7</i>                     | 10 |
| ENSMUSG00000107741 | 245.539 | 142.191 | 281.746 | 103.811 | 135.869 | 176.788 | 223.159 | 138.823 | 0.68153  | 0.03696 | 0.78597 | <i>Gm2011</i>                   | 3  |
| ENSMUSG00000020520 | 303.613 | 404.915 | 391.313 | 777.008 | 485.247 | 393.061 | 366.614 | 551.772 | -0.58897 | 0.03699 | 0.78597 | <i>Galnt10</i>                  | 11 |
| ENSMUSG00000085139 | 64.1865 | 51.7915 | 41.3674 | 30.4092 | 24.2623 | 31.409  | 52.4485 | 28.6935 | 0.87138  | 0.03699 | 0.78597 | <i>A730046J1</i><br><i>9Rik</i> | X  |
| ENSMUSG00000092574 | 7.13184 | 0.94166 | 16.7706 | 0       | 1.94099 | 0.8974  | 8.28136 | 0.94613 | 3.10371  | 0.03705 | 0.78639 | <i>2810047C2</i><br><i>1Rik</i> | 7  |
| ENSMUSG00000075266 | 528.775 | 317.341 | 406.966 | 223.35  | 314.44  | 314.987 | 417.694 | 284.259 | 0.55406  | 0.03714 | 0.78704 | <i>Cenpw</i>                    | 10 |

|                    |         |         |         |         |         |         |         |         |          |         |         |                           |    |
|--------------------|---------|---------|---------|---------|---------|---------|---------|---------|----------|---------|---------|---------------------------|----|
| ENSMUSG00000046591 | 1289.84 | 610.198 | 1261.15 | 665.857 | 661.877 | 773.558 | 1053.73 | 700.431 | 0.58864  | 0.03715 | 0.78704 | <i>Ticrr</i>              | 7  |
| ENSMUSG00000045349 | 26.4897 | 12.2416 | 22.3608 | 20.9719 | 41.7312 | 75.3816 | 20.364  | 46.0282 | -1.18466 | 0.0372  | 0.78712 | <i>Sh2d5</i>              | 4  |
| ENSMUSG00000027397 | 1088.11 | 808.889 | 1284.63 | 1723.89 | 1468.36 | 1257.26 | 1060.54 | 1483.17 | -0.48413 | 0.03725 | 0.78745 | <i>Slc20a1</i>            | 2  |
| ENSMUSG00000090935 | 992.344 | 742.973 | 1056.55 | 695.217 | 610.441 | 742.149 | 930.621 | 682.602 | 0.44659  | 0.03738 | 0.7885  | <i>Synj2bp</i>            | 12 |
| ENSMUSG00000003872 | 26.4897 | 30.1332 | 33.5411 | 12.5831 | 17.4689 | 11.6662 | 30.0547 | 13.9061 | 1.11167  | 0.03741 | 0.7885  | <i>Lin7b</i>              | 7  |
| ENSMUSG00000078607 | 46.8664 | 36.7249 | 40.2494 | 59.7698 | 65.0231 | 85.2529 | 41.2802 | 70.0153 | -0.76497 | 0.03741 | 0.7885  | <i>1810010H2<br/>4Rik</i> | 11 |
| ENSMUSG00000079173 | 29.5462 | 58.3831 | 42.4854 | 68.1586 | 66.9641 | 94.2269 | 43.4716 | 76.4499 | -0.81319 | 0.03746 | 0.78878 | <i>Zan</i>                | 5  |
| ENSMUSG00000031701 | 3737.08 | 2961.53 | 4206.06 | 2770.38 | 2630.04 | 2835.78 | 3634.89 | 2745.4  | 0.40474  | 0.03766 | 0.7919  | <i>Dnaja2</i>             | 8  |
| ENSMUSG00000021176 | 49.9229 | 71.5664 | 65.9642 | 108.005 | 82.492  | 109.483 | 62.4845 | 99.9933 | -0.67781 | 0.03769 | 0.7919  | <i>Efcab11</i>            | 12 |
| ENSMUSG00000106107 | 0       | 0       | 1.11804 | 2.09719 | 7.76395 | 5.3844  | 0.37268 | 5.08184 | -3.79564 | 0.03774 | 1       | <i>Gm43190</i>            | 3  |
| ENSMUSG00000021066 | 754.956 | 335.232 | 731.197 | 225.448 | 366.847 | 507.031 | 607.128 | 366.442 | 0.72706  | 0.03779 | 0.79198 | <i>At11</i>               | 12 |
| ENSMUSG00000031893 | 15.2825 | 10.3583 | 13.4165 | 12.5831 | 35.9083 | 46.6648 | 13.0191 | 31.7187 | -1.29187 | 0.0378  | 0.79198 | <i>Tsnaxip1</i>           | 8  |
| ENSMUSG00000042351 | 19.3578 | 46.1415 | 97.2693 | 251.662 | 83.4625 | 48.4596 | 54.2562 | 127.861 | -1.23795 | 0.03781 | 0.79198 | <i>Grap2</i>              | 15 |
| ENSMUSG00000102880 | 0       | 0       | 0       | 0       | 5.82296 | 8.07659 | 0       | 4.63319 | -4.62603 | 0.03791 | 1       | <i>4930517J16<br/>Rik</i> | 4  |
| ENSMUSG00000055717 | 52.9794 | 67.7998 | 74.9086 | 95.422  | 87.3444 | 131.918 | 65.2292 | 104.895 | -0.68794 | 0.03792 | 0.79292 | <i>Slain1</i>             | 14 |
| ENSMUSG00000028158 | 401.421 | 219.408 | 471.812 | 152.046 | 217.391 | 303.321 | 364.213 | 224.253 | 0.69735  | 0.03793 | 0.79292 | <i>Mttp</i>               | 3  |
| ENSMUSG00000050890 | 963.817 | 623.381 | 1004    | 606.087 | 536.683 | 690.1   | 863.732 | 610.957 | 0.49882  | 0.03804 | 0.79426 | <i>Pdik11</i>             | 4  |
| ENSMUSG00000060461 | 79.469  | 58.3831 | 200.129 | 23.069  | 24.2623 | 98.7139 | 112.66  | 48.6818 | 1.20386  | 0.03812 | 0.79426 | <i>Dppa5a</i>             | 9  |

|                    |         |         |         |         |         |         |         |         |          |         |         |                                     |    |
|--------------------|---------|---------|---------|---------|---------|---------|---------|---------|----------|---------|---------|-------------------------------------|----|
| ENSMUSG00000047067 | 249.614 | 307.924 | 241.496 | 203.427 | 146.545 | 205.504 | 266.345 | 185.159 | 0.52535  | 0.0382  | 0.79426 | <i>Dusp28</i>                       | 1  |
| ENSMUSG00000051147 | 56.0359 | 65.9165 | 88.325  | 222.302 | 92.1969 | 74.4842 | 70.0924 | 129.661 | -0.88643 | 0.03823 | 0.79426 | <i>Nat2</i>                         | 8  |
| ENSMUSG00000050439 | 6.113   | 8.47497 | 17.8886 | 7.34015 | 38.8198 | 46.6648 | 10.8255 | 30.9416 | -1.52779 | 0.03824 | 0.79426 | <i>Enthd1</i>                       | 15 |
| ENSMUSG00000027652 | 3978.55 | 1947.36 | 3190.88 | 1741.71 | 2064.24 | 2405.93 | 3038.93 | 2070.63 | 0.55328  | 0.03827 | 0.79426 | <i>Ralgapb</i>                      | 2  |
| ENSMUSG00000024892 | 3503.77 | 1792.93 | 2767.14 | 1462.79 | 1923.52 | 2125.04 | 2687.95 | 1837.12 | 0.54882  | 0.03829 | 0.79426 | <i>Pcx</i>                          | 19 |
| ENSMUSG00000035202 | 8580.62 | 3306.18 | 2909.14 | 3139.49 | 2985.24 | 2925.52 | 4931.98 | 3016.75 | 0.7092   | 0.0383  | 0.79426 | <i>Lars2</i>                        | 9  |
| ENSMUSG00000099632 | 56.0359 | 43.3165 | 44.7215 | 29.3606 | 28.1443 | 20.6402 | 48.0246 | 26.0484 | 0.88584  | 0.03846 | 0.79673 | <sup>2900093K2</sup><br><i>ORik</i> | 2  |
| ENSMUSG00000030546 | 44.8287 | 69.6831 | 67.0823 | 37.7494 | 34.9378 | 30.5116 | 60.5314 | 34.3996 | 0.81727  | 0.0385  | 0.79682 | <i>Plin1</i>                        | 7  |
| ENSMUSG00000002831 | 28.5274 | 30.1332 | 30.187  | 12.5831 | 19.4099 | 7.1792  | 29.6159 | 13.0574 | 1.18591  | 0.03863 | 0.79845 | <i>Plin4</i>                        | 17 |
| ENSMUSG00000071230 | 6.113   | 8.47497 | 7.82627 | 0       | 0       | 2.6922  | 7.47141 | 0.8974  | 2.99974  | 0.03876 | 0.79845 | <i>Npw</i>                          | 17 |
| ENSMUSG00000037130 | 1.01883 | 0       | 0       | 2.09719 | 5.82296 | 7.1792  | 0.33961 | 5.03311 | -3.78343 | 0.03878 | 1       | <i>H2-M10.6</i>                     | 17 |
| ENSMUSG00000048416 | 538.963 | 242.949 | 777.036 | 257.954 | 256.21  | 407.419 | 519.65  | 307.195 | 0.75693  | 0.03882 | 0.79845 | <i>Mlfl</i>                         | 3  |
| ENSMUSG00000039158 | 170.145 | 211.874 | 160.997 | 262.148 | 293.089 | 220.76  | 181.006 | 258.666 | -0.51314 | 0.03887 | 0.79845 | <i>Akna</i>                         | 4  |
| ENSMUSG00000058402 | 320.933 | 256.133 | 221.372 | 196.087 | 210.597 | 129.226 | 266.146 | 178.637 | 0.57695  | 0.0389  | 0.79845 | <i>Zfp420</i>                       | 7  |
| ENSMUSG00000091649 | 13.2448 | 5.64998 | 8.9443  | 1.04859 | 1.94099 | 2.6922  | 9.27971 | 1.89393 | 2.27536  | 0.03891 | 0.79845 | <i>Phf11b</i>                       | 14 |
| ENSMUSG00000023328 | 63.1677 | 153.491 | 174.414 | 909.13  | 488.158 | 85.2529 | 130.358 | 494.181 | -1.92248 | 0.03891 | 0.79845 | <i>Ache</i>                         | 5  |
| ENSMUSG00000023170 | 855.821 | 903.997 | 778.155 | 1455.45 | 1122.86 | 916.245 | 845.991 | 1164.85 | -0.46082 | 0.03897 | 0.79845 | <i>Gps2</i>                         | 11 |
| ENSMUSG00000031343 | 79.469  | 65.9165 | 60.3741 | 111.151 | 98.0199 | 108.585 | 68.5865 | 105.919 | -0.62595 | 0.03901 | 0.79845 | <i>Gabra3</i>                       | X  |

|                    |         |         |         |         |         |         |         |         |          |         |         |                           |    |
|--------------------|---------|---------|---------|---------|---------|---------|---------|---------|----------|---------|---------|---------------------------|----|
| ENSMUSG00000032999 | 15.2825 | 11.3    | 33.5411 | 4.19437 | 2.91148 | 11.6662 | 20.0412 | 6.25735 | 1.66038  | 0.03909 | 0.79845 | <i>Nlrp4f</i>             | 13 |
| ENSMUSG00000021065 | 2700.93 | 2034.94 | 2962.8  | 1850.77 | 1776    | 2103.5  | 2566.22 | 1910.09 | 0.42573  | 0.03912 | 0.79845 | <i>Fut8</i>               | 12 |
| ENSMUSG00000003813 | 519.605 | 703.423 | 673.059 | 1633.71 | 878.297 | 552.798 | 632.029 | 1021.6  | -0.69228 | 0.03913 | 0.79845 | <i>Rad23a</i>             | 8  |
| ENSMUSG00000036561 | 643.903 | 700.598 | 727.843 | 999.309 | 973.405 | 776.251 | 690.781 | 916.322 | -0.40739 | 0.03916 | 0.79845 | <i>Ppp6r2</i>             | 15 |
| ENSMUSG00000028273 | 1181.85 | 601.723 | 1330.47 | 594.552 | 705.549 | 764.584 | 1038.01 | 688.229 | 0.59217  | 0.03916 | 0.79845 | <i>Pdlim5</i>             | 3  |
| ENSMUSG00000031220 | 9.16951 | 1.88333 | 5.59019 | 15.7289 | 16.4984 | 18.8454 | 5.54767 | 17.0242 | -1.62774 | 0.03917 | 0.79845 | <i>Awat2</i>              | X  |
| ENSMUSG00000026180 | 1.01883 | 5.64998 | 2.23608 | 27.2634 | 5.82296 | 7.1792  | 2.9683  | 13.4219 | -2.154   | 0.03919 | 0.79845 | <i>Cxcr2</i>              | 1  |
| ENSMUSG00000096029 | 0       | 0       | 0       | 3.14578 | 1.94099 | 6.2818  | 0       | 3.78952 | -4.33433 | 0.03921 | 1       | <i>Olfir679</i>           | 7  |
| ENSMUSG00000060791 | 16.3013 | 14.125  | 14.5345 | 47.1867 | 31.0558 | 20.6402 | 14.9869 | 32.9609 | -1.13276 | 0.03929 | 0.79845 | <i>Gmfg</i>               | 7  |
| ENSMUSG00000086725 | 281.198 | 116.766 | 174.414 | 100.665 | 132.958 | 116.662 | 190.793 | 116.762 | 0.70728  | 0.03929 | 0.79845 | <i>A630052C1<br/>7Rik</i> | 11 |
| ENSMUSG00000054074 | 369.837 | 300.391 | 337.648 | 242.225 | 241.653 | 256.656 | 335.958 | 246.845 | 0.44405  | 0.03931 | 0.79845 | <i>Skid1</i>              | 2  |
| ENSMUSG00000022789 | 4150.73 | 2761.9  | 4491.16 | 2635.11 | 2627.13 | 3027.83 | 3801.26 | 2763.36 | 0.45987  | 0.03942 | 0.79878 | <i>Dnm1l</i>              | 16 |
| ENSMUSG00000086507 | 9.16951 | 9.41664 | 5.59019 | 0       | 2.91148 | 0.8974  | 8.05878 | 1.26963 | 2.65603  | 0.03942 | 0.79878 | <i>Adap2os</i>            | 11 |
| ENSMUSG00000091745 | 14.2637 | 21.6583 | 19.0066 | 1.04859 | 10.6754 | 5.3844  | 18.3095 | 5.70281 | 1.67443  | 0.03956 | 0.79878 | <i>Gm17098</i>            | 9  |
| ENSMUSG00000097486 | 37.6969 | 15.0666 | 49.1937 | 17.8261 | 13.5869 | 12.5636 | 33.9857 | 14.6589 | 1.21113  | 0.03959 | 0.79878 | <i>Gm17733</i>            | 6  |
| ENSMUSG00000021276 | 1380.52 | 926.597 | 1343.88 | 729.821 | 823.949 | 1049.96 | 1217    | 867.909 | 0.48705  | 0.03959 | 0.79878 | <i>Cinp</i>               | 12 |
| ENSMUSG00000066113 | 150.787 | 159.141 | 155.407 | 241.176 | 223.214 | 191.146 | 155.112 | 218.512 | -0.49333 | 0.0396  | 0.79878 | <i>Adamts1l</i>           | 4  |
| ENSMUSG00000076862 | 0       | 0       | 17.8886 | 0       | 0       | 0       | 5.96287 | 0       | 5.05581  | 0.03961 | 1       | <i>Trav19</i>             | 14 |

|                    |         |         |         |         |         |         |         |         |          |         |         |                           |    |
|--------------------|---------|---------|---------|---------|---------|---------|---------|---------|----------|---------|---------|---------------------------|----|
| ENSMUSG00000058355 | 3414.11 | 2276    | 3455.86 | 2271.25 | 2163.23 | 2315.29 | 3048.66 | 2249.92 | 0.43813  | 0.03965 | 0.79878 | <i>Abce1</i>              | 8  |
| ENSMUSG00000027857 | 170.145 | 46.1415 | 72.6725 | 15.7289 | 26.2033 | 81.6633 | 96.3198 | 41.1985 | 1.21954  | 0.03974 | 0.79878 | <i>Tshb</i>               | 3  |
| ENSMUSG00000030075 | 88.6386 | 110.175 | 152.053 | 241.176 | 165.954 | 144.481 | 116.955 | 183.871 | -0.65314 | 0.03974 | 0.79878 | <i>Cntn3</i>              | 6  |
| ENSMUSG00000041805 | 852.764 | 276.849 | 902.257 | 114.297 | 243.594 | 400.24  | 677.29  | 252.71  | 1.42165  | 0.03977 | 0.79878 | <i>Pramell1</i>           | 4  |
| ENSMUSG00000054893 | 801.822 | 499.082 | 847.473 | 549.463 | 439.634 | 516.005 | 716.126 | 501.7   | 0.51287  | 0.03981 | 0.79878 | <i>Zfp667</i>             | 7  |
| ENSMUSG00000082396 | 171.164 | 69.6831 | 150.935 | 19.9233 | 57.2591 | 110.38  | 130.594 | 62.5208 | 1.05736  | 0.03983 | 0.79878 | <i>Zfp389</i>             | 13 |
| ENSMUSG00000094096 | 0       | 7.53331 | 0       | 2.09719 | 17.4689 | 27.8194 | 2.5111  | 15.7952 | -2.62168 | 0.03983 | 0.79878 | <i>Gm25649</i>            | 13 |
| ENSMUSG00000022847 | 19.3578 | 16.9499 | 31.3051 | 20.9719 | 49.4952 | 76.279  | 22.5376 | 48.9153 | -1.12741 | 0.03993 | 0.79878 | <i>Thpo</i>               | 16 |
| ENSMUSG00000023341 | 51.9605 | 21.6583 | 41.3674 | 16.7775 | 8.73444 | 25.1272 | 38.3287 | 16.8797 | 1.17662  | 0.03999 | 0.79878 | <i>Mx2</i>                | 16 |
| ENSMUSG00000046215 | 3.0565  | 5.64998 | 12.2984 | 1.04859 | 0.97049 | 0.8974  | 7.00163 | 0.97216 | 2.84519  | 0.04001 | 0.79878 | <i>Rprml</i>              | 11 |
| ENSMUSG00000060143 | 89.6574 | 270.257 | 105.096 | 187.698 | 331.909 | 303.321 | 155.003 | 274.309 | -0.82163 | 0.04002 | 0.79878 | <i>Gm10076</i>            | 14 |
| ENSMUSG00000021361 | 1214.45 | 1827.77 | 1563.02 | 3947.95 | 2507.76 | 1145.08 | 1535.08 | 2533.6  | -0.72265 | 0.04002 | 0.79878 | <i>Tmem14c</i>            | 13 |
| ENSMUSG00000109420 | 8.15067 | 12.2416 | 4.47215 | 1.04859 | 2.91148 | 0       | 8.28815 | 1.32002 | 2.67032  | 0.04008 | 0.79927 | <i>Gm44702</i>            | 7  |
| ENSMUSG00000087052 | 74.3749 | 29.1916 | 83.8529 | 13.6317 | 27.1738 | 45.7674 | 62.4731 | 28.8576 | 1.10499  | 0.04013 | 0.79946 | <i>Gm8093</i>             | 9  |
| ENSMUSG00000094958 | 19.3578 | 14.125  | 12.2984 | 0       | 4.85247 | 7.1792  | 15.2604 | 4.01055 | 1.90631  | 0.04028 | 0.80011 | <i>3110021N2<br/>4Rik</i> | 4  |
| ENSMUSG00000095698 | 0       | 4.70832 | 1.11804 | 10.4859 | 7.76395 | 12.5636 | 1.94212 | 10.2712 | -2.37226 | 0.0403  | 0.80011 | <i>Rhox2d</i>             | X  |
| ENSMUSG00000028351 | 92.7139 | 72.5081 | 57.0199 | 152.046 | 90.2559 | 117.559 | 74.0806 | 119.954 | -0.6926  | 0.04035 | 0.80011 | <i>Brinp1</i>             | 4  |
| ENSMUSG00000039396 | 269.991 | 244.833 | 566.845 | 1031.82 | 517.273 | 349.986 | 360.556 | 633.025 | -0.81244 | 0.04036 | 0.80011 | <i>Neil3</i>              | 8  |

|                    |         |         |         |         |         |         |         |         |          |         |         |                           |    |
|--------------------|---------|---------|---------|---------|---------|---------|---------|---------|----------|---------|---------|---------------------------|----|
| ENSMUSG00000096146 | 19.3578 | 21.6583 | 52.5478 | 13.6317 | 11.6459 | 14.3584 | 31.188  | 13.212  | 1.23274  | 0.04037 | 0.80011 | <i>Kcnj11</i>             | 7  |
| ENSMUSG00000025537 | 5.09417 | 17.8916 | 8.9443  | 25.1662 | 32.0263 | 22.435  | 10.6434 | 26.5425 | -1.30824 | 0.0404  | 0.80011 | <i>Phkg1</i>              | 5  |
| ENSMUSG00000085609 | 11.2072 | 1.88333 | 2.23608 | 0       | 0.97049 | 0       | 5.10886 | 0.3235  | 3.87786  | 0.04043 | 1       | <i>1700016P0<br/>3Rik</i> | 11 |
| ENSMUSG00000036053 | 3762.55 | 3390.93 | 5131.79 | 3012.61 | 2939.63 | 3190.25 | 4095.09 | 3047.5  | 0.4261   | 0.04043 | 0.80011 | <i>Fmnl2</i>              | 2  |
| ENSMUSG00000034412 | 571.566 | 732.614 | 604.859 | 429.923 | 518.244 | 474.724 | 636.346 | 474.297 | 0.42419  | 0.0405  | 0.80011 | <i>Tbc1d10a</i>           | 11 |
| ENSMUSG00000020023 | 89.6574 | 60.2665 | 88.325  | 141.56  | 98.0199 | 133.713 | 79.4163 | 124.431 | -0.64997 | 0.04054 | 0.80011 | <i>Tmcc3</i>              | 10 |
| ENSMUSG00000041064 | 164.032 | 200.574 | 159.879 | 389.028 | 235.83  | 187.556 | 174.829 | 270.805 | -0.62902 | 0.04055 | 0.80011 | <i>Pif1</i>               | 9  |
| ENSMUSG00000081960 | 0       | 0       | 0       | 0       | 12.6164 | 1.7948  | 0       | 4.80374 | -4.6742  | 0.04057 | 1       | <i>Mageb17-ps</i>         | X  |
| ENSMUSG00000097236 | 163.013 | 65.9165 | 69.3184 | 29.3606 | 58.2296 | 68.2024 | 99.4161 | 51.9309 | 0.93361  | 0.04061 | 0.80046 | <i>4831440E1<br/>7Rik</i> | 5  |
| ENSMUSG00000097391 | 283.236 | 301.332 | 223.608 | 377.494 | 343.555 | 389.471 | 269.392 | 370.173 | -0.45731 | 0.04074 | 0.80241 | <i>Mirg</i>               | 12 |
| ENSMUSG00000034031 | 36.678  | 92.283  | 51.4298 | 131.074 | 80.551  | 106.791 | 60.1303 | 106.139 | -0.8153  | 0.04096 | 0.806   | <i>Ccdc182</i>            | 11 |
| ENSMUSG00000096982 | 66.2242 | 125.241 | 145.345 | 655.371 | 358.112 | 79.8685 | 112.27  | 364.451 | -1.6986  | 0.04109 | 0.80769 | <i>Redrum</i>             | 18 |
| ENSMUSG00000029650 | 111.053 | 148.783 | 98.3874 | 282.072 | 214.479 | 104.996 | 119.408 | 200.515 | -0.74461 | 0.04116 | 0.80789 | <i>Slc46a3</i>            | 5  |
| ENSMUSG00000033382 | 3685.12 | 1535.85 | 3156.22 | 1411.41 | 1743.01 | 2270.42 | 2792.4  | 1808.28 | 0.62663  | 0.04119 | 0.80789 | <i>Trappc8</i>            | 18 |
| ENSMUSG00000097718 | 1.01883 | 0.94166 | 0       | 5.24297 | 2.91148 | 10.7688 | 0.6535  | 6.30775 | -3.23843 | 0.04119 | 1       | <i>Gm26896</i>            | 10 |
| ENSMUSG00000038344 | 3392.72 | 1264.65 | 3299.33 | 1054.88 | 1520.76 | 2237.22 | 2652.23 | 1604.29 | 0.72496  | 0.04122 | 0.80789 | <i>Txlng</i>              | X  |
| ENSMUSG00000051910 | 590.924 | 363.482 | 919.027 | 1538.29 | 920.028 | 647.025 | 624.478 | 1035.11 | -0.72939 | 0.04132 | 0.80827 | <i>Sox6</i>               | 7  |
| ENSMUSG00000016526 | 49.9229 | 90.3997 | 136.401 | 277.877 | 141.692 | 95.1243 | 92.2411 | 171.565 | -0.8954  | 0.04133 | 0.80827 | <i>Dyrk3</i>              | 1  |

|                    |         |         |         |         |         |         |         |         |          |         |         |                           |    |
|--------------------|---------|---------|---------|---------|---------|---------|---------|---------|----------|---------|---------|---------------------------|----|
| ENSMUSG00000043282 | 6.113   | 6.59165 | 6.70823 | 19.9233 | 17.4689 | 15.2558 | 6.47096 | 17.5493 | -1.43793 | 0.04135 | 0.80827 | <i>Teddm1b</i>            | 1  |
| ENSMUSG00000064330 | 2.03767 | 5.64998 | 6.70823 | 0       | 0       | 0.8974  | 4.79863 | 0.29913 | 3.78556  | 0.04141 | 1       | <i>Pde6h</i>              | 6  |
| ENSMUSG00000056708 | 462.551 | 575.356 | 393.549 | 671.1   | 691.962 | 590.489 | 477.152 | 651.184 | -0.44746 | 0.04165 | 0.81257 | <i>Ier5</i>               | 1  |
| ENSMUSG00000063193 | 8.15067 | 8.47497 | 3.35411 | 22.0205 | 16.4984 | 17.0506 | 6.65992 | 18.5231 | -1.46234 | 0.04165 | 0.81257 | <i>Cd300lb</i>            | 11 |
| ENSMUSG00000094724 | 99.8457 | 145.958 | 168.824 | 104.859 | 86.3739 | 74.4842 | 138.209 | 88.5725 | 0.64297  | 0.04188 | 0.81585 | <i>Rnaset2b</i>           | 17 |
| ENSMUSG00000068259 | 49.9229 | 8.47497 | 13.4165 | 0       | 9.70494 | 8.97399 | 23.9381 | 6.22631 | 1.93077  | 0.0419  | 0.81585 | <i>Olf461</i>             | 6  |
| ENSMUSG00000020808 | 327.046 | 465.182 | 344.356 | 268.44  | 276.591 | 276.399 | 378.861 | 273.81  | 0.46929  | 0.04195 | 0.81616 | <i>Pimreg</i>             | 11 |
| ENSMUSG00000097726 | 8.15067 | 9.41664 | 6.70823 | 3.14578 | 0.97049 | 0       | 8.09185 | 1.37209 | 2.6048   | 0.04199 | 0.8162  | <i>9530036O1<br/>IRik</i> | 5  |
| ENSMUSG00000109058 | 17.3202 | 0       | 0       | 0       | 0       | 0       | 5.77339 | 0       | 5.01623  | 0.04217 | 1       | <i>Olf705</i>             | 7  |
| ENSMUSG00000059657 | 36.678  | 40.4915 | 34.6592 | 156.24  | 57.2591 | 27.8194 | 37.2762 | 80.4396 | -1.10532 | 0.04225 | 0.82005 | <i>Stfa211</i>            | 16 |
| ENSMUSG00000019986 | 408.552 | 407.74  | 429.327 | 596.65  | 492.04  | 554.593 | 415.206 | 547.761 | -0.39972 | 0.04227 | 0.82005 | <i>Ahi1</i>               | 10 |
| ENSMUSG00000115338 | 398.364 | 350.299 | 338.766 | 633.35  | 555.122 | 364.344 | 362.476 | 517.606 | -0.51306 | 0.04234 | 0.8206  | <i>Pnp</i>                | 14 |
| ENSMUSG00000053012 | 1281.69 | 987.805 | 1369.6  | 896.547 | 779.307 | 1018.55 | 1213.03 | 898.134 | 0.43312  | 0.04239 | 0.82077 | <i>Krcc1</i>              | 6  |
| ENSMUSG00000035451 | 6.113   | 0.94166 | 1.11804 | 3.14578 | 13.5869 | 21.5376 | 2.72424 | 12.7568 | -2.23221 | 0.04246 | 0.82103 | <i>Foxa1</i>              | 12 |
| ENSMUSG00000053508 | 28.5274 | 14.125  | 10.0623 | 8.38875 | 4.85247 | 4.487   | 17.5715 | 5.9094  | 1.58238  | 0.04248 | 0.82103 | <i>Gtsf2</i>              | 15 |
| ENSMUSG00000085560 | 53.9982 | 6.59165 | 42.4854 | 9.43734 | 6.79346 | 19.7428 | 34.3584 | 11.9912 | 1.50941  | 0.04258 | 0.82179 | <i>C230038L0<br/>3Rik</i> | 7  |
| ENSMUSG00000020228 | 283.236 | 291.916 | 328.703 | 588.261 | 424.106 | 307.808 | 301.285 | 440.058 | -0.54589 | 0.0426  | 0.82179 | <i>Helb</i>               | 10 |
| ENSMUSG00000073000 | 1.01883 | 9.41664 | 6.70823 | 18.8747 | 24.2623 | 11.6662 | 5.71457 | 18.2677 | -1.66953 | 0.04288 | 0.82483 | <i>Gm10451</i>            | 12 |

|                    |         |         |         |         |         |         |         |         |          |         |         |                           |    |
|--------------------|---------|---------|---------|---------|---------|---------|---------|---------|----------|---------|---------|---------------------------|----|
| ENSMUSG00000061533 | 237.388 | 205.283 | 287.336 | 478.158 | 356.171 | 252.169 | 243.336 | 362.166 | -0.57362 | 0.04293 | 0.82483 | <i>Cep128</i>             | 12 |
| ENSMUSG00000082033 | 91.6951 | 32.9582 | 105.096 | 14.6803 | 66.9641 | 17.948  | 76.583  | 33.1975 | 1.20337  | 0.04301 | 0.82483 | <i>Mageb10-ps</i>         | X  |
| ENSMUSG00000042401 | 32.6027 | 10.3583 | 20.1247 | 19.9233 | 55.3181 | 67.305  | 21.0286 | 47.5155 | -1.18248 | 0.04303 | 0.82483 | <i>Crtac1</i>             | 19 |
| ENSMUSG00000048732 | 445.23  | 127.125 | 250.441 | 98.5678 | 188.276 | 176.788 | 274.265 | 154.544 | 0.82608  | 0.04307 | 0.82483 | <i>Klhl11</i>             | 11 |
| ENSMUSG00000025492 | 499.229 | 537.69  | 512.061 | 357.57  | 254.269 | 470.237 | 516.327 | 360.692 | 0.51695  | 0.04307 | 0.82483 | <i>Ifitm3</i>             | 7  |
| ENSMUSG00000026725 | 12.226  | 0.94166 | 8.9443  | 39.8465 | 16.4984 | 13.461  | 7.37066 | 23.2686 | -1.66544 | 0.04314 | 0.82483 | <i>Tnn</i>                | 1  |
| ENSMUSG00000011832 | 1296.98 | 1172.37 | 1156.05 | 908.082 | 870.533 | 1028.42 | 1208.47 | 935.678 | 0.36892  | 0.04317 | 0.82483 | <i>Evi5l</i>              | 8  |
| ENSMUSG00000108521 | 3.0565  | 0.94166 | 1.11804 | 6.29156 | 8.73444 | 10.7688 | 1.7054  | 8.59827 | -2.33776 | 0.04322 | 0.82483 | <i>Gm44639</i>            | 7  |
| ENSMUSG00000085572 | 6.113   | 3.76665 | 12.2984 | 7.34015 | 14.5574 | 48.4596 | 7.39269 | 23.4524 | -1.68389 | 0.04323 | 0.82483 | <i>Gm16234</i>            | 10 |
| ENSMUSG00000062391 | 77.4314 | 80.9831 | 45.8396 | 110.102 | 101.902 | 113.072 | 68.0847 | 108.359 | -0.66649 | 0.04325 | 0.82483 | <i>4932435O2<br/>2Rik</i> | 11 |
| ENSMUSG00000078566 | 476.814 | 390.79  | 465.104 | 340.793 | 330.938 | 328.448 | 444.236 | 333.393 | 0.41373  | 0.04326 | 0.82483 | <i>Bnip3</i>              | 7  |
| ENSMUSG00000073716 | 197.654 | 82.8664 | 95.0332 | 46.1381 | 106.754 | 50.2544 | 125.184 | 67.7156 | 0.88614  | 0.04327 | 0.82483 | <i>Gm13241</i>            | 4  |
| ENSMUSG00000024786 | 928.158 | 366.307 | 836.293 | 221.253 | 393.05  | 627.282 | 710.252 | 413.862 | 0.77803  | 0.04333 | 0.82507 | <i>Majin</i>              | 19 |
| ENSMUSG00000106103 | 21.3955 | 29.1916 | 22.3608 | 14.6803 | 10.6754 | 4.487   | 24.3159 | 9.94758 | 1.30274  | 0.04338 | 0.82517 | <i>Gm43081</i>            | 5  |
| ENSMUSG00000069306 | 25.4708 | 8.47497 | 2.23608 | 5.24297 | 0.97049 | 0.8974  | 12.0606 | 2.37029 | 2.37473  | 0.04345 | 0.82517 | <i>Hist1h4m</i>           | 13 |
| ENSMUSG00000075707 | 55.017  | 74.3914 | 40.2494 | 89.1304 | 81.5215 | 108.585 | 56.5526 | 93.0791 | -0.71504 | 0.04356 | 0.82517 | <i>Dio3</i>               | 12 |
| ENSMUSG00000029178 | 900.649 | 892.697 | 1332.7  | 2392.89 | 1340.25 | 1052.65 | 1042.02 | 1595.26 | -0.6144  | 0.04356 | 0.82517 | <i>Klf3</i>               | 5  |
| ENSMUSG00000057054 | 948.534 | 520.74  | 633.928 | 255.857 | 432.84  | 634.461 | 701.067 | 441.053 | 0.66762  | 0.04362 | 0.82517 | <i>Inca1</i>              | 11 |



|                    |         |         |         |         |         |         |         |         |          |         |         |                           |    |
|--------------------|---------|---------|---------|---------|---------|---------|---------|---------|----------|---------|---------|---------------------------|----|
| ENSMUSG00000095687 | 47.8852 | 54.6165 | 64.8462 | 33.555  | 26.2033 | 35.896  | 55.7826 | 31.8848 | 0.80489  | 0.04363 | 0.82517 | <i>Rnaset2a</i>           | 17 |
| ENSMUSG00000034997 | 16.3013 | 15.0666 | 7.82627 | 45.0895 | 21.3509 | 24.2298 | 13.0647 | 30.2234 | -1.19965 | 0.04363 | 0.82517 | <i>Htr2a</i>              | 14 |
| ENSMUSG00000045179 | 14.2637 | 8.47497 | 11.1804 | 6.29156 | 32.0263 | 55.6388 | 11.3063 | 31.3189 | -1.47691 | 0.04365 | 0.82517 | <i>Sox3</i>               | X  |
| ENSMUSG00000078427 | 916.951 | 744.856 | 967.103 | 793.785 | 617.234 | 417.291 | 876.303 | 609.437 | 0.52446  | 0.04384 | 0.82586 | <i>Sarnp</i>              | 10 |
| ENSMUSG00000115725 | 6.113   | 1.88333 | 11.1804 | 39.8465 | 11.6459 | 10.7688 | 6.39224 | 20.7538 | -1.71063 | 0.04385 | 0.82586 | <i>4930572G0<br/>2Rik</i> | 14 |
| ENSMUSG00000047773 | 5.09417 | 1.88333 | 1.11804 | 4.19437 | 24.2623 | 8.07659 | 2.69851 | 12.1778 | -2.16972 | 0.04388 | 0.82586 | <i>Ankfn1</i>             | 11 |
| ENSMUSG00000026277 | 6224.06 | 3847.64 | 5039    | 2906.7  | 3750.96 | 4219.57 | 5036.9  | 3625.74 | 0.47412  | 0.04393 | 0.82586 | <i>Stk25</i>              | 1  |
| ENSMUSG00000037887 | 82.5255 | 114.883 | 125.22  | 299.898 | 154.309 | 101.406 | 107.543 | 185.204 | -0.78266 | 0.04398 | 0.82586 | <i>Dusp8</i>              | 7  |
| ENSMUSG00000049287 | 239.426 | 308.866 | 226.962 | 560.997 | 398.873 | 239.606 | 258.418 | 399.825 | -0.6279  | 0.04399 | 0.82586 | <i>Iba57</i>              | 11 |
| ENSMUSG00000103633 | 10.1883 | 3.76665 | 6.70823 | 0       | 0.97049 | 1.7948  | 6.88774 | 0.92176 | 2.86037  | 0.04401 | 0.82586 | <i>Gm38328</i>            | 1  |
| ENSMUSG00000024087 | 1940.88 | 1551.86 | 1709.48 | 1093.68 | 1391.69 | 1445.71 | 1734.07 | 1310.36 | 0.40388  | 0.04404 | 0.82586 | <i>Cyp1b1</i>             | 17 |
| ENSMUSG00000021678 | 12.226  | 21.6583 | 13.4165 | 58.7212 | 32.0263 | 17.948  | 15.7669 | 36.2318 | -1.19055 | 0.04406 | 0.82586 | <i>F2rl1</i>              | 13 |
| ENSMUSG00000097429 | 0       | 0       | 0       | 5.24297 | 3.88198 | 1.7948  | 0       | 3.63991 | -4.26886 | 0.04411 | 1       | <i>Gm26520</i>            | 12 |
| ENSMUSG00000027306 | 838.5   | 920.947 | 1397.55 | 2710.61 | 1313.08 | 1030.21 | 1052.33 | 1684.64 | -0.67882 | 0.04411 | 0.82586 | <i>Nusap1</i>             | 2  |
| ENSMUSG00000040657 | 31.5839 | 24.4833 | 15.6525 | 100.665 | 65.9936 | 10.7688 | 23.9065 | 59.1424 | -1.30126 | 0.04412 | 0.82586 | <i>1700063H0<br/>4Rik</i> | 6  |
| ENSMUSG00000043050 | 1.01883 | 0       | 1.11804 | 2.09719 | 8.73444 | 8.07659 | 0.71229 | 6.30274 | -3.18852 | 0.0444  | 1       | <i>Tnp2</i>               | 16 |
| ENSMUSG00000087436 | 0       | 0.94166 | 0       | 6.29156 | 1.94099 | 6.2818  | 0.31389 | 4.83811 | -3.72153 | 0.04443 | 1       | <i>Gm16156</i>            | 8  |
| ENSMUSG00000030549 | 46.8664 | 19.7749 | 44.7215 | 9.43734 | 19.4099 | 21.5376 | 37.1209 | 16.7949 | 1.13443  | 0.04447 | 0.83164 | <i>Rhcg</i>               | 7  |

|                    |         |         |         |         |         |         |         |         |          |         |         |                           |    |
|--------------------|---------|---------|---------|---------|---------|---------|---------|---------|----------|---------|---------|---------------------------|----|
| ENSMUSG00000034883 | 403.458 | 169.499 | 458.396 | 149.949 | 211.568 | 262.938 | 343.784 | 208.152 | 0.72176  | 0.04459 | 0.83187 | <i>Lrr1</i>               | 12 |
| ENSMUSG00000074704 | 1552.7  | 389.849 | 1332.7  | 210.767 | 326.086 | 663.178 | 1091.75 | 400.01  | 1.44817  | 0.0446  | 0.83187 | <i>Rad21l</i>             | 2  |
| ENSMUSG00000098202 | 10.1883 | 7.53331 | 6.70823 | 2.09719 | 1.94099 | 0.8974  | 8.14329 | 1.64519 | 2.32192  | 0.04461 | 0.83187 | <i>B830012L1<br/>4Rik</i> | 12 |
| ENSMUSG00000037469 | 17.3202 | 6.59165 | 13.4165 | 0       | 1.94099 | 6.2818  | 12.4428 | 2.74093 | 2.1494   | 0.04466 | 0.83213 | <i>Acp7</i>               | 7  |
| ENSMUSG00000018143 | 188.484 | 267.432 | 329.821 | 725.626 | 365.876 | 231.529 | 261.913 | 441.011 | -0.75123 | 0.04474 | 0.83284 | <i>Mafk</i>               | 5  |
| ENSMUSG00000035232 | 1899.11 | 1305.15 | 2034.83 | 1198.54 | 1252.91 | 1403.53 | 1746.36 | 1284.99 | 0.44218  | 0.04483 | 0.83372 | <i>Pdk3</i>               | X  |
| ENSMUSG00000105284 | 4.07534 | 0       | 8.9443  | 0       | 0       | 0       | 4.33988 | 0       | 4.59697  | 0.04499 | 1       | <i>Gm42693</i>            | 3  |
| ENSMUSG00000025766 | 646.96  | 397.382 | 603.741 | 396.368 | 355.201 | 422.675 | 549.361 | 391.415 | 0.48827  | 0.04502 | 0.83654 | <i>D3Erd751e</i>          | 3  |
| ENSMUSG00000112203 | 29.5462 | 25.4249 | 44.7215 | 14.6803 | 15.5279 | 17.948  | 33.2309 | 16.0521 | 1.04338  | 0.04507 | 0.83674 | <i>Gm49167</i>            | 10 |
| ENSMUSG00000101641 | 0       | 4.70832 | 0       | 9.43734 | 22.3214 | 1.7948  | 1.56944 | 11.1845 | -2.78644 | 0.04517 | 0.83786 | <i>Gm29560</i>            | 3  |
| ENSMUSG00000022679 | 194.597 | 143.133 | 182.24  | 134.22  | 101.902 | 120.252 | 173.323 | 118.791 | 0.54473  | 0.04532 | 0.83991 | <i>Mpv17l</i>             | 16 |
| ENSMUSG00000025872 | 1109.51 | 1032.06 | 1362.89 | 865.089 | 857.917 | 948.551 | 1168.15 | 890.519 | 0.39099  | 0.04548 | 0.84114 | <i>Thoc3</i>              | 13 |
| ENSMUSG00000037738 | 0       | 5.64998 | 1.11804 | 4.19437 | 13.5869 | 17.0506 | 2.25601 | 11.6106 | -2.33804 | 0.04551 | 0.84114 | <i>Nek5</i>               | 8  |
| ENSMUSG00000086363 | 13.2448 | 8.47497 | 22.3608 | 3.14578 | 2.91148 | 7.1792  | 14.6935 | 4.41215 | 1.71731  | 0.04554 | 0.84114 | <i>A330102I10<br/>Rik</i> | 13 |
| ENSMUSG00000001632 | 1500.74 | 1035.83 | 1360.65 | 898.644 | 1029.69 | 991.626 | 1299.07 | 973.322 | 0.41614  | 0.04555 | 0.84114 | <i>Brpf1</i>              | 6  |
| ENSMUSG00000074215 | 139.58  | 109.233 | 84.9709 | 54.5268 | 67.9346 | 86.1503 | 111.261 | 69.5373 | 0.67648  | 0.04563 | 0.84197 | <i>Gm10643</i>            | 8  |
| ENSMUSG00000110126 | 1.01883 | 5.64998 | 52.5478 | 4.19437 | 5.82296 | 2.6922  | 19.7389 | 4.23651 | 2.21642  | 0.04571 | 0.84263 | <i>Gm9347</i>             | 7  |
| ENSMUSG00000061353 | 719.297 | 798.531 | 688.711 | 1248.87 | 776.395 | 993.421 | 735.513 | 1006.23 | -0.45165 | 0.04587 | 0.84414 | <i>Cxcl12</i>             | 6  |

|                    |         |         |         |         |         |         |         |         |          |         |         |                  |    |
|--------------------|---------|---------|---------|---------|---------|---------|---------|---------|----------|---------|---------|------------------|----|
| ENSMUSG00000034041 | 173.202 | 198.691 | 229.198 | 659.565 | 296.001 | 134.61  | 200.364 | 363.392 | -0.85807 | 0.04589 | 0.84414 | <i>Lyl1</i>      | 8  |
| ENSMUSG00000028008 | 0       | 0       | 0       | 0       | 5.82296 | 7.1792  | 0       | 4.33405 | -4.52958 | 0.0459  | 1       | <i>Asic5</i>     | 3  |
| ENSMUSG00000086604 | 65.2054 | 28.2499 | 58.138  | 22.0205 | 26.2033 | 30.5116 | 50.5311 | 26.2451 | 0.93936  | 0.04592 | 0.84414 | <i>Gm15510</i>   | 7  |
| ENSMUSG00000051246 | 140.599 | 62.1498 | 82.7348 | 45.0895 | 56.2886 | 64.6128 | 95.1612 | 55.3303 | 0.77959  | 0.04598 | 0.84454 | <i>Msantd1</i>   | 5  |
| ENSMUSG00000030521 | 954.647 | 597.015 | 993.936 | 534.783 | 531.831 | 722.407 | 848.533 | 596.34  | 0.50794  | 0.04605 | 0.84462 | <i>Mphosph10</i> | 7  |
| ENSMUSG00000020419 | 995.401 | 339.941 | 1304.75 | 195.038 | 295.03  | 548.311 | 880.031 | 346.127 | 1.34577  | 0.04606 | 0.84462 | <i>Hormad2</i>   | 11 |
| ENSMUSG00000074280 | 1.01883 | 7.53331 | 45.8396 | 6.29156 | 2.91148 | 2.6922  | 18.1306 | 3.96508 | 2.19497  | 0.04611 | 0.84472 | <i>Gm6166</i>    | 9  |
| ENSMUSG00000025747 | 588.886 | 662.931 | 592.56  | 1028.67 | 846.271 | 647.025 | 614.792 | 840.655 | -0.45067 | 0.04616 | 0.84493 | <i>Tyms</i>      | 5  |
| ENSMUSG00000052539 | 1345.88 | 682.706 | 1264.5  | 612.378 | 710.401 | 909.963 | 1097.7  | 744.248 | 0.55994  | 0.04621 | 0.84493 | <i>Magi3</i>     | 3  |
| ENSMUSG00000081670 | 89.6574 | 30.1332 | 68.2003 | 14.6803 | 24.2623 | 49.357  | 62.6636 | 29.4332 | 1.0818   | 0.04624 | 0.84493 | <i>Gm15697</i>   | 6  |
| ENSMUSG00000106678 | 38.7157 | 46.1415 | 44.7215 | 18.8747 | 13.5869 | 33.2038 | 43.1929 | 21.8885 | 0.97489  | 0.04628 | 0.84493 | <i>Gm43457</i>   | 5  |
| ENSMUSG00000081188 | 0       | 0       | 0       | 7.34015 | 1.94099 | 1.7948  | 0       | 3.69198 | -4.28727 | 0.04632 | 1       | <i>Gm14621</i>   | X  |
| ENSMUSG00000105517 | 4.07534 | 1.88333 | 4.47215 | 0       | 0       | 0       | 3.47694 | 0       | 4.28055  | 0.04633 | 1       | <i>Gm42436</i>   | 3  |
| ENSMUSG00000070002 | 1067.74 | 922.83  | 1036.42 | 787.493 | 709.431 | 841.761 | 1009    | 779.562 | 0.37188  | 0.04643 | 0.8453  | <i>Ell</i>       | 8  |
| ENSMUSG00000026110 | 184.409 | 108.291 | 146.463 | 162.532 | 246.505 | 254.861 | 146.388 | 221.3   | -0.59829 | 0.04648 | 0.8453  | <i>Mgat4a</i>    | 1  |
| ENSMUSG00000090071 | 1.01883 | 3.76665 | 2.23608 | 3.14578 | 12.6164 | 16.1532 | 2.34052 | 10.6385 | -2.17999 | 0.0465  | 0.8453  | <i>Cdk5r2</i>    | 1  |
| ENSMUSG00000021929 | 2202.72 | 1478.41 | 2471.98 | 1486.91 | 1521.73 | 1502.25 | 2051.04 | 1503.63 | 0.44763  | 0.04653 | 0.8453  | <i>Kpna3</i>     | 14 |
| ENSMUSG00000059336 | 184.409 | 113     | 206.837 | 790.639 | 596.854 | 107.688 | 168.082 | 498.394 | -1.56821 | 0.04654 | 0.8453  | <i>Slc14a1</i>   | 18 |

|                    |         |         |         |         |         |         |         |         |          |         |         |                 |    |
|--------------------|---------|---------|---------|---------|---------|---------|---------|---------|----------|---------|---------|-----------------|----|
| ENSMUSG00000085282 | 19.3578 | 27.3082 | 30.187  | 44.0409 | 42.7017 | 52.9466 | 25.6177 | 46.5631 | -0.86477 | 0.04657 | 0.8453  | <i>Gm15663</i>  | 10 |
| ENSMUSG00000043719 | 690.769 | 755.214 | 601.505 | 918.568 | 962.73  | 804.967 | 682.496 | 895.422 | -0.39106 | 0.04659 | 0.8453  | <i>Col6a6</i>   | 9  |
| ENSMUSG00000109105 | 15.2825 | 4.70832 | 0       | 18.8747 | 252.328 | 5.3844  | 6.66361 | 92.1958 | -3.78827 | 0.04669 | 0.84639 | <i>Gm44873</i>  | 7  |
| ENSMUSG00000078752 | 3.0565  | 6.59165 | 1.11804 | 0       | 0       | 0       | 3.58873 | 0       | 4.33667  | 0.0467  | 1       | <i>Scgb1b30</i> | 7  |
| ENSMUSG00000104965 | 50.9417 | 39.5499 | 45.8396 | 24.1176 | 28.1443 | 23.3324 | 45.4437 | 25.1981 | 0.85013  | 0.04678 | 0.84692 | <i>Gm43437</i>  | 3  |
| ENSMUSG00000086464 | 22.4143 | 4.70832 | 15.6525 | 1.04859 | 3.88198 | 6.2818  | 14.2584 | 3.73745 | 1.91039  | 0.0468  | 0.84692 | <i>Gm15835</i>  | 16 |
| ENSMUSG00000026650 | 0       | 0       | 0       | 1.04859 | 0.97049 | 9.87139 | 0       | 3.96349 | -4.40327 | 0.04682 | 1       | <i>Meigl</i>    | 2  |
| ENSMUSG00000087601 | 0       | 0       | 0       | 1.04859 | 0.97049 | 9.87139 | 0       | 3.96349 | -4.40327 | 0.04682 | 1       | <i>Uchl1os</i>  | 5  |
| ENSMUSG00000052270 | 5.09417 | 0.94166 | 3.35411 | 26.2148 | 11.6459 | 2.6922  | 3.12998 | 13.5177 | -2.11402 | 0.04699 | 0.84876 | <i>Fpr2</i>     | 17 |
| ENSMUSG00000022797 | 6505.25 | 4002.07 | 8406.53 | 16640.1 | 9579.74 | 5095.43 | 6304.62 | 10438.4 | -0.72743 | 0.047   | 0.84876 | <i>Tfrc</i>     | 16 |
| ENSMUSG00000103445 | 30.565  | 32.9582 | 23.4788 | 48.2353 | 60.1706 | 45.7674 | 29.0007 | 51.3911 | -0.82148 | 0.04705 | 0.84876 | <i>Gm36948</i>  | 9  |
| ENSMUSG00000084998 | 46.8664 | 43.3165 | 40.2494 | 25.1662 | 29.1148 | 15.2558 | 43.4774 | 23.1789 | 0.91213  | 0.04709 | 0.84876 | <i>Gm16279</i>  | 17 |
| ENSMUSG00000092274 | 369.837 | 413.39  | 297.398 | 574.629 | 724.959 | 327.551 | 360.208 | 542.38  | -0.5894  | 0.04714 | 0.84876 | <i>Neat1</i>    | 19 |
| ENSMUSG00000107412 | 10.1883 | 4.70832 | 7.82627 | 0       | 1.94099 | 1.7948  | 7.57431 | 1.24526 | 2.57566  | 0.04721 | 0.84876 | <i>Gm20383</i>  | 6  |
| ENSMUSG00000021470 | 2445.2  | 1126.23 | 2175.7  | 1114.65 | 1192.74 | 1568.65 | 1915.71 | 1292.02 | 0.5679   | 0.04722 | 0.84876 | <i>Ercc6l2</i>  | 13 |
| ENSMUSG00000029372 | 38.7157 | 2.82499 | 13.4165 | 4.19437 | 1.94099 | 8.07659 | 18.319  | 4.73732 | 1.94143  | 0.0473  | 0.84876 | <i>Ppbp</i>     | 5  |
| ENSMUSG00000107849 | 5.09417 | 7.53331 | 14.5345 | 40.8951 | 39.7902 | 3.5896  | 9.05399 | 28.0917 | -1.63701 | 0.04733 | 0.84876 | <i>Gm43904</i>  | 6  |
| ENSMUSG00000041607 | 246.558 | 202.458 | 237.024 | 395.32  | 380.434 | 224.35  | 228.68  | 333.368 | -0.54322 | 0.04733 | 0.84876 | <i>Mbp</i>      | 18 |

|                    |         |         |         |         |         |         |         |         |          |         |         |                           |    |
|--------------------|---------|---------|---------|---------|---------|---------|---------|---------|----------|---------|---------|---------------------------|----|
| ENSMUSG00000085818 | 5.09417 | 0.94166 | 0       | 6.29156 | 15.5279 | 8.97399 | 2.01194 | 10.2645 | -2.34182 | 0.04735 | 0.84876 | <i>Gm13267</i>            | 2  |
| ENSMUSG00000020267 | 2435.01 | 2306.13 | 2432.85 | 1838.18 | 1825.5  | 2035.3  | 2391.33 | 1899.66 | 0.33193  | 0.04752 | 0.84937 | <i>Hint1</i>              | 11 |
| ENSMUSG00000113020 | 2.03767 | 0       | 11.1804 | 0       | 0       | 0       | 4.40602 | 0       | 4.61746  | 0.04753 | 1       | <i>Gm48063</i>            | 12 |
| ENSMUSG00000039632 | 26.4897 | 17.8916 | 16.7706 | 22.0205 | 52.4067 | 50.2544 | 20.384  | 41.5605 | -1.03021 | 0.04754 | 0.84937 | <i>Ccdc151</i>            | 9  |
| ENSMUSG00000059412 | 17.3202 | 52.7332 | 27.951  | 38.7979 | 107.725 | 54.7414 | 32.6681 | 67.088  | -1.03446 | 0.04756 | 0.84937 | <i>Fxyd2</i>              | 9  |
| ENSMUSG00000061755 | 2848.66 | 1582.94 | 2752.61 | 1641.05 | 1647.9  | 1842.36 | 2394.74 | 1710.44 | 0.48525  | 0.04764 | 0.84937 | <i>Bod11</i>              | 5  |
| ENSMUSG00000024663 | 700.958 | 1045.25 | 988.346 | 2228.26 | 1265.52 | 797.788 | 911.517 | 1430.52 | -0.64985 | 0.04766 | 0.84937 | <i>Rab3il1</i>            | 19 |
| ENSMUSG00000038506 | 814.048 | 631.856 | 837.411 | 556.803 | 540.565 | 622.795 | 761.105 | 573.388 | 0.40787  | 0.04766 | 0.84937 | <i>Dcun1d2</i>            | 8  |
| ENSMUSG00000095040 | 8.15067 | 3.76665 | 6.70823 | 2.09719 | 0       | 0       | 6.20852 | 0.69906 | 3.2137   | 0.04766 | 1       | <i>1700001J03<br/>Rik</i> | 5  |
| ENSMUSG00000032254 | 2219.02 | 1237.35 | 2383.66 | 1623.22 | 1117.04 | 1289.56 | 1946.67 | 1343.27 | 0.53515  | 0.04768 | 0.84937 | <i>Kif23</i>              | 9  |
| ENSMUSG00000030922 | 306.669 | 125.241 | 232.552 | 73.4015 | 107.725 | 199.223 | 221.487 | 126.783 | 0.80178  | 0.04779 | 0.84937 | <i>Lymr1</i>              | 7  |
| ENSMUSG00000093682 | 9.16951 | 10.3583 | 10.0623 | 17.8261 | 21.3509 | 29.6142 | 9.86338 | 22.9304 | -1.22011 | 0.04782 | 0.84937 | <i>Gm20681</i>            | 8  |
| ENSMUSG00000097392 | 853.783 | 644.098 | 1151.58 | 560.997 | 604.618 | 713.433 | 883.153 | 626.349 | 0.49477  | 0.04783 | 0.84937 | <i>D930016D0<br/>6Rik</i> | 5  |
| ENSMUSG00000104093 | 15.2825 | 4.70832 | 6.70823 | 3.14578 | 0       | 1.7948  | 8.89969 | 1.64686 | 2.44689  | 0.04784 | 0.84937 | <i>A330015K0<br/>6Rik</i> | 3  |
| ENSMUSG00000030759 | 2769.19 | 2033.05 | 3194.23 | 2082.51 | 2009.89 | 1876.46 | 2665.49 | 1989.62 | 0.42176  | 0.04794 | 0.85007 | <i>Far1</i>               | 7  |
| ENSMUSG00000037685 | 1043.29 | 1206.27 | 1196.3  | 2327.88 | 1761.45 | 992.524 | 1148.62 | 1693.95 | -0.5602  | 0.04803 | 0.85007 | <i>Atp8a1</i>             | 5  |
| ENSMUSG00000041827 | 45.8475 | 34.8416 | 26.8329 | 14.6803 | 9.70494 | 26.0246 | 35.8407 | 16.8033 | 1.08815  | 0.04805 | 0.85007 | <i>Oasl1</i>              | 5  |
| ENSMUSG00000093688 | 22.4143 | 6.59165 | 10.0623 | 2.09719 | 1.94099 | 6.2818  | 13.0228 | 3.43999 | 1.90309  | 0.04809 | 0.85007 | <i>Gm8488</i>             | 5  |

|                    |         |         |         |         |         |         |         |         |          |         |         |                           |    |
|--------------------|---------|---------|---------|---------|---------|---------|---------|---------|----------|---------|---------|---------------------------|----|
| ENSMUSG00000041920 | 141.618 | 106.408 | 137.519 | 315.627 | 257.181 | 90.6373 | 128.515 | 221.148 | -0.78224 | 0.04811 | 0.85007 | <i>Slc16a6</i>            | 11 |
| ENSMUSG00000031465 | 129.392 | 86.6331 | 55.9019 | 115.345 | 162.072 | 162.429 | 90.6423 | 146.616 | -0.69272 | 0.04817 | 0.85007 | <i>Angpt2</i>             | 8  |
| ENSMUSG00000068205 | 485.984 | 308.866 | 410.32  | 168.824 | 301.824 | 330.243 | 401.723 | 266.963 | 0.5879   | 0.04824 | 0.85007 | <i>MacroD2</i>            | 2  |
| ENSMUSG00000073139 | 1100.34 | 925.655 | 1211.95 | 761.279 | 834.625 | 879.451 | 1079.32 | 825.118 | 0.38684  | 0.04825 | 0.85007 | <i>Tmem185a</i>           | X  |
| ENSMUSG00000061601 | 317.876 | 154.433 | 272.801 | 100.665 | 131.987 | 222.555 | 248.37  | 151.736 | 0.70806  | 0.04825 | 0.85007 | <i>Pclo</i>               | 5  |
| ENSMUSG00000086206 | 23.4332 | 2.82499 | 12.2984 | 2.09719 | 2.91148 | 4.487   | 12.8522 | 3.16522 | 2.0083   | 0.04849 | 0.85309 | <i>Gm13783</i>            | 2  |
| ENSMUSG00000113637 | 24.452  | 18.8333 | 2.23608 | 7.34015 | 2.91148 | 0.8974  | 15.1738 | 3.71634 | 2.05403  | 0.04859 | 0.85309 | <i>Gm7049</i>             | 13 |
| ENSMUSG00000097467 | 82.5255 | 102.641 | 84.9709 | 42.9923 | 47.5542 | 75.3816 | 90.0459 | 55.3094 | 0.70008  | 0.04866 | 0.85309 | <i>Gm26737</i>            | 9  |
| ENSMUSG00000022111 | 676.506 | 595.131 | 838.529 | 400.563 | 455.162 | 644.333 | 703.389 | 500.019 | 0.49108  | 0.04868 | 0.85309 | <i>Uchl3</i>              | 14 |
| ENSMUSG00000020264 | 5.09417 | 2.82499 | 5.59019 | 11.5345 | 10.6754 | 19.7428 | 4.50312 | 13.9842 | -1.64814 | 0.0487  | 0.85309 | <i>Slc36a2</i>            | 11 |
| ENSMUSG00000028961 | 2714.17 | 2459.63 | 2477.57 | 1881.18 | 2106.94 | 2079.27 | 2550.46 | 2022.46 | 0.33456  | 0.04871 | 0.85309 | <i>Pgd</i>                | 4  |
| ENSMUSG00000099759 | 117.166 | 123.358 | 124.102 | 111.151 | 52.4067 | 64.6128 | 121.542 | 76.0568 | 0.67964  | 0.04876 | 0.85309 | <i>1700030C1<br/>ORik</i> | 12 |
| ENSMUSG00000026878 | 4402.38 | 3684.73 | 5533.17 | 3677.42 | 3232.71 | 3384.99 | 4540.09 | 3431.71 | 0.4037   | 0.04882 | 0.85309 | <i>Rab14</i>              | 2  |
| ENSMUSG00000026502 | 1228.71 | 969.914 | 1473.57 | 935.345 | 999.609 | 771.764 | 1224.07 | 902.239 | 0.4399   | 0.04883 | 0.85309 | <i>Desi2</i>              | 1  |
| ENSMUSG00000065401 | 6.113   | 7.53331 | 13.4165 | 77.5959 | 21.3509 | 0.8974  | 9.02092 | 33.2814 | -1.88388 | 0.04886 | 0.85309 | <i>Mir144</i>             | 11 |
| ENSMUSG00000089827 | 18.339  | 6.59165 | 15.6525 | 19.9233 | 22.3214 | 53.844  | 13.5277 | 32.0295 | -1.25422 | 0.04887 | 0.85309 | <i>1700023H0<br/>6Rik</i> | 13 |
| ENSMUSG00000068686 | 12.226  | 32.9582 | 19.0066 | 70.2557 | 48.5247 | 21.5376 | 21.397  | 46.7727 | -1.11972 | 0.04892 | 0.85317 | <i>Cd59b</i>              | 2  |
| ENSMUSG00000048170 | 1887.9  | 1525.5  | 2213.72 | 1468.03 | 1283.96 | 1498.66 | 1875.7  | 1416.88 | 0.40442  | 0.04904 | 0.85345 | <i>Mcmbp</i>              | 7  |

|                    |         |         |         |         |         |         |         |         |          |         |         |                           |    |
|--------------------|---------|---------|---------|---------|---------|---------|---------|---------|----------|---------|---------|---------------------------|----|
| ENSMUSG00000085827 | 28.5274 | 7.53331 | 14.5345 | 3.14578 | 7.76395 | 5.3844  | 16.8651 | 5.43138 | 1.62768  | 0.04905 | 0.85345 | <i>Gm11290</i>            | 13 |
| ENSMUSG00000022489 | 293.424 | 139.366 | 195.657 | 121.637 | 113.548 | 166.916 | 209.482 | 134.034 | 0.64248  | 0.04906 | 0.85345 | <i>Pde1b</i>              | 15 |
| ENSMUSG00000042345 | 40.7534 | 42.3749 | 33.5411 | 83.8875 | 95.1084 | 34.9986 | 38.8898 | 71.3315 | -0.87088 | 0.04931 | 0.85711 | <i>Ubash3a</i>            | 17 |
| ENSMUSG00000059654 | 4.07534 | 0.94166 | 5.59019 | 0       | 0       | 0       | 3.53573 | 0       | 4.30231  | 0.04936 | 1       | <i>Reg1</i>               | 6  |
| ENSMUSG00000106913 | 3.0565  | 0.94166 | 6.70823 | 0       | 0       | 0       | 3.5688  | 0       | 4.31429  | 0.04941 | 1       | <i>9430007M0<br/>9Rik</i> | 5  |
| ENSMUSG00000030172 | 1086.08 | 952.022 | 1090.09 | 737.161 | 885.09  | 801.378 | 1042.73 | 807.876 | 0.36781  | 0.04941 | 0.85821 | <i>Erc1</i>               | 6  |
| ENSMUSG00000050240 | 353.535 | 312.632 | 420.382 | 175.115 | 279.502 | 298.834 | 362.183 | 251.15  | 0.52611  | 0.04953 | 0.85947 | <i>Hic2</i>               | 16 |
| ENSMUSG00000026475 | 137.543 | 152.55  | 148.699 | 105.908 | 94.1379 | 106.791 | 146.264 | 102.279 | 0.51613  | 0.04965 | 0.86093 | <i>Rgs16</i>              | 1  |
| ENSMUSG00000022867 | 835.444 | 775.931 | 1170.59 | 2269.16 | 1259.7  | 822.018 | 927.32  | 1450.29 | -0.64514 | 0.04974 | 0.8618  | <i>Usp25</i>              | 16 |
| ENSMUSG00000017716 | 1107.47 | 919.064 | 1406.49 | 2134.94 | 1519.79 | 1219.57 | 1144.34 | 1624.76 | -0.50578 | 0.04979 | 0.8619  | <i>Birc5</i>              | 11 |
| ENSMUSG00000113495 | 51.9605 | 51.7915 | 45.8396 | 33.555  | 20.3804 | 30.5116 | 49.8639 | 28.149  | 0.82685  | 0.04983 | 0.8619  | <i>Gm19792</i>            | 13 |
| ENSMUSG00000091478 | 338.253 | 351.241 | 383.487 | 340.793 | 612.382 | 573.438 | 357.66  | 508.871 | -0.50963 | 0.04998 | 0.86381 | <i>Gm10039</i>            | 11 |
| ENSMUSG00000062410 | 1.01883 | 0       | 1.11804 | 5.24297 | 6.79346 | 5.3844  | 0.71229 | 5.80694 | -3.06663 | 0.04999 | 1       | <i>Hsd3b3</i>             | 3  |

---
