# Supplementary material for: SRSF1 regulates primordial follicle formation and number determination during meiotic prophase I
Source: PubMed Central journal article supplement (PMC9993595; doi:10.1186/s12915-023-01549-7), 2023-03-08
Supplement: 12915_2023_1549_MOESM3_ESM.pdf [file 12915_2023_1549_MOESM3_ESM.pdf]

**Additional file 3: Table 2. Alternative splicing events were analyzed in cKO and Ctrl ovaries.**

| GeneID             | geneSymbol       | chr | type | IncFormLen | SkipFormLen | PValue     | FDR      | IncLevel1         | IncLevel2         | IncLevelDifference |
|--------------------|------------------|-----|------|------------|-------------|------------|----------|-------------------|-------------------|--------------------|
| ENSMUSG00000049580 | <i>Tsku</i>      | 7   | SE   | 289        | 149         | 0.00012249 | 0.026162 | 1.0,0.607,1.0     | 0.673,0.0,0.34    | 0.531              |
| ENSMUSG00000048647 | <i>Exdl</i>      | 2   | SE   | 2.43E+02   | 149         | 0.00000962 | 0.003352 | 0.0,1.0,0.0       | 1.0,0.88,1.0      | -0.627             |
| ENSMUSG00000029470 | <i>P2rx4</i>     | 5   | SE   | 230        | 149         | 0.00020746 | 0.03837  | 0.841,0.802,0.83  | 1.0,1.0,0.913     | -0.147             |
| ENSMUSG00000022685 | <i>Parn</i>      | 16  | SE   | 215        | 149         | 0.00029179 | 0.048332 | 0.8,0.812,0.914   | 1.0,1.0,0.945     | -0.14              |
| ENSMUSG00000036151 | <i>Tm6sf2</i>    | 8   | SE   | 253        | 149         | 0.000033   | 0.009081 | 0.469,0.884,0.485 | 1.0,1.0,1.0       | -0.387             |
| ENSMUSG00000073968 | <i>Trim68</i>    | 7   | SE   | 172        | 149         | 0.0000317  | 0.008818 | 1.0,0.95,1.0      | 0.257,0.65,0.786  | 0.419              |
| ENSMUSG00000041536 | <i>Serpina3a</i> | 12  | SE   | 8.09E+02   | 149         | 0.0000136  | 0.004193 | 0.968,0.145,1.0   | 0.123,0.075,0.0   | 0.638              |
| ENSMUSG00000037605 | <i>Adgrl3</i>    | 5   | SE   | 353        | 149         | 0.00010204 | 0.023832 | 1.0,1.0,1.0       | 1.0,0.709,0.601   | 0.23               |
| ENSMUSG00000063889 | <i>Crem</i>      | 18  | SE   | 338        | 149         | 0.0000218  | 0.006215 | 0.665,0.428,0.829 | 0.841,1.0,1.0     | -0.306             |
| ENSMUSG00000018347 | <i>Zkscan6</i>   | 11  | SE   | 249        | 149         | 0.000042   | 0.011153 | 0.0,1.0,0.0       | 1.0,1.0,1.0       | -0.667             |
| ENSMUSG00000022305 | <i>Lrp12</i>     | 15  | SE   | 206        | 149         | 0.00000993 | 0.003382 | 0.925,1.0,1.0     | 0.52,0.897,0.542  | 0.322              |
| ENSMUSG00000035126 | <i>Wdr78</i>     | 4   | SE   | 3.01E+02   | 149         | 0.00000364 | 0.001575 | 0.856,1.0,1.0     | 0.11,0.476,0.731  | 0.513              |
| ENSMUSG00000025812 | <i>Pard3</i>     | 8   | SE   | 194        | 149         | 0.00015574 | 0.030824 | 0.339,0.277,0.0   | 0.434,0.434,1.0   | -0.417             |
| ENSMUSG00000029128 | <i>Rab28</i>     | 5   | SE   | 244        | 149         | 4.53E-08   | 7.05E-05 | 0.244,0.152,0.258 | 0.042,0.028,0.091 | 0.164              |
| ENSMUSG00000011831 | <i>Evi5</i>      | 5   | SE   | 296        | 149         | 0.0000212  | 0.006123 | 0.735,0.935,0.491 | 0.934,1.0,1.0     | -0.258             |
| ENSMUSG00000057766 | <i>Ankrd29</i>   | 18  | SE   | 248        | 149         | 4.71E-09   | 8.46E-06 | 0.231,0.546,0.419 | 0.9,1.0,1.0       | -0.568             |
| ENSMUSG00000034035 | <i>Ccdc17</i>    | 4   | SE   | 2.60E+02   | 149         | 0.00021239 | 0.038452 | 0.696,1.0,1.0     | 0.247,0.741,0.632 | 0.359              |
| ENSMUSG00000046311 | <i>Zfp62</i>     | 11  | SE   | 278        | 149         | 0.00020471 | 0.03837  | 0.255,0.172,0.251 | 0.085,0.051,0.065 | 0.159              |

|                    |                 |    |    |          |     |            |          |                   |                   |        |
|--------------------|-----------------|----|----|----------|-----|------------|----------|-------------------|-------------------|--------|
| ENSMUSG00000040003 | <i>Magi2</i>    | 5  | SE | 191      | 149 | 8.26E-07   | 0.000553 | 0.438,0.163,0.0   | 0.701,1.0,1.0     | -0.7   |
| ENSMUSG00000034354 | <i>Mtmr3</i>    | 11 | SE | 260      | 149 | 4.13E-10   | 9.64E-07 | 0.4,0.31,0.305    | 0.632,0.601,0.762 | -0.327 |
| ENSMUSG00000090841 | <i>Myl6</i>     | 10 | SE | 256      | 149 | 0.00025274 | 0.043725 | 0.259,0.162,0.0   | 0.671,1.0,0.466   | -0.572 |
| ENSMUSG00000028256 | <i>Odf2l</i>    | 3  | SE | 3.08E+02 | 149 | 0.00016681 | 0.032739 | 0.064,0.2,0.163   | 0.053,0.008,0.02  | 0.115  |
| ENSMUSG00000071562 | <i>Stfal</i>    | 16 | SE | 344      | 149 | 6.14E-07   | 0.000463 | 1.0,1.0,1.0       | 0.657,0.818,0.722 | 0.268  |
| ENSMUSG00000024381 | <i>Bin1</i>     | 18 | SE | 278      | 149 | 0.000029   | 0.00815  | 0.258,0.258,0.211 | 0.624,0.428,0.527 | -0.284 |
| ENSMUSG00000024381 | <i>Bin1</i>     | 18 | SE | 278      | 149 | 0.0000381  | 0.010215 | 0.088,0.118,0.203 | 0.315,0.331,0.325 | -0.187 |
| ENSMUSG00000035439 | <i>Haus8</i>    | 8  | SE | 215      | 149 | 1.06E-07   | 0.000142 | 0.47,0.72,0.687   | 0.964,0.883,0.91  | -0.293 |
| ENSMUSG00000029775 | <i>Klhdc10</i>  | 6  | SE | 2.36E+02 | 149 | 0.00000642 | 0.002458 | 0.219,0.075,0.117 | 1.0,0.267,0.919   | -0.592 |
| ENSMUSG00000028759 | <i>Hp1bp3</i>   | 4  | SE | 347      | 149 | 5.12E-09   | 8.55E-06 | 0.859,0.995,0.969 | 0.771,0.741,0.732 | 0.193  |
| ENSMUSG00000026991 | <i>Pkp4</i>     | 2  | SE | 278      | 149 | 0.00000234 | 0.001164 | 0.292,0.373,0.356 | 0.566,0.665,0.767 | -0.326 |
| ENSMUSG00000000673 | <i>Haa0</i>     | 17 | SE | 295      | 149 | 0.00000486 | 0.001993 | 0.288,0.562,0.144 | 0.716,1.0,1.0     | -0.574 |
| ENSMUSG00000035325 | <i>Sec31a</i>   | 5  | SE | 188      | 149 | 0.0000832  | 0.020649 | 0.959,0.978,1.0   | 0.877,0.798,0.786 | 0.159  |
| ENSMUSG00000055436 | <i>Srsf11</i>   | 3  | SE | 2.58E+02 | 149 | 1.55E-07   | 0.00019  | 1.0,1.0,0.852     | 0.719,0.366,0.188 | 0.526  |
| ENSMUSG00000039662 | <i>Icmt</i>     | 4  | SE | 258      | 149 | 0.00014066 | 0.028566 | 0.064,0.0,0.016   | 0.208,0.161,0.224 | -0.171 |
| ENSMUSG00000025237 | <i>Parp6</i>    | 9  | SE | 219      | 149 | 0.000084   | 0.020649 | 0.026,0.0,0.02    | 0.226,0.19,0.099  | -0.156 |
| ENSMUSG00000030451 | <i>Herc2</i>    | 7  | SE | 257      | 149 | 0.00007    | 0.017961 | 0.722,0.68,0.67   | 1.0,0.813,0.923   | -0.221 |
| ENSMUSG00000029456 | <i>Acad10</i>   | 5  | SE | 298      | 149 | 4.51E-07   | 0.000352 | 0.933,1.0,1.0     | 0.778,0.625,0.533 | 0.332  |
| ENSMUSG00000032178 | <i>Ilf3</i>     | 9  | SE | 1.88E+02 | 149 | 9.72E-10   | 2.06E-06 | 1.0,1.0,1.0       | 0.671,0.704,0.74  | 0.295  |
| ENSMUSG00000061306 | <i>Slc38a10</i> | 11 | SE | 267      | 149 | 6.34E-08   | 9.25E-05 | 0.751,0.817,0.668 | 0.99,0.98,0.887   | -0.207 |

|                    |                |    |    |          |     |            |          |                   |                   |        |
|--------------------|----------------|----|----|----------|-----|------------|----------|-------------------|-------------------|--------|
| ENSMUSG00000066842 | <i>Hmcn1</i>   | 1  | SE | 500      | 149 | 0.0000879  | 0.021373 | 0.145,0.266,0.1   | 0.296,0.361,0.346 | -0.164 |
| ENSMUSG00000028328 | <i>Tmod1</i>   | 4  | SE | 306      | 149 | 0.00012174 | 0.026162 | 1.0,1.0,0.898     | 0.892,0.705,0.678 | 0.208  |
| ENSMUSG00000023044 | <i>Csad</i>    | 15 | SE | 239      | 149 | 0.0000791  | 0.020072 | 1.0,1.0,1.0       | 1.0,0.757,0.63    | 0.204  |
| ENSMUSG00000023044 | <i>Csad</i>    | 15 | SE | 2.01E+02 | 149 | 0.00014332 | 0.028855 | 1.0,1.0,1.0       | 1.0,0.617,0.58    | 0.268  |
| ENSMUSG00000070371 | <i>Prss36</i>  | 7  | SE | 291      | 149 | 0.00000418 | 0.001776 | 0.719,0.869,0.738 | 0.339,0.369,0.146 | 0.491  |
| ENSMUSG00000064061 | <i>Dzip3</i>   | 16 | SE | 767      | 149 | 0.000012   | 0.003853 | 0.383,0.504,0.457 | 0.604,0.718,0.757 | -0.245 |
| ENSMUSG00000048731 | <i>Ggnbp1</i>  | 17 | SE | 239      | 149 | 0.00010583 | 0.024232 | 1.0,0.93,1.0      | 0.681,0.799,0.862 | 0.196  |
| ENSMUSG00000062115 | <i>Rail</i>    | 11 | SE | 279      | 149 | 0.0000135  | 0.004193 | 1.0,1.0,0.762     | 0.428,0.722,0.673 | 0.313  |
| ENSMUSG00000021000 | <i>Mia2</i>    | 12 | SE | 1.76E+02 | 149 | 0.00000336 | 0.001508 | 0.025,0.0,0.0     | 0.127,0.229,0.188 | -0.173 |
| ENSMUSG00000004267 | <i>Eno2</i>    | 6  | SE | 283      | 149 | 0.00010396 | 0.024039 | 0.441,0.612,0.26  | 1.0,1.0,0.798     | -0.495 |
| ENSMUSG00000052407 | <i>Ccdc171</i> | 4  | SE | 288      | 149 | 0.00010937 | 0.024799 | 1.0,1.0,1.0       | 0.608,0.564,0.627 | 0.4    |
| ENSMUSG00000043987 | <i>Cep164</i>  | 9  | SE | 296      | 149 | 0.00000671 | 0.002501 | 0.834,1.0,1.0     | 0.573,0.701,0.724 | 0.279  |
| ENSMUSG00000042772 | <i>Smg7</i>    | 1  | SE | 299      | 149 | 0.00021718 | 0.038872 | 0.088,0.065,0.163 | 0.185,0.327,0.444 | -0.213 |
| ENSMUSG00000028649 | <i>Macf1</i>   | 4  | SE | 2.51E+02 | 149 | 7.05E-07   | 0.000499 | 0.275,0.085,0.283 | 0.05,0.017,0.049  | 0.176  |
| ENSMUSG00000036860 | <i>Mrpl55</i>  | 11 | SE | 230      | 149 | 0.00015238 | 0.030417 | 0.769,0.826,0.764 | 0.942,1.0,1.0     | -0.194 |
| ENSMUSG00000025728 | <i>Pigq</i>    | 17 | SE | 261      | 149 | 7.02E-07   | 0.000499 | 0.718,0.851,0.605 | 0.975,0.946,0.984 | -0.244 |
| ENSMUSG00000025728 | <i>Pigq</i>    | 17 | SE | 361      | 149 | 0.00000139 | 0.000758 | 0.715,0.83,0.575  | 0.967,0.933,0.981 | -0.254 |
| ENSMUSG00000025728 | <i>Pigq</i>    | 17 | SE | 303      | 149 | 3.33E-07   | 0.000332 | 0.349,0.39,0.135  | 0.879,0.653,0.887 | -0.515 |
| ENSMUSG00000025728 | <i>Pigq</i>    | 17 | SE | 7.07E+02 | 149 | 0.00000117 | 0.000665 | 0.741,0.689,0.654 | 0.945,0.883,0.974 | -0.239 |
| ENSMUSG00000032182 | <i>Yipf2</i>   | 9  | SE | 210      | 149 | 0.00000089 | 0.000577 | 0.771,0.73,0.707  | 0.902,1.0,1.0     | -0.231 |

|                    |                      |    |    |          |     |            |          |                   |                   |        |
|--------------------|----------------------|----|----|----------|-----|------------|----------|-------------------|-------------------|--------|
| ENSMUSG00000031392 | <i>Irak1</i>         | X  | SE | 266      | 149 | 4.04E-10   | 9.64E-07 | 1.0,1.0,1.0       | 0.528,0.528,0.296 | 0.549  |
| ENSMUSG00000027263 | <i>Tubgcp4</i>       | 2  | SE | 274      | 149 | 0.00011796 | 0.026162 | 0.768,0.605,0.826 | 1.0,1.0,0.839     | -0.213 |
| ENSMUSG00000036196 | <i>Slc26a8</i>       | 17 | SE | 345      | 149 | 0.00021804 | 0.038872 | 1.0,1.0,1.0       | 1.0,0.665,0.647   | 0.229  |
| ENSMUSG00000005225 | <i>Plekha8</i>       | 6  | SE | 3.05E+02 | 149 | 1.81E-07   | 0.000211 | 0.781,0.796,0.729 | 1.0,1.0,1.0       | -0.231 |
| ENSMUSG00000019841 | <i>Rev3l</i>         | 10 | SE | 276      | 149 | 0.0000369  | 0.010012 | 0.33,0.21,0.365   | 0.018,0.143,0.197 | 0.182  |
| ENSMUSG00000020513 | <i>Tubd1</i>         | 11 | SE | 242      | 149 | 0.00025077 | 0.043725 | 0.025,0.0,0.055   | 0.381,0.159,0.133 | -0.198 |
| ENSMUSG00000056458 | <i>Mok</i>           | 12 | SE | 323      | 149 | 0.00000182 | 0.000946 | 0.958,0.806,1.0   | 0.495,0.217,0.609 | 0.481  |
| ENSMUSG00000006673 | <i>Qrich1</i>        | 9  | SE | 209      | 149 | 0.0001981  | 0.037688 | 1.0,1.0,0.829     | 0.72,0.588,0.695  | 0.275  |
| ENSMUSG00000021832 | <i>Psmc6</i>         | 14 | SE | 3.05E+02 | 149 | 6.66E-16   | 7.78E-12 | 0.328,0.0,0.163   | 1.0,1.0,1.0       | -0.836 |
| ENSMUSG00000039361 | <i>Picalm</i>        | 7  | SE | 299      | 149 | 0.0000922  | 0.021965 | 0.164,0.253,0.313 | 0.542,0.419,0.384 | -0.205 |
| ENSMUSG00000027680 | <i>Fxr1</i>          | 3  | SE | 230      | 149 | 0.0000921  | 0.021965 | 0.179,0.116,0.165 | 0.011,0.035,0.081 | 0.111  |
| ENSMUSG00000003435 | <i>Supt5</i>         | 7  | SE | 161      | 149 | 0.00000115 | 0.000665 | 0.0,0.0,0.108     | 0.467,0.195,0.229 | -0.261 |
| ENSMUSG00000053390 | <i>Zfp952</i>        | 17 | SE | 259      | 149 | 0.00020865 | 0.03837  | 0.418,0.379,0.535 | 0.076,0.161,0.079 | 0.339  |
| ENSMUSG00000006527 | <i>Sfmbt1</i>        | 14 | SE | 2.41E+02 | 149 | 0.000015   | 0.004493 | 0.883,0.812,1.0   | 0.464,0.284,0.684 | 0.421  |
| ENSMUSG00000027605 | <i>Acss2</i>         | 2  | SE | 188      | 149 | 4.53E-07   | 0.000352 | 0.32,0.186,0.268  | 0.105,0.097,0.029 | 0.181  |
| ENSMUSG00000097080 | <i>1700086O06Rik</i> | 18 | SE | 328      | 149 | 1.99E-14   | 1.32E-10 | 0.45,0.132,0.312  | 1.0,1.0,1.0       | -0.702 |
| ENSMUSG00000097080 | <i>1700086O06Rik</i> | 18 | SE | 264      | 149 | 0          | 0        | 0.0,0.22,0.0      | 1.0,1.0,1.0       | -0.927 |
| ENSMUSG00000028689 | <i>Ccdc163</i>       | 4  | SE | 183      | 149 | 0.0000064  | 0.002458 | 1.0,1.0,1.0       | 0.808,0.765,0.62  | 0.269  |
| ENSMUSG00000051285 | <i>Pcmt1</i>         | 1  | SE | 3.41E+02 | 149 | 0.0000117  | 0.003781 | 0.29,0.274,0.106  | 0.052,0.0,0.051   | 0.189  |
| ENSMUSG00000022791 | <i>Tnk2</i>          | 16 | SE | 245      | 149 | 0.00000104 | 0.000622 | 1.0,1.0,0.966     | 0.924,0.856,0.76  | 0.142  |

|                     |                 |    |    |          |     |            |          |                   |                   |        |
|---------------------|-----------------|----|----|----------|-----|------------|----------|-------------------|-------------------|--------|
| ENSMUSG00000031948  | <i>Kars</i>     | 8  | SE | 207      | 149 | 0.00025101 | 0.043725 | 0.0,0.057,0.0     | 0.216,0.141,0.11  | -0.137 |
| ENSMUSG00000033486  | <i>Catsper2</i> | 2  | SE | 249      | 149 | 0.00013721 | 0.028111 | 1.0,0.807,0.952   | 0.705,0.677,0.732 | 0.215  |
| ENSMUSG00000074247  | <i>Dda1</i>     | 8  | SE | 201      | 149 | 0.00012434 | 0.026162 | 0.969,0.966,1.0   | 0.862,0.828,0.869 | 0.125  |
| ENSMUSG00000023286  | <i>Ube2j2</i>   | 4  | SE | 3.12E+02 | 149 | 0.00000813 | 0.00292  | 0.284,0.362,0.398 | 1.0,0.642,0.607   | -0.402 |
| ENSMUSG00000016200  | <i>Syt14</i>    | 1  | SE | 1541     | 149 | 8.29E-07   | 0.000553 | 0.583,0.441,0.768 | 0.088,0.244,0.132 | 0.443  |
| ENSMUSG00000010592  | <i>Dazl</i>     | 17 | SE | 200      | 149 | 2.26E-14   | 1.32E-10 | 0.784,0.845,0.814 | 0.965,0.974,0.973 | -0.156 |
| ENSMUSG00000085601  | <i>Gm4969</i>   | 7  | SE | 256      | 149 | 0.0000108  | 0.003543 | 0.957,0.954,0.936 | 0.862,0.73,0.835  | 0.14   |
| ENSMUSG000000109032 | <i>Gm7972</i>   | 9  | SE | 325      | 149 | 0.00011942 | 0.026162 | 0.88,0.93,0.818   | 1.0,0.981,1.0     | -0.118 |
| ENSMUSG000000109032 | <i>Gm7972</i>   | 9  | SE | 2.34E+02 | 149 | 0.00000355 | 0.001563 | 0.641,0.858,0.609 | 1.0,0.905,1.0     | -0.266 |
| ENSMUSG000000109032 | <i>Gm7972</i>   | 9  | SE | 234      | 149 | 0.00000036 | 0.000336 | 0.734,0.723,0.736 | 0.448,0.427,0.411 | 0.302  |
| ENSMUSG00000033287  | <i>Kctd17</i>   | 15 | SE | 237      | 149 | 0.00000011 | 0.000142 | 0.112,0.218,0.284 | 0.0,0.0,0.0       | 0.205  |
| ENSMUSG00000017718  | <i>Afmid</i>    | 11 | SE | 240      | 149 | 0.00012266 | 0.026162 | 1.0,1.0,1.0       | 0.713,0.7,0.0     | 0.529  |
| ENSMUSG00000020461  | <i>Clhc1</i>    | 11 | SE | 256      | 149 | 9.72E-07   | 0.000598 | 0.461,1.0,0.951   | 0.0,0.0,0.368     | 0.681  |
| ENSMUSG00000040097  | <i>Flywch1</i>  | 17 | SE | 2.47E+02 | 149 | 0.00019849 | 0.037688 | 0.424,0.63,1.0    | 0.194,0.105,0.245 | 0.503  |
| ENSMUSG00000027198  | <i>Ext2</i>     | 2  | SE | 221      | 149 | 0.00011354 | 0.025498 | 0.447,0.574,0.752 | 1.0,1.0,0.752     | -0.326 |
| ENSMUSG00000064326  | <i>Siva1</i>    | 12 | SE | 344      | 149 | 0.00000999 | 0.003382 | 0.829,0.868,0.791 | 0.925,0.938,0.957 | -0.111 |
| ENSMUSG00000000915  | <i>Hip1r</i>    | 5  | SE | 248      | 149 | 0.00017206 | 0.033486 | 0.445,0.678,0.546 | 1.0,0.546,1.0     | -0.292 |
| ENSMUSG00000074219  | <i>Gm10644</i>  | 8  | SE | 257      | 149 | 0.0000561  | 0.014546 | 0.777,1.0,1.0     | 0.367,0.465,0.367 | 0.526  |
| ENSMUSG00000023927  | <i>Satb1</i>    | 17 | SE | 2.45E+02 | 149 | 0.00000515 | 0.002037 | 0.0,0.0,0.08      | 1.0,1.0,0.255     | -0.725 |
| ENSMUSG00000031808  | <i>Slc27a1</i>  | 8  | SE | 240      | 149 | 0.00000335 | 0.001508 | 0.0,0.0,0.16      | 0.498,0.461,0.262 | -0.354 |

|                    |                      |    |    |          |     |            |          |                   |                   |        |
|--------------------|----------------------|----|----|----------|-----|------------|----------|-------------------|-------------------|--------|
| ENSMUSG00000037818 | <i>Abhd18</i>        | 3  | SE | 201      | 149 | 0.0000133  | 0.004193 | 0.503,0.076,0.4   | 0.0,0.0,0.096     | 0.294  |
| ENSMUSG00000022789 | <i>Dnm1l</i>         | 16 | SE | 227      | 149 | 4.42E-07   | 0.000352 | 0.198,0.332,0.247 | 0.644,0.524,0.557 | -0.316 |
| ENSMUSG00000014592 | <i>Camta1</i>        | 4  | SE | 170      | 149 | 0.0000148  | 0.004493 | 0.063,0.0,0.0     | 0.763,0.539,0.127 | -0.455 |
| ENSMUSG00000027806 | <i>Tsc22d2</i>       | 3  | SE | 3.08E+02 | 149 | 0.00026261 | 0.044769 | 0.0,1.0,0.0       | 0.53,1.0,1.0      | -0.51  |
| ENSMUSG00000031004 | <i>Mki67</i>         | 7  | SE | 275      | 149 | 9.1E-11    | 3.04E-07 | 0.921,1.0,1.0     | 0.659,0.52,0.575  | 0.389  |
| ENSMUSG00000031004 | <i>Mki67</i>         | 7  | SE | 1109     | 149 | 3.52E-09   | 6.85E-06 | 0.962,1.0,1.0     | 0.72,0.749,0.747  | 0.249  |
| ENSMUSG00000039531 | <i>Zup1</i>          | 10 | SE | 284      | 149 | 4.03E-07   | 0.000349 | 0.636,0.63,0.638  | 0.197,0.344,0.112 | 0.417  |
| ENSMUSG00000051592 | <i>Ccnb3</i>         | X  | SE | 305      | 149 | 0.00000291 | 0.001361 | 1.0,1.0,0.898     | 0.746,0.612,0.71  | 0.277  |
| ENSMUSG00000051592 | <i>Ccnb3</i>         | X  | SE | 1.90E+02 | 149 | 0.0002069  | 0.03837  | 0.758,1.0,1.0     | 1.0,0.381,0.641   | 0.245  |
| ENSMUSG00000030041 | <i>Mlap</i>          | 6  | SE | 290      | 149 | 0.00000209 | 0.001063 | 0.731,0.73,0.795  | 0.85,0.862,0.968  | -0.141 |
| ENSMUSG00000025372 | <i>Baiap2</i>        | 11 | SE | 197      | 149 | 0.00000122 | 0.000678 | 0.327,0.204,0.385 | 0.0,0.076,0.064   | 0.259  |
| ENSMUSG00000055447 | <i>Cd47</i>          | 16 | SE | 212      | 149 | 0.00000504 | 0.002028 | 0.115,0.142,0.123 | 0.274,0.35,0.5    | -0.248 |
| ENSMUSG00000007411 | <i>Mark3</i>         | 12 | SE | 194      | 149 | 0.0002235  | 0.039545 | 0.86,0.75,0.876   | 0.469,0.647,0.628 | 0.247  |
| ENSMUSG00000032582 | <i>Rbm6</i>          | 9  | SE | 2.56E+02 | 149 | 0.00000675 | 0.002501 | 0.44,0.196,0.636  | 0.0,0.0,0.115     | 0.386  |
| ENSMUSG00000059939 | <i>9430015G10Rik</i> | 4  | SE | 245      | 149 | 0.00000168 | 0.000891 | 0.633,0.796,0.753 | 1.0,1.0,0.935     | -0.251 |
| ENSMUSG00000094152 | <i>Slc6a16</i>       | 7  | SE | 391      | 149 | 2.74E-07   | 0.000291 | 0.807,1.0,1.0     | 0.0,0.276,0.433   | 0.699  |
| ENSMUSG00000030323 | <i>Ift122</i>        | 6  | SE | 326      | 149 | 0.00000242 | 0.001178 | 0.014,0.037,0.0   | 0.291,0.109,0.171 | -0.173 |
| ENSMUSG00000038145 | <i>Snrk</i>          | 9  | SE | 199      | 149 | 0.0002774  | 0.046609 | 0.428,0.2,0.13    | 1.0,0.428,1.0     | -0.557 |
| ENSMUSG00000026987 | <i>Baz2b</i>         | 2  | SE | 3.38E+02 | 149 | 0.0000104  | 0.003471 | 0.907,1.0,1.0     | 0.869,0.569,0.332 | 0.379  |
| ENSMUSG00000009628 | <i>Tex15</i>         | 8  | SE | 254      | 149 | 9.7E-12    | 3.78E-08 | 0.0,0.0,0.0       | 1.0,1.0,0.524     | -0.841 |

|                    |                      |    |    |          |     |            |          |                   |                   |        |
|--------------------|----------------------|----|----|----------|-----|------------|----------|-------------------|-------------------|--------|
| ENSMUSG00000072964 | <i>Bhlhb9</i>        | X  | SE | 211      | 149 | 0.0000045  | 0.001877 | 1.0,1.0,0.809     | 0.0,0.261,0.653   | 0.632  |
| ENSMUSG00000027722 | <i>Spata5</i>        | 3  | SE | 186      | 149 | 6.62E-12   | 3.09E-08 | 0.24,0.348,0.385  | 0.14,0.079,0.091  | 0.221  |
| ENSMUSG00000046774 | <i>8030474K03Rik</i> | X  | SE | 204      | 149 | 0.0000443  | 0.011623 | 0.982,1.0,0.967   | 0.836,0.745,0.827 | 0.18   |
| ENSMUSG00000023088 | <i>Abcc1</i>         | 16 | SE | 3.42E+02 | 149 | 0.000016   | 0.004724 | 0.232,0.195,0.127 | 0.545,0.813,0.623 | -0.476 |
| ENSMUSG00000042515 | <i>Mum111</i>        | X  | SE | 217      | 149 | 0.0002104  | 0.03839  | 1.0,0.878,1.0     | 0.507,0.706,0.768 | 0.299  |
| ENSMUSG00000027523 | <i>Gnas</i>          | 2  | SE | 244      | 149 | 0.00012817 | 0.026654 | 0.0,1.0,1.0       | 0.0,1.0,0.0       | 0.333  |
| ENSMUSG00000032621 | <i>Srek1</i>         | 13 | SE | 273      | 149 | 0.00027468 | 0.046487 | 0.645,0.401,0.621 | 0.136,0.274,0.329 | 0.309  |
| ENSMUSG00000034940 | <i>Synrg</i>         | 11 | SE | 452      | 149 | 0.00012415 | 0.026162 | 1.0,1.0,1.0       | 0.676,0.761,0.737 | 0.275  |
| ENSMUSG00000021276 | <i>Cinp</i>          | 12 | SE | 2.99E+02 | 149 | 0.00012896 | 0.026654 | 0.0,0.199,1.0     | 1.0,0.499,1.0     | -0.433 |
| ENSMUSG00000014444 | <i>Piezo1</i>        | 8  | SE | 211      | 149 | 0.0000204  | 0.005955 | 0.927,0.886,0.85  | 0.493,0.55,0.526  | 0.365  |
| ENSMUSG00000020439 | <i>Smtn</i>          | 11 | SE | 200      | 149 | 0.0000816  | 0.020483 | 0.0,0.0,0.271     | 0.246,0.211,0.19  | -0.125 |
| ENSMUSG00000039585 | <i>Myo9a</i>         | 9  | SE | 206      | 149 | 9.63E-07   | 0.000598 | 0.375,0.367,0.116 | 0.566,1.0,0.943   | -0.55  |
| ENSMUSG00000023882 | <i>Zfp54</i>         | 17 | SE | 189      | 149 | 1.62E-10   | 4.74E-07 | 0.0,0.0,0.0       | 1.0,0.825,1.0     | -0.942 |
| ENSMUSG00000019791 | <i>Hint3</i>         | 10 | SE | 2.44E+02 | 149 | 0.00028716 | 0.047905 | 0.147,0.083,0.219 | 0.0,0.013,0.03    | 0.135  |
| ENSMUSG00000026074 | <i>Map4k4</i>        | 1  | SE | 311      | 149 | 0.00000706 | 0.002577 | 0.166,0.125,0.156 | 0.313,0.494,0.428 | -0.263 |
| ENSMUSG00000053333 | <i>Dis3l2</i>        | 1  | SE | 227      | 149 | 0.00000903 | 0.003195 | 0.522,0.451,1.0   | 0.0,0.0,0.0       | 0.658  |
| ENSMUSG00000036333 | <i>Kidins220</i>     | 12 | SE | 263      | 149 | 0.00018414 | 0.035542 | 0.831,0.633,0.737 | 0.503,0.489,0.492 | 0.239  |
| ENSMUSG00000028073 | <i>Pear1</i>         | 3  | SE | 283      | 149 | 0.00025681 | 0.044101 | 1.0,1.0,1.0       | 0.648,0.612,0.612 | 0.376  |
| ENSMUSG00000048440 | <i>Cyp4f16</i>       | 17 | SE | 2.94E+02 | 149 | 3.41E-07   | 0.000332 | 0.797,0.695,0.736 | 1.0,1.0,1.0       | -0.257 |
| ENSMUSG00000048440 | <i>Cyp4f16</i>       | 17 | SE | 203      | 149 | 3.88E-07   | 0.000348 | 0.72,0.68,0.786   | 1.0,1.0,1.0       | -0.271 |

|                     |                      |    |      |     |     |            |          |                   |                   |        |
|---------------------|----------------------|----|------|-----|-----|------------|----------|-------------------|-------------------|--------|
| ENSMUSG00000042787  | <i>Exog</i>          | 9  | SE   | 263 | 149 | 2.57E-07   | 0.000286 | 0.288,0.274,0.298 | 0.739,1.0,0.819   | -0.566 |
| ENSMUSG00000029635  | <i>Cdk8</i>          | 5  | SE   | 278 | 149 | 0.0000934  | 0.022036 | 0.882,0.855,0.771 | 0.673,0.514,0.619 | 0.234  |
| ENSMUSG00000009995  | <i>Taz</i>           | X  | SE   | 240 | 149 | 0.00000261 | 0.001243 | 0.027,0.0,0.055   | 0.156,0.145,0.284 | -0.168 |
| ENSMUSG000000085396 | <i>Firre</i>         | X  | A3SS | 208 | 149 | 3.07E-12   | 5.53E-09 | 0.968,1.0,1.0     | 0.448,0.662,0.518 | 0.447  |
| ENSMUSG000000019178 | <i>Styx11</i>        | 5  | A3SS | 152 | 149 | 1.81E-06   | 0.001305 | 0.898,1.0,1.0     | 0.797,0.729,0.512 | 0.287  |
| ENSMUSG000000026090 | <i>2010300C02Rik</i> | 1  | A3SS | 152 | 149 | 2.20E-05   | 0.008812 | 0.0,0.0,0.329     | 0.164,1.0,1.0     | -0.612 |
| ENSMUSG000000039637 | <i>Coro7</i>         | 16 | A3SS | 171 | 149 | 6.39E-07   | 0.000577 | 0.0,0.635,0.0     | 1.0,0.685,1.0     | -0.683 |
| ENSMUSG000000030774 | <i>Pak1</i>          | 7  | A3SS | 152 | 149 | 0.00011969 | 0.04322  | 0.495,1.0,1.0     | 0.376,0.404,0.949 | 0.255  |
| ENSMUSG000000010453 | <i>Kansl3</i>        | 1  | A3SS | 161 | 149 | 0          | 0        | 1.0,1.0,1.0       | 0.0,0.236,0.316   | 0.816  |
| ENSMUSG000000020131 | <i>Pcsk4</i>         | 10 | A3SS | 179 | 149 | 1.56E-05   | 0.00705  | 0.555,0.543,0.806 | 1.0,1.0,0.934     | -0.343 |
| ENSMUSG000000084128 | <i>Esrp2</i>         | 8  | A3SS | 152 | 149 | 3.97E-08   | 4.78E-05 | 1.0,1.0,1.0       | 0.246,0.574,0.0   | 0.727  |
| ENSMUSG000000112023 | <i>Lilr4b</i>        | 10 | A3SS | 646 | 149 | 3.49E-06   | 0.001799 | 0.187,0.0,0.316   | 0.698,1.0,1.0     | -0.732 |
| ENSMUSG000000110393 | <i>Gm36445</i>       | 13 | A3SS | 348 | 149 | 2.41E-06   | 0.001453 | 0.0,0.0,0.125     | 1.0,0.485,0.692   | -0.684 |
| ENSMUSG000000041459 | <i>Tardbp</i>        | 4  | A5SS | 158 | 149 | 6.46E-05   | 1.64E-02 | 0.663,0.705,0.361 | 0.9,0.845,1.0     | -0.339 |
| ENSMUSG000000023393 | <i>Slc17a9</i>       | 2  | A5SS | 219 | 149 | 1.00E-08   | 1.45E-05 | 1.0,0.803,1.0     | 0.576,0.0,0.0     | 0.742  |
| ENSMUSG000000026107 | <i>Nabp1</i>         | 1  | A5SS | 728 | 149 | 1.98E-04   | 0.040884 | 0.954,0.799,0.938 | 0.808,0.545,0.633 | 0.235  |
| ENSMUSG000000026107 | <i>Nabp1</i>         | 1  | A5SS | 625 | 149 | 7.13E-05   | 0.016375 | 0.966,0.849,0.952 | 0.84,0.578,0.682  | 0.222  |
| ENSMUSG000000038412 | <i>Higd1a</i>        | 9  | A5SS | 161 | 149 | 1.9692E-05 | 0.007822 | 0.066,0.481,0.799 | 1.0,1.0,1.0       | -0.551 |
| ENSMUSG00000007035  | <i>Msh5</i>          | 17 | A5SS | 184 | 149 | 2.2718E-05 | 0.007822 | 0.703,0.589,0.741 | 0.939,0.89,0.932  | -0.243 |
| ENSMUSG000000074247 | <i>Ddal</i>          | 8  | A5SS | 278 | 149 | 1.01E-05   | 0.0052   | 0.941,0.944,1.0   | 0.802,0.748,0.801 | 0.178  |



|                    |                      |    |      |          |     |            |          |                   |                   |        |
|--------------------|----------------------|----|------|----------|-----|------------|----------|-------------------|-------------------|--------|
| ENSMUSG00000085024 | <i>C230035116Rik</i> | 13 | A5SS | 242      | 149 | 3.26E-07   | 2.24E-04 | 0.804,0.939,0.812 | 0.396,0.235,0.335 | 0.53   |
| ENSMUSG00000024293 | <i>Escol</i>         | 18 | A5SS | 2079     | 149 | 3.93E-05   | 0.011603 | 0.722,0.875,0.89  | 0.93,1.0,1.0      | -0.148 |
| ENSMUSG00000015957 | <i>Wnt11</i>         | 7  | A5SS | 313      | 149 | 1.40E-08   | 1.45E-05 | 1.0,1.0,1.0       | 0.749,0.67,0.826  | 0.252  |
| ENSMUSG00000040434 | <i>Large2</i>        | 2  | MEX  | 254      | 262 | 5.28E-08   | 8.41E-05 | 0.0,0.0,0.079     | 0.549,0.256,0.307 | -0.344 |
| ENSMUSG00000038371 | <i>Sbf2</i>          | 7  | MEX  | 238      | 287 | 5.94E-05   | 0.01253  | 0.317,0.598,0.633 | 0.153,0.097,0.156 | 0.381  |
| ENSMUSG00000038766 | <i>Gabpb2</i>        | 3  | MEX  | 204      | 246 | 0.00017734 | 0.027428 | 0.099,0.376,0.0   | 0.668,0.437,0.311 | -0.314 |
| ENSMUSG00000024381 | <i>Bin1</i>          | 18 | MEX  | 278      | 221 | 5.65E-05   | 0.01253  | 0.09,0.143,0.169  | 0.43,0.266,0.34   | -0.211 |
| ENSMUSG00000001419 | <i>Mef2d</i>         | 3  | MEX  | 287      | 284 | 0.00011477 | 0.019019 | 0.915,0.733,0.84  | 0.965,1.0,0.967   | -0.148 |
| ENSMUSG00000025968 | <i>Ndufs1</i>        | 1  | MEX  | 257      | 226 | 5.04E-05   | 0.01253  | 0.582,0.549,0.687 | 0.417,0.418,0.371 | 0.204  |
| ENSMUSG00000021098 | <i>4930447C04Rik</i> | 12 | MEX  | 288      | 207 | 0.00011392 | 0.019019 | 0.399,0.439,0.369 | 0.556,0.53,0.532  | -0.137 |
| ENSMUSG00000024726 | <i>Carnmt1</i>       | 19 | MEX  | 328      | 263 | 6.86E-05   | 0.013256 | 0.394,0.902,0.8   | 0.15,0.271,0.231  | 0.481  |
| ENSMUSG00000020672 | <i>Sntg2</i>         | 12 | MEX  | 277      | 279 | 1.43E-05   | 0.004405 | 0.0,0.168,0.0     | 0.668,0.751,0.335 | -0.529 |
| ENSMUSG00000025964 | <i>Adam23</i>        | 1  | MEX  | 240      | 240 | 1.52E-05   | 0.004405 | 0.2,0.0,0.0       | 0.714,0.375,0.5   | -0.463 |
| ENSMUSG00000022789 | <i>Dnm1l</i>         | 16 | MEX  | 227      | 182 | 1.01E-05   | 0.003894 | 0.327,0.431,0.354 | 0.742,0.696,0.545 | -0.29  |
| ENSMUSG00000094724 | <i>Rnaset2b</i>      | 17 | MEX  | 202      | 207 | 9.07E-07   | 0.000526 | 0.924,0.612,1.0   | 0.328,0.307,0.543 | 0.453  |
| ENSMUSG00000030495 | <i>Slc7a10</i>       | 7  | MEX  | 246      | 299 | 7.25E-08   | 8.41E-05 | 0.0,0.342,0.288   | 0.829,1.0,1.0     | -0.733 |
| ENSMUSG00000030759 | <i>Far1</i>          | 7  | MEX  | 321      | 321 | 1.39E-06   | 0.000644 | 0.621,0.82,0.614  | 0.935,0.931,0.884 | -0.232 |
| ENSMUSG00000009995 | <i>Taz</i>           | X  | MEX  | 202      | 240 | 5.06E-07   | 0.000392 | 0.978,1.0,0.955   | 0.834,0.873,0.717 | 0.17   |
| ENSMUSG00000023393 | <i>Slc17a9</i>       | 2  | RI   | 574      | 149 | 0.00011125 | 0.033899 | 1.0,0.645,1.0     | 0.493,0.206,0.661 | 0.428  |
| ENSMUSG00000026107 | <i>Nabpl</i>         | 1  | RI   | 8.33E+02 | 149 | 0.00024484 | 0.049735 | 0.953,0.79,0.94   | 0.811,0.566,0.628 | 0.226  |

|                    |                 |    |    |          |     |            |          |                   |                   |        |
|--------------------|-----------------|----|----|----------|-----|------------|----------|-------------------|-------------------|--------|
| ENSMUSG00000035875 | <i>All82371</i> | 2  | RI | 416      | 149 | 0.00011039 | 0.033899 | 0.038,0.0,0.021   | 0.741,0.589,0.152 | -0.474 |
| ENSMUSG00000025237 | <i>Parp6</i>    | 9  | RI | 793      | 149 | 3.3862E-14 | 1.03E-10 | 1.0,1.0,1.0       | 0.33,0.375,0.554  | 0.58   |
| ENSMUSG00000056962 | <i>Jmjd6</i>    | 11 | RI | 670      | 149 | 0.0001075  | 0.033899 | 0.97,1.0,0.912    | 0.788,0.552,0.88  | 0.221  |
| ENSMUSG00000000915 | <i>Hip1r</i>    | 5  | RI | 580      | 149 | 1.399E-05  | 0.007104 | 0.435,0.673,0.339 | 1.0,0.673,1.0     | -0.409 |
| ENSMUSG00000004266 | <i>Ptpn6</i>    | 6  | RI | 3.20E+02 | 149 | 0.0002319  | 0.049735 | 0.344,0.449,0.651 | 0.055,0.162,0.032 | 0.398  |
| ENSMUSG00000020692 | <i>Nle1</i>     | 11 | RI | 1105     | 149 | 2.5509E-05 | 0.011104 | 0.702,0.859,0.69  | 0.288,0.327,0.283 | 0.451  |
| ENSMUSG00000024403 | <i>Atp6v1g2</i> | 17 | RI | 556      | 149 | 1.1675E-05 | 0.007104 | 1.0,0.931,1.0     | 0.287,0.493,0.898 | 0.418  |
| ENSMUSG00000011832 | <i>Evi5l</i>    | 8  | RI | 229      | 149 | 0.00022927 | 0.049735 | 0.066,0.075,0.061 | 0.256,0.188,0.249 | -0.164 |
| ENSMUSG00000015880 | <i>Ncapg</i>    | 5  | RI | 1479     | 149 | 3.7788E-06 | 0.002879 | 0.194,0.084,0.172 | 0.015,0.049,0.032 | 0.118  |
| ENSMUSG00000038781 | <i>Stap2</i>    | 17 | RI | 4.35E+02 | 149 | 0.00022295 | 0.049735 | 0.124,0.0,0.0     | 0.181,0.327,0.32  | -0.235 |
| ENSMUSG00000026170 | <i>Cyp27a1</i>  | 1  | RI | 261      | 149 | 0.00020156 | 0.049735 | 0.533,0.65,0.727  | 1.0,1.0,1.0       | -0.363 |
| ENSMUSG00000062647 | <i>Rpl7a</i>    | 2  | RI | 335      | 149 | 2.4985E-06 | 0.002538 | 1.0,1.0,0.18      | 0.185,0.098,0.092 | 0.602  |
| ENSMUSG00000047534 | <i>Mis18bp1</i> | 12 | RI | 1124     | 149 | 4.5186E-12 | 6.88E-09 | 0.603,0.642,0.581 | 0.141,0.223,0.264 | 0.399  |

---
