# Supplementary material for: SRSF1 regulates primordial follicle formation and number determination during meiotic prophase I
Source: PubMed Central journal article supplement (PMC9993595; doi:10.1186/s12915-023-01549-7), 2023-03-08

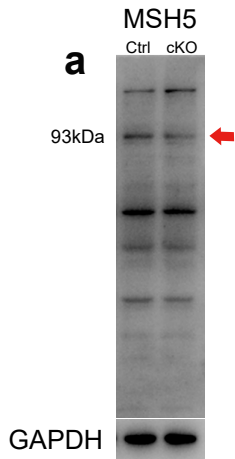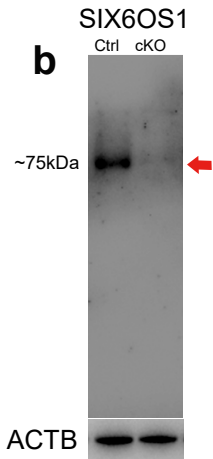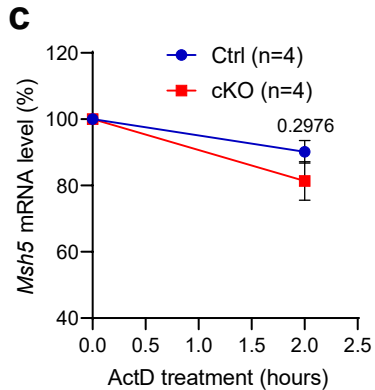

Supplement: 12915_2023_1549_MOESM4_ESM.pdf [file 12915_2023_1549_MOESM4_ESM.pdf]
