# Supplementary material for: SRSF1 regulates primordial follicle formation and number determination during meiotic prophase I
Source: PubMed Central journal article supplement (PMC9993595; doi:10.1186/s12915-023-01549-7), 2023-03-08
Supplement: 12915_2023_1549_MOESM6_ESM.pdf [file 12915_2023_1549_MOESM6_ESM.pdf]

Additional file 6: Table 3. Primer sequences are used in this study.

| Target                  | Sequence(5' to 3')        | Application        |
|-------------------------|---------------------------|--------------------|
| <i>Srsfl</i> -GT-F      | ACTAATGTGGGAAGAATGGC      | Genotyping         |
| <i>Srsfl</i> -GT-FKO    | TTCGCCTTCGTTGAGTTC        |                    |
| <i>Srsfl</i> -GT-R      | AAACTATTGCTCCCATCTGC      |                    |
| <i>Stra8-GFPcre</i> -F  | ACTCCAAGCACTGGGCAGAA      |                    |
| <i>Stra8-GFPcre</i> -R1 | GCCACCATAGCAGCATCAA       |                    |
| <i>Stra8-GFPcre</i> -R2 | CGTTTACGTCGCCGTCCAG       |                    |
| <i>Srsfl</i> -F         | AGGAGGATTGAGGAGGATCAG     | RT-qPCR            |
| <i>Srsfl</i> -R         | CGCTCCATGAATCCTGGTAA      |                    |
| <i>Gapdh</i> -F         | GGGTCCCAGCTTAGGTTTCAT     |                    |
| <i>Gapdh</i> -R         | CCCAATACGGCCAAATCCGT      |                    |
| <i>Vasa</i> -F          | GCCGTGGAGGATTTGGTCTA      |                    |
| <i>Vasa</i> -R          | AAGTGTCAACCATTGCCTGAAT    |                    |
| <i>Jagged1</i> -F       | CCTGCGAGCCAAGGTGTG        |                    |
| <i>Jagged1</i> -R       | CTCCACCACAACAGTTCCCA      |                    |
| <i>Kit</i> -F           | GGAGTGTAAGGCCTCCAACG      |                    |
| <i>Kit</i> -R           | GGCCTGGATTTGCTCTTTGTT     |                    |
| <i>Rac1</i> -F          | CAAAGACAAGCCGATTGCCG      |                    |
| <i>Rac1</i> -R          | TCGCACTTCAGGATACCACTTT    |                    |
| <i>Figla</i> -F         | AGCGAAGGTCTCAGAGAAACAA    |                    |
| <i>Figla</i> -R         | AGCTGGTAGGTTGGGTAGCA      |                    |
| <i>Lhx8</i> -F          | GACAAATACCTCCTCAAGGTGAA   |                    |
| <i>Lhx8</i> -R          | CGAGTGGATGTGCCTGCC        |                    |
| <i>Nobox</i> -F         | TGGGGCACTAGTATCGCCT       |                    |
| <i>Nobox</i> -R         | GGAGAGCTGGAATGAACCCA      |                    |
| <i>Sohlh1</i> -F        | ATTACGGGATGCAGCAAGAC      |                    |
| <i>Sohlh1</i> -R        | GCTGACCACGTTTCTCCGAA      |                    |
| <i>Rec8</i> -F          | CAGCGGAGAGCTTCACTACC      |                    |
| <i>Rec8</i> -R          | TTGTATCCCTTCCACCTGCG      |                    |
| <i>Rad21l</i> -F        | ATATTTTCGGAGCCCTTGCTC     |                    |
| <i>Rad21l</i> -R        | TCAGGTTTCATCCCCAAAGCTC    |                    |
| <i>Hormad1</i> -F       | GGAGCTTCTGAAATCAAAGAACCAA |                    |
| <i>Hormad1</i> -R       | TTTTTCCGCTTCTTGTTTTGCT    |                    |
| <i>Hormad2</i> -F       | GTGGGTTCTGGGGTCTTCAA      |                    |
| <i>Hormad2</i> -R       | TTTCAACAATTCCAACCTGAAGC   |                    |
| <i>Syce1</i> -F         | CAGAAACGGCAGAGGCTGAA      |                    |
| <i>Syce1</i> -R         | TTAGGTCCTGCTTGATGGGC      |                    |
| <i>Syce2</i> -F         | GCGCCTCCCCTGGAGTTA        |                    |
| <i>Syce2</i> -R         | CTGGCAACTGGCACTCGG        |                    |
| <i>Syp1</i> -F          | TGCCAAAAGCATTTTACCTACAACA |                    |
| <i>Syp1</i> -R          | TTCCTCTGAAACCAGGCTCAAG    |                    |
| <i>Syp3</i> -F          | GCGTTCAGCCAATCAGCAG       |                    |
| <i>Syp3</i> -R          | TCTTTAGATGTTTGCTCAGCGG    |                    |
| <i>Psmc3ip</i> -F       | TTTATTTTGGCCGATCAGAACCAGT |                    |
| <i>Psmc3ip</i> -R       | TTTCTGCATCTCAGGAGTGGTC    |                    |
| <i>Tdrd9</i> -F         | TGTGTGATGGGCCAAATGGA      |                    |
| <i>Tdrd9</i> -R         | TCAACCGACAGAACAAGCCTA     |                    |
| <i>Plk1</i> -F          | CCCACCATTACGAGTTGCT       |                    |
| <i>Plk1</i> -R          | GGGGGTTCTCCACACCTTTATT    |                    |
| <i>Atm</i> -F           | GTGTGATTTTTCAGGGGATTTGG   |                    |
| <i>Atm</i> -R           | TTGTCTCAGCTGCTTGTTAC      |                    |
| <i>Dmc1</i> -F          | GGCTGAACGCCAGCAAAAAT      |                    |
| <i>Dmc1</i> -R          | GGGATCAGCCTGAAAGGTCA      |                    |
| <i>Rad51</i> -F         | GACTTGCTGATGAGTTTGGTGT    |                    |
| <i>Rad51</i> -R         | CCCCTCTTCCTTTTCTCAGGT     |                    |
| <i>Msh5</i> -RT-F       | ATGGCTTTCAGAGCGACCCC      |                    |
| <i>Msh5</i> -RT-R       | TATCCCAGCTCCACAGCA        |                    |
| <i>Six6os1</i> -RT-F    | AGCGCTGAAGACACCTGAAT      |                    |
| <i>Six6os1</i> -RT-R    | GTGAAGGCATCTTCTCCTTCTGA   |                    |
| <i>Six6os1</i> -F       | AGCAAATGTTTCTAAGCTACGTGAA | RT-qPCR & RIP-qPCR |
| <i>Six6os1</i> -R       | TCACATGTTGGCTTCCAGTTAC    |                    |
| <i>Msh5</i> -F          | CACCCCTCGGTGTACAAAGT      |                    |
| <i>Msh5</i> -R          | GTGTAAACCACAGCCTGAGC      |                    |
