# Supplementary material for: SRSF1 regulates primordial follicle formation and number determination during meiotic prophase I
Source: PubMed Central journal article supplement (PMC9993595; doi:10.1186/s12915-023-01549-7), 2023-03-08
Supplement: 12915_2023_1549_MOESM7_ESM.pdf [file 12915_2023_1549_MOESM7_ESM.pdf]

**Additional file 7: Table 4. Antibodies were used in this study.**

| <b>Name</b>                        | <b>Cat.NO.</b> | <b>Source</b>     | <b>Company</b>    | <b>Dilution</b>      |
|------------------------------------|----------------|-------------------|-------------------|----------------------|
| VASA                               | ab13840        | Rabbit polyclonal | abcam             | IF, 1: 800           |
| VASA                               | ab27591        | Mouse monoclonal  | abcam             | IF, 1: 800           |
| GAPDH                              | 60004-1-Ig     | Mouse monoclonal  | Proteintech       | WB, 1: 10000         |
| ACTB                               | 81115-1-RR     | Rabbit monoclonal | Proteintech       | WB, 1: 20000         |
| SYCP1                              | ab15090        | Rabbit polyclonal | abcam             | IF, 1: 500           |
| SYCP3<br>(AlexaFluor® 488)         | ab205846       | Mouse monoclonal  | abcam             | IF, 1: 500           |
| SYCP3                              | sc-74569       | Mouse monoclonal  | Santa Cruz        | IF, 1: 500           |
| RPA1                               |                | Rabbit polyclonal | Luo LAB           | IF, 1: 500           |
| SRSF1                              | 12929-2-AP     | Rabbit polyclonal | Proteintech       | WB, 1:1000 IF, 1:200 |
| SRSF1                              | sc-33652       | Mouse monoclonal  | Santa Cruz        | IF, 1:500            |
| $\gamma$ H2AX<br>(AlexaFluor® 555) | 05-636-AF555   | Mouse monoclonal  | Millipore         | IF, 1:800            |
| DMC1                               | 13714-1-AP     | Rabbit polyclonal | Proteintech       | IF, 1:500            |
| MLH1                               | 550838         | Mouse monoclonal  | BD Pharmingen™    | IF, 1: 50            |
| CREST                              | HCT-0100       | Human serum       | ImmunoVision      | IF, 1: 100           |
| HORMAD1                            | 13917-1-AP     | Rabbit polyclonal | Proteintech       | IF, 1: 200           |
| GM130                              | 610822         | Mouse monoclonal  | BD Pharmingen™    | IF, 1: 50            |
| KIT                                | ab256345       | Rabbit monoclonal | abcam             | IF, 1: 2000          |
| JAGGED1                            | sc-390177      | Mouse monoclonal  | Santa Cruz        | IF, 1: 400           |
| MSY2                               | sc-393840      | Mouse monoclonal  | Santa Cruz        | IF, 1: 400           |
| MSH5                               | bs-17852R      | Rabbit polyclonal | Bioss             | WB, 1: 1000          |
| SIX6OS1                            | TD12863S       | Rabbit polyclonal | Abmart            | WB, 1:1000 IF, 1:200 |
| GAR-647                            | bs-0295G-AF647 | Goat polyclonal   | Bioss             | IF, 1: 500           |
| GAH-647                            | bs-0297G-AF647 | Goat polyclonal   | Bioss             | IF, 1: 500           |
| GAR-488                            | A11034         | Goat polyclonal   | Life Technologies | IF, 1: 500           |
| GAM-594                            | A32742         | Goat polyclonal   | Life Technologies | IF, 1: 500           |
| DAR-594                            | A-21207        | Donkey polyclonal | Life Technologies | IF, 1: 500           |
| DAM-488                            | A-21202        | Donkey polyclonal | Life Technologies | IF, 1: 500           |
| GAR-HRP                            | 7074P2         | Goat polyclonal   | CST               | WB, 1: 2000          |
| GAM-HRP                            | 7076P2         | Goat polyclonal   | CST               | WB, 1: 2000          |
