# Supplementary material for: SRSF1 regulates primordial follicle formation and number determination during meiotic prophase I
Source: PubMed Central journal article supplement (PMC9993595; doi:10.1186/s12915-023-01549-7), 2023-03-08

Fig. 2c

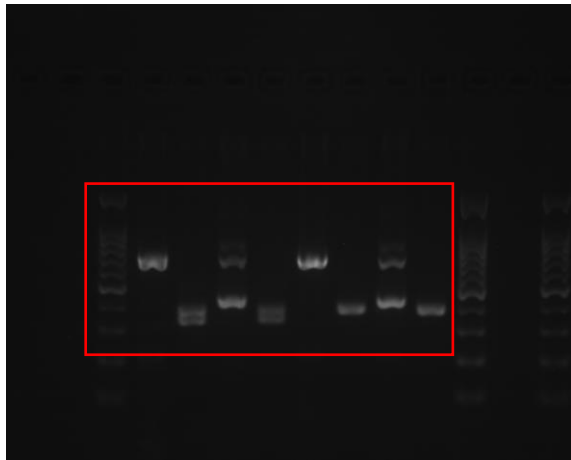

Fig. 7d

*Six6os1*

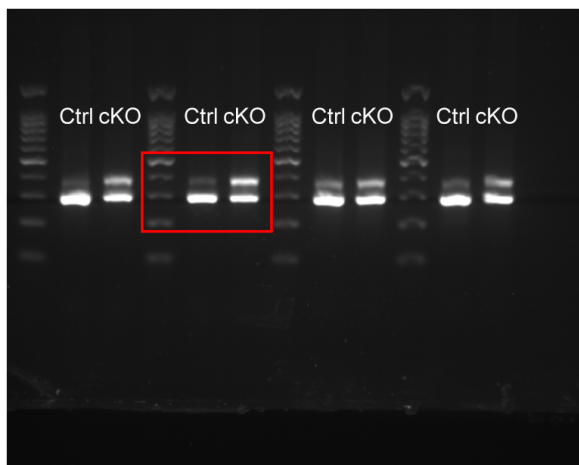

*Msh5*

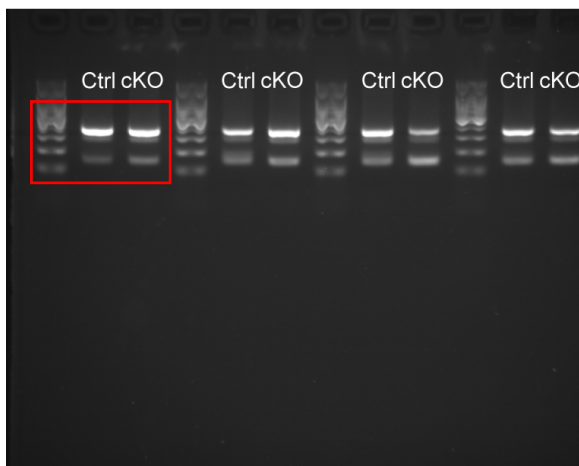

Fig. 7g

GAPDH

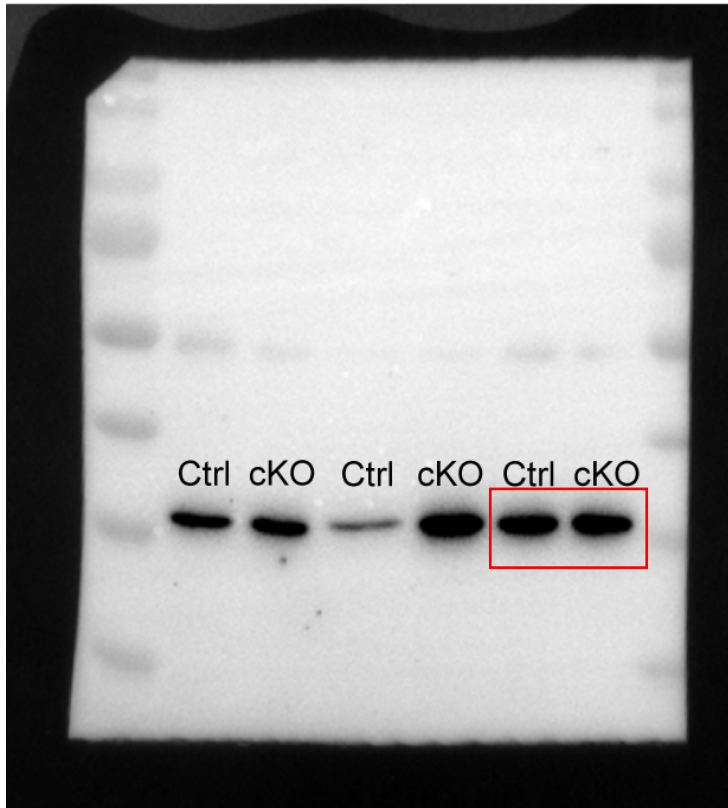

MSH5

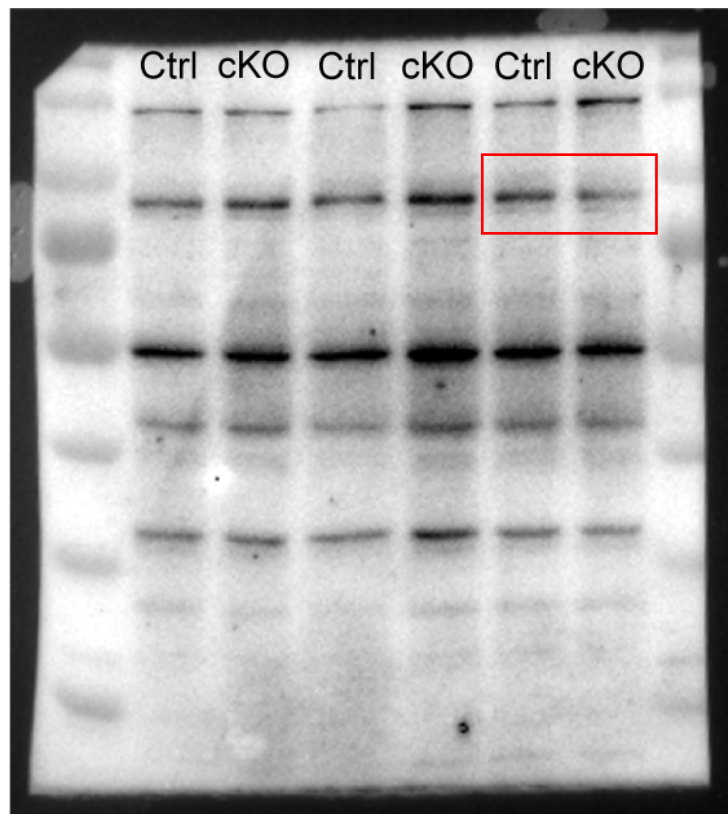

Fig. 7h

ACTB

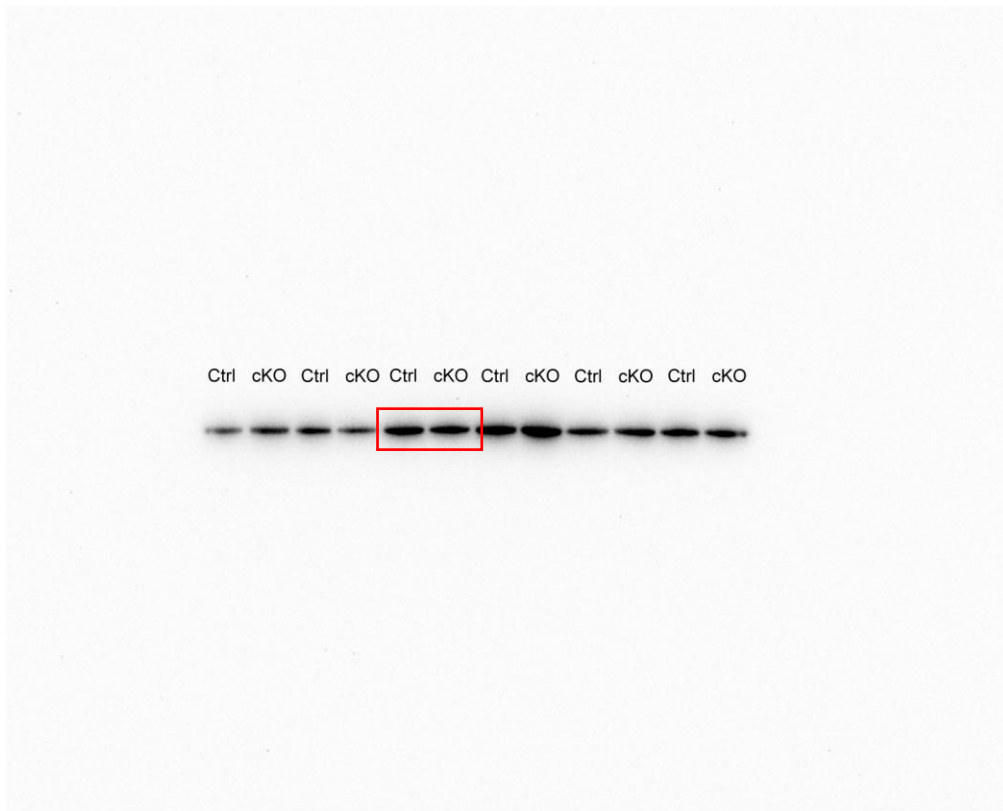

SIX6OS1

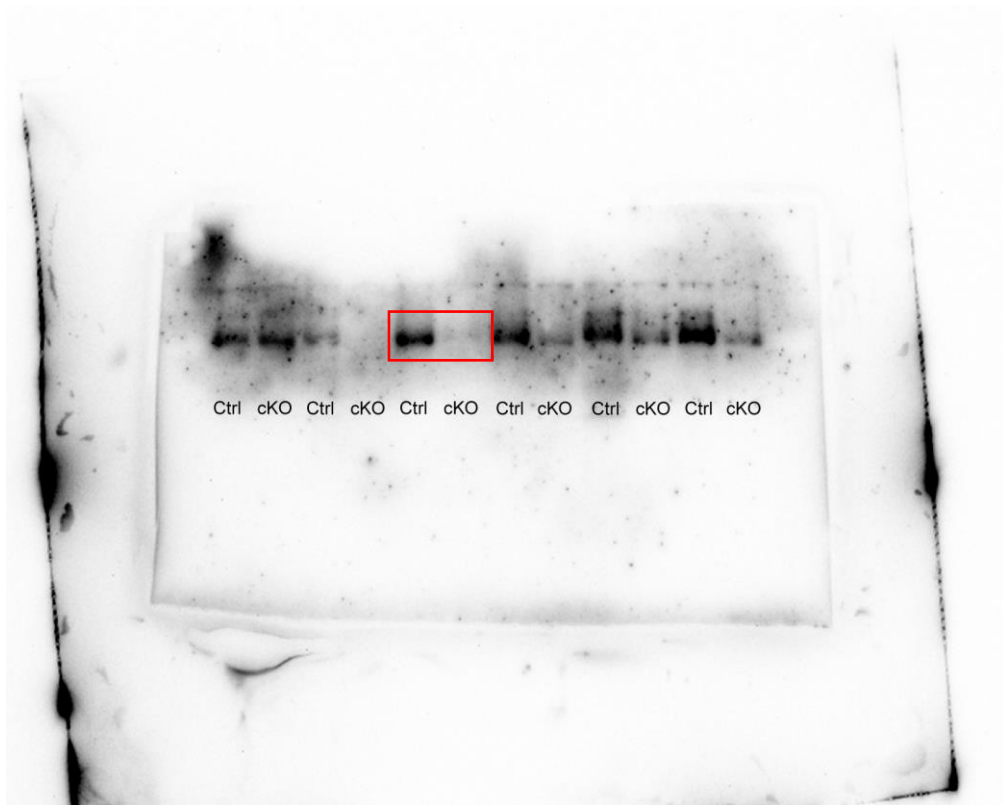

Fig. S1b

SRSF1

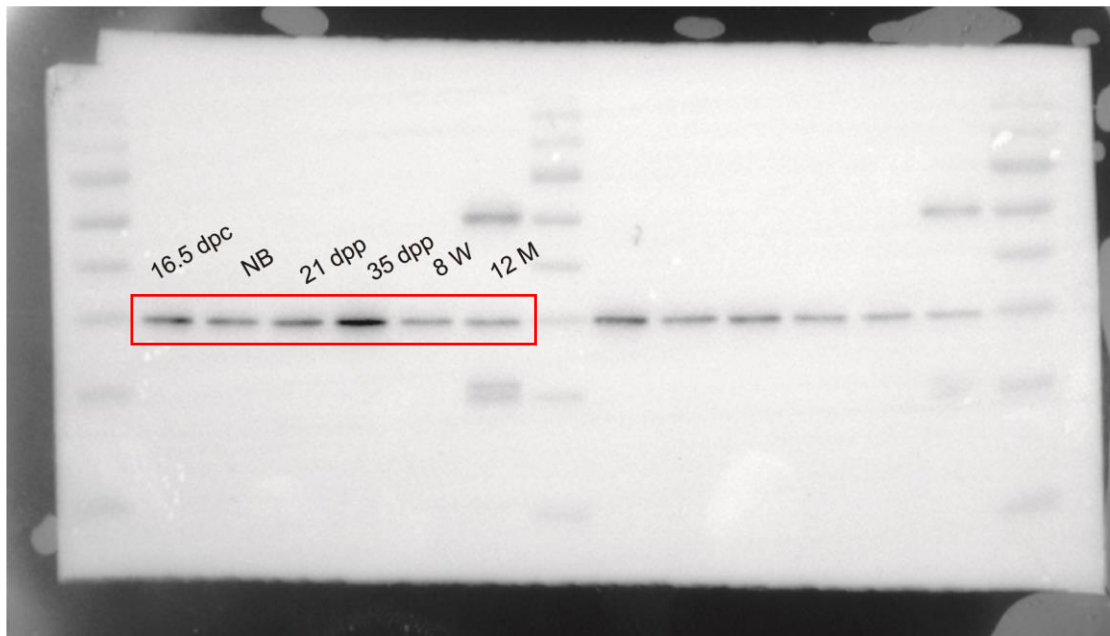

ACTB

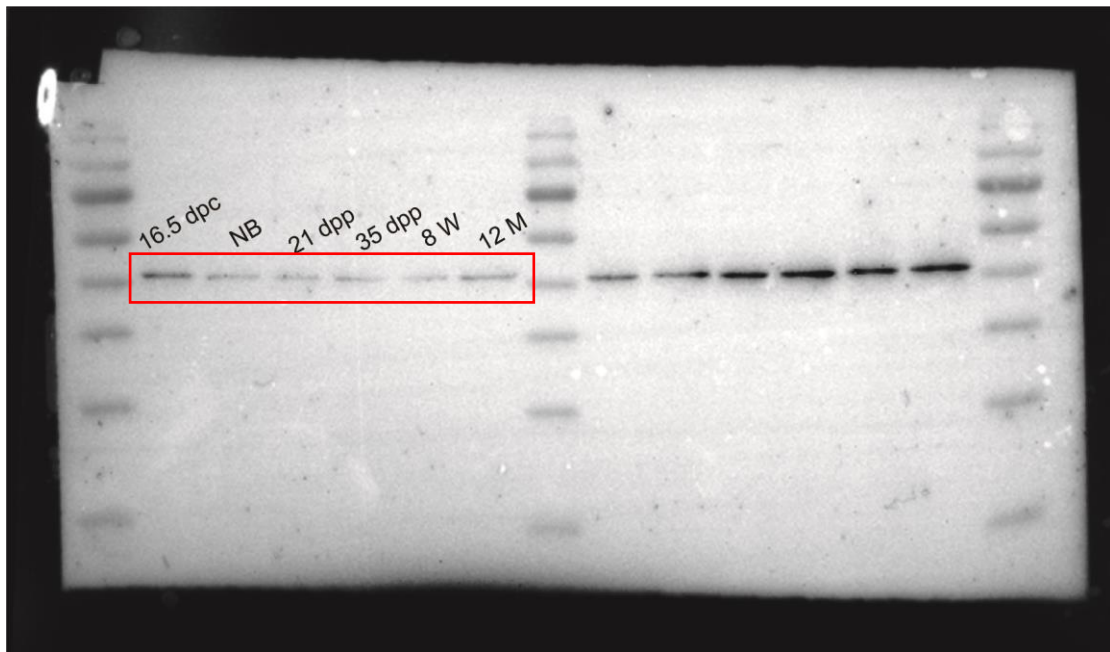

Supplement: 12915_2023_1549_MOESM8_ESM.pdf [file 12915_2023_1549_MOESM8_ESM.pdf]
